# Supplementary material for: Synthesis, C–H bond functionalisation and cycloadditions of 6-styryl-1,2-oxathiine 2,2-dioxides
Source: Royal Society of Chemistry journal article supplement (doi:10.1039/d1ob01125a), 2021-01-01
Supplement: d1ob01125a1.pdf [file d1ob01125a1.pdf]

**Synthesis, C-H bond functionalisation and cycloadditions of  
6-styryl-1,2-oxathiane 2,2-dioxides**

Christopher D. Gabbutt, B. Mark Heron\*, Thomas Lilly,

Ochola W. Ogwang and Dimitrios Zonidis\*

Department of Chemical Sciences, School of Applied Sciences, University of Huddersfield,  
Queensgate, Huddersfield, HD1 3DH, UK

Electronic Supplementary Information

<sup>1</sup>H NMR, <sup>13</sup>C NMR, <sup>19</sup>F NMR spectra, assorted 2D NMR spectra, DEPT spectra and mass spectra for new compounds and intermediates.

**(1E,4E)-1-(Dimethylamino)-5-(4-nitrophenyl)penta-1,4-dien-3-one 2d <sup>1</sup>H-NMR**

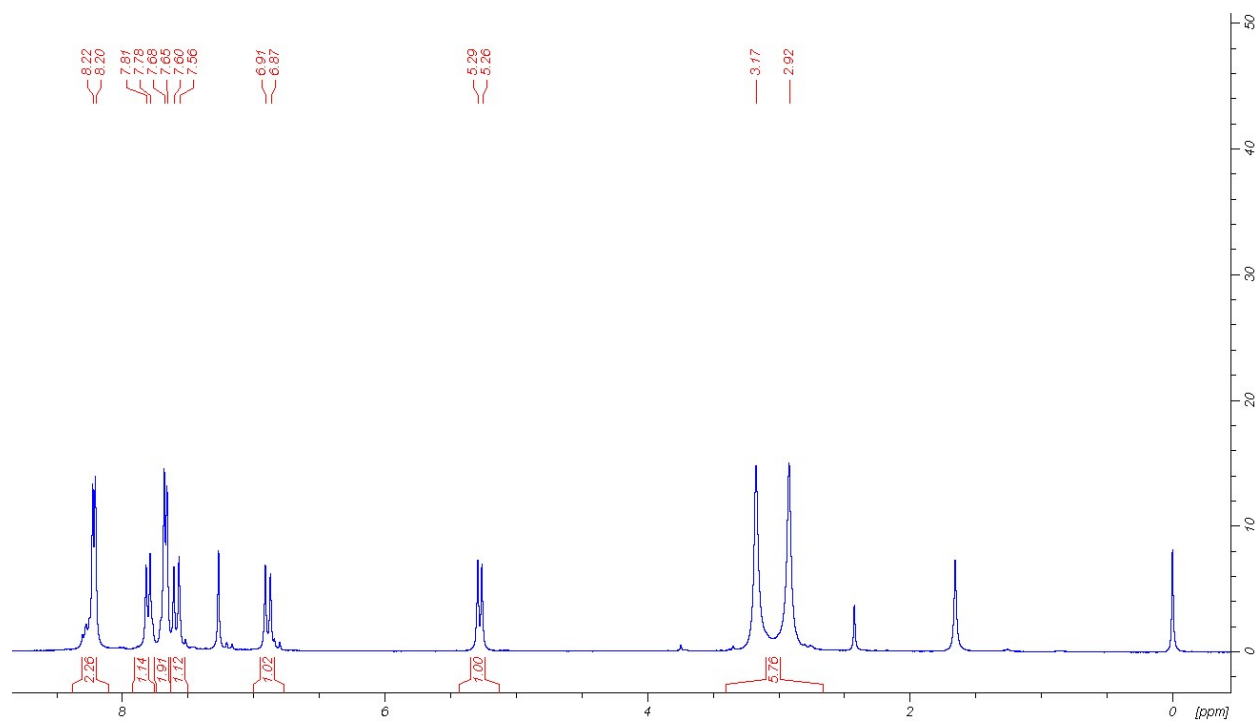

**2d <sup>13</sup>C-NMR**

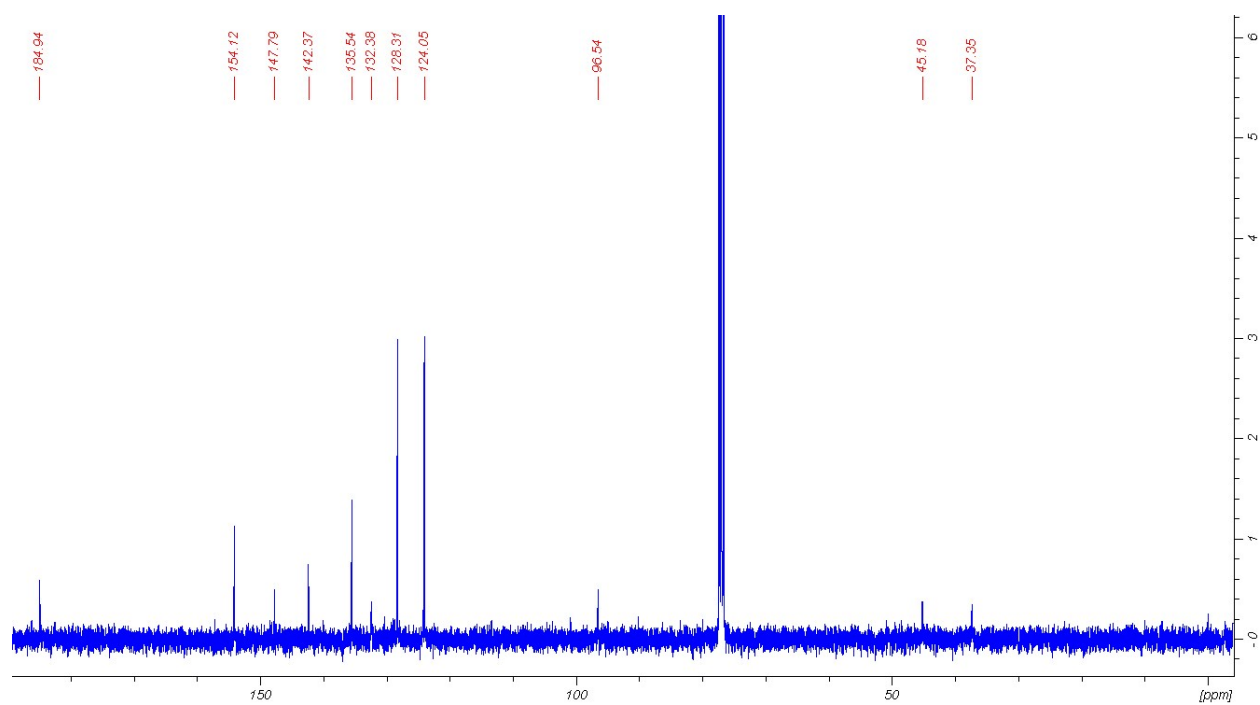

## 2d HRMS

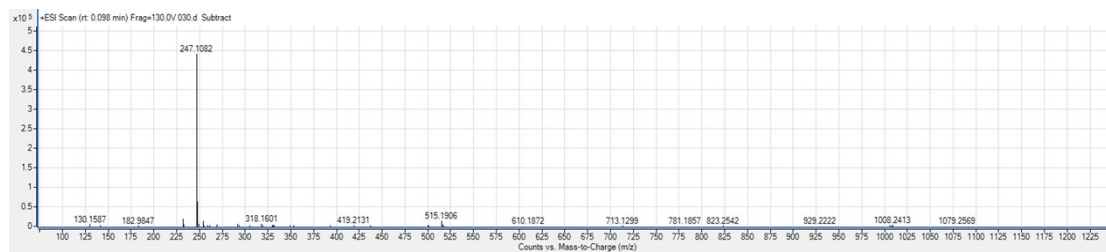

| Formula                                                       | Observed m/z | Proposed adduct | Charge | Observed neutral mass | Theoretical neutral mass | Mass error (ppm) |
|---------------------------------------------------------------|--------------|-----------------|--------|-----------------------|--------------------------|------------------|
| C <sub>13</sub> H <sub>14</sub> N <sub>2</sub> O <sub>3</sub> | 247.1082     | H+              | 1+     | 246.1009              | 246.1004                 | 1.69             |
|                                                               |              |                 |        |                       |                          |                  |
|                                                               |              |                 |        |                       |                          |                  |

**(1E,4E)-1-(2-Bromophenyl)-5-(dimethylamino)penta-1,4-dien-3-one 2e <sup>1</sup>H-NMR**

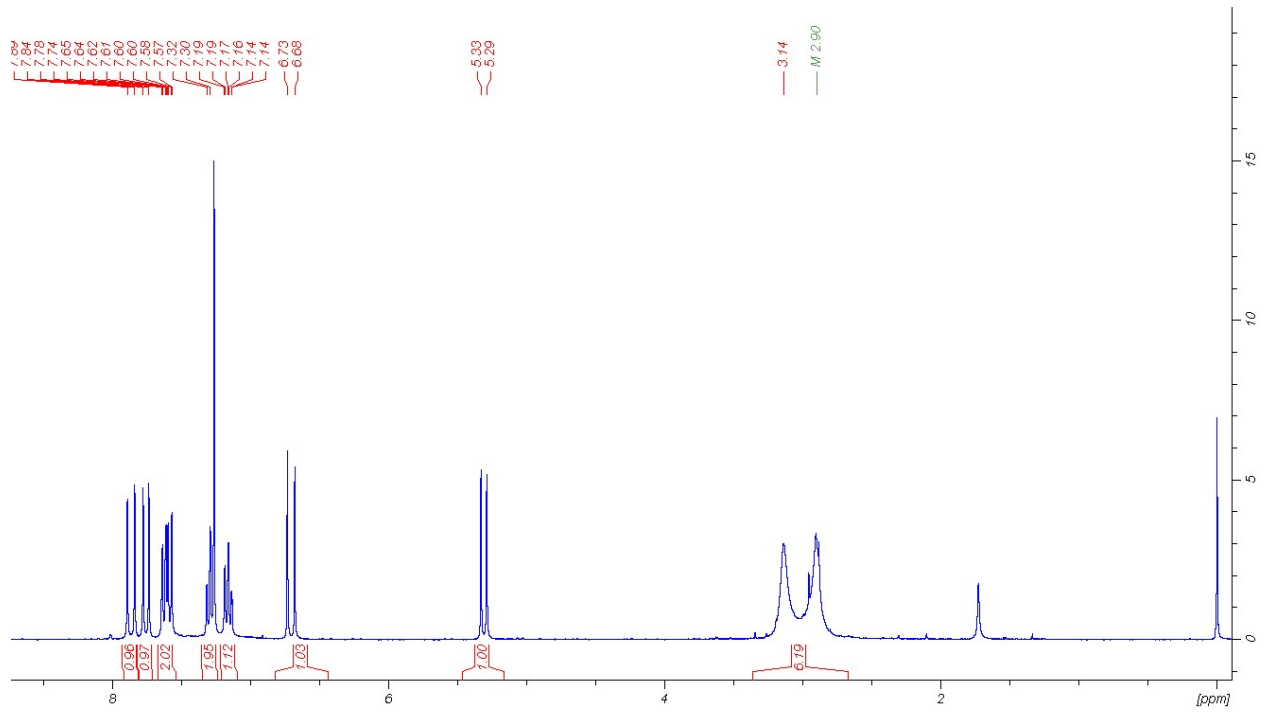

**2e <sup>13</sup>C-NMR**

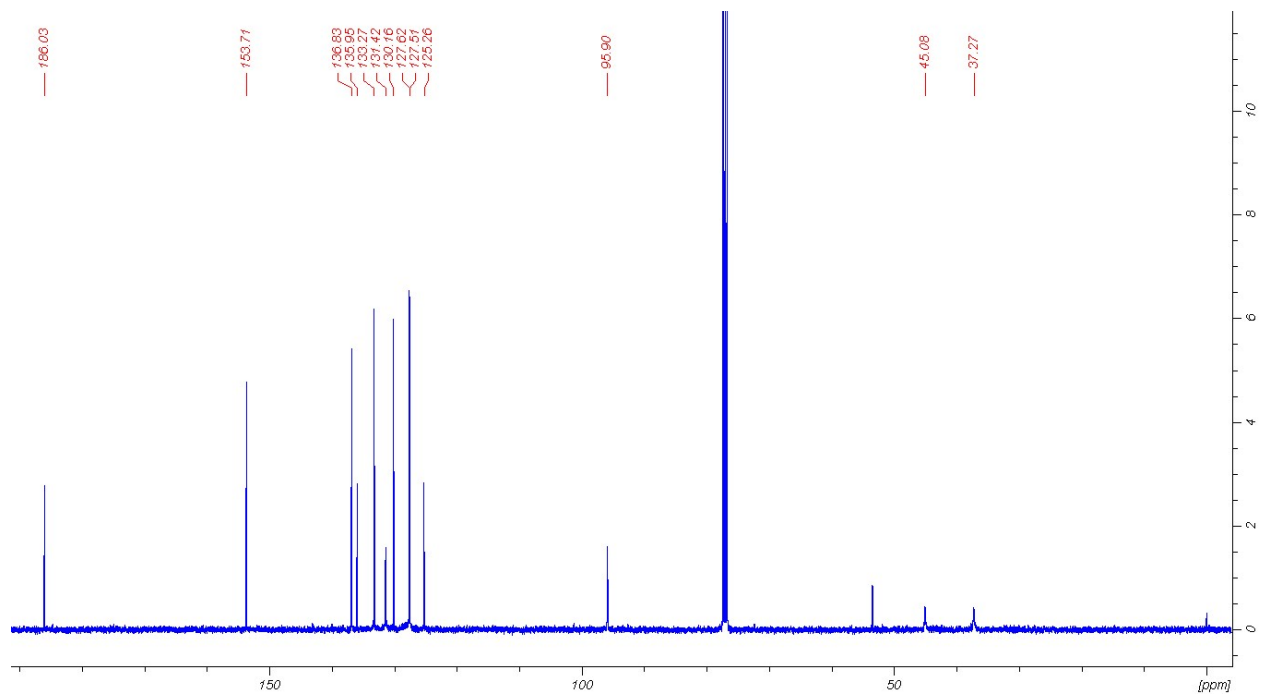

## 2e HRMS

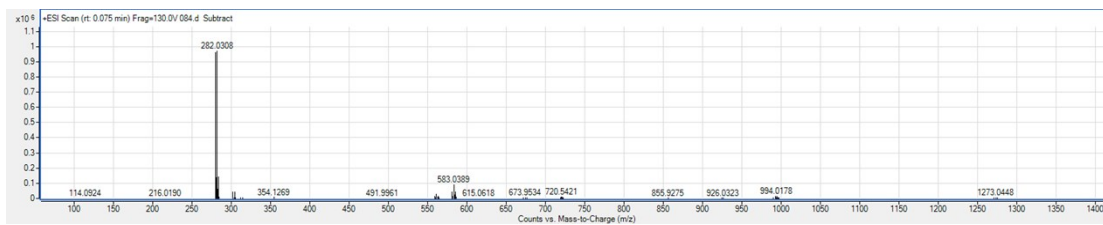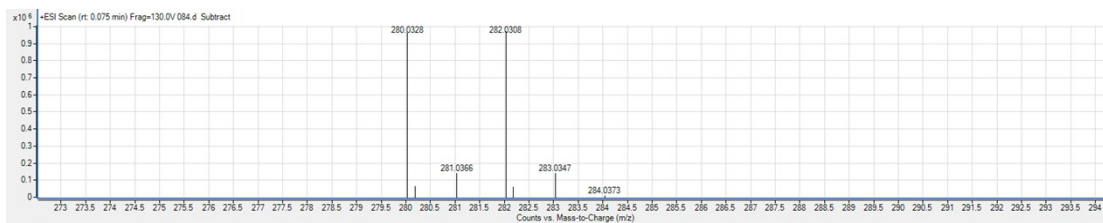

| Formula                              | Observed m/z | Proposed adduct | Charge | Observed neutral mass | Theoretical neutral mass | Mass error (ppm) |
|--------------------------------------|--------------|-----------------|--------|-----------------------|--------------------------|------------------|
| C <sub>13</sub> H <sub>14</sub> BrNO | 282.0308     | H <sup>+</sup>  | 1+     | 279.0256              | 279.0259                 | 1.09             |
|                                      |              |                 |        |                       |                          |                  |
|                                      |              |                 |        |                       |                          |                  |

**(E)-4-(Dimethylamino)-3-phenyl-6-styryl-3,4-dihydro-1,2-oxathiine 2,2-oxide 3a <sup>1</sup>H-NMR**

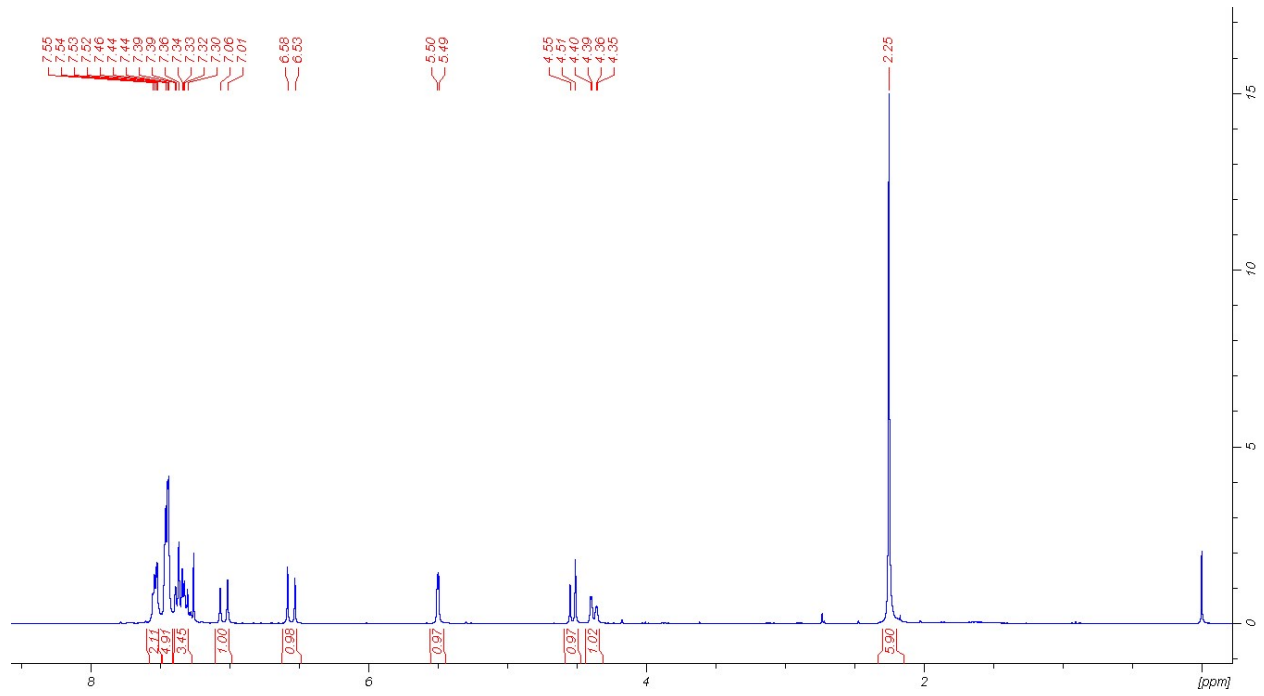

**3a <sup>13</sup>C-NMR**

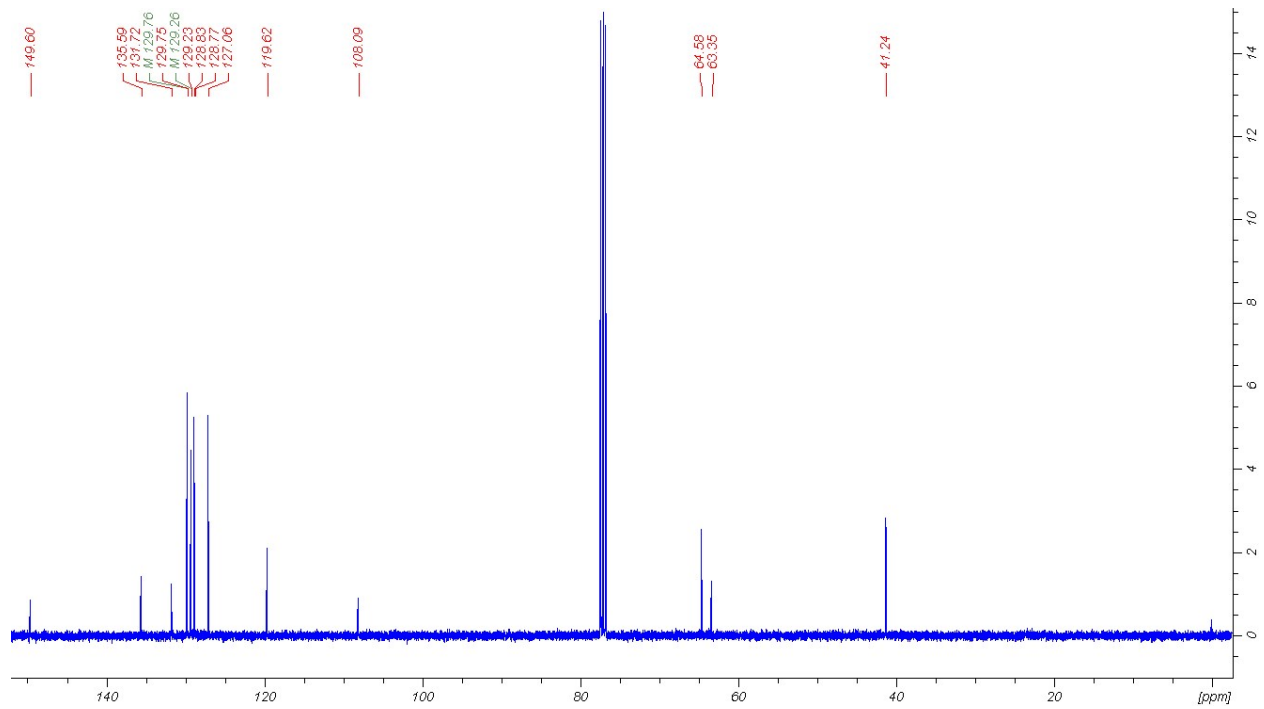

### 3a HRMS

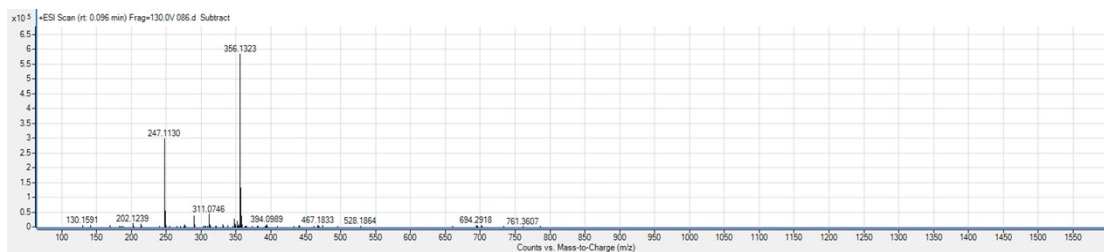

| Formula                                           | Observed m/z | Proposed adduct | Charge | Observed neutral mass | Theoretical neutral mass | Mass error (ppm) |
|---------------------------------------------------|--------------|-----------------|--------|-----------------------|--------------------------|------------------|
| C <sub>20</sub> H <sub>21</sub> NO <sub>3</sub> S | 356.1323     | H+              | 1+     | 355.1250              | 355.1242                 | 2.17             |
|                                                   |              |                 |        |                       |                          |                  |
|                                                   |              |                 |        |                       |                          |                  |

**(E)-4-(Dimethylamino)-6-(4-methoxystyryl)-3-phenyl-3,4-dihydro-1,2-oxathiane 2,2-dioxide 3b <sup>1</sup>H-NMR**

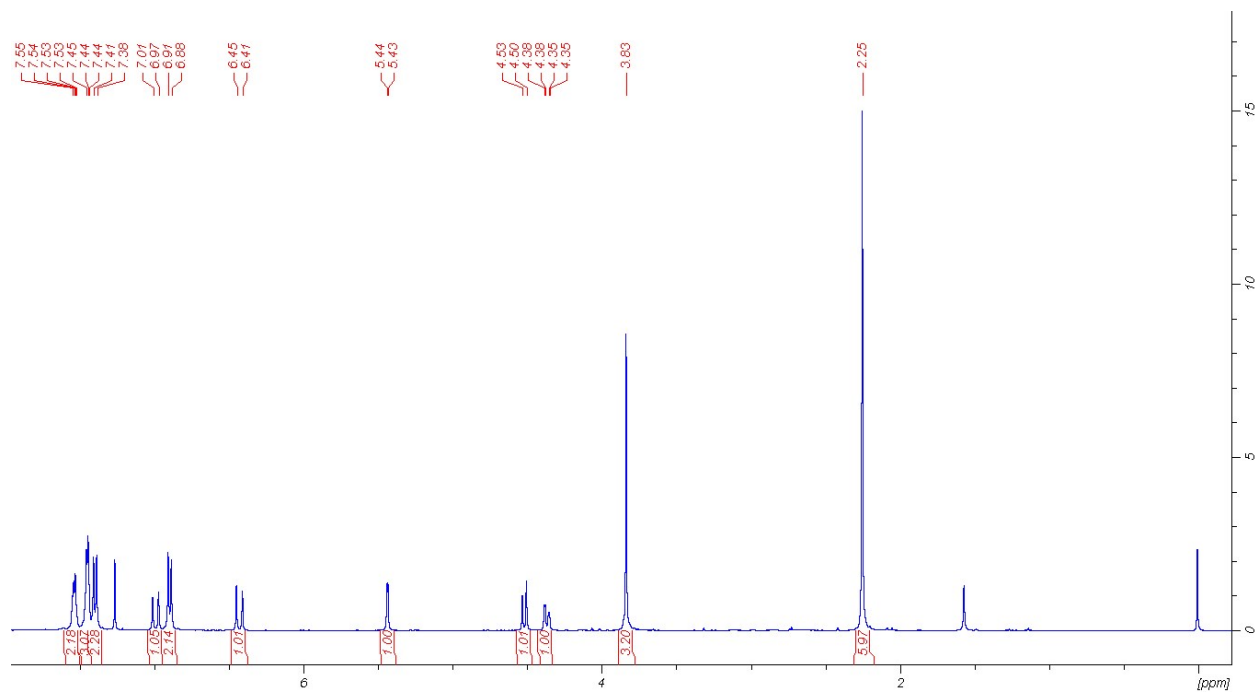

**3b <sup>13</sup>C-NMR**

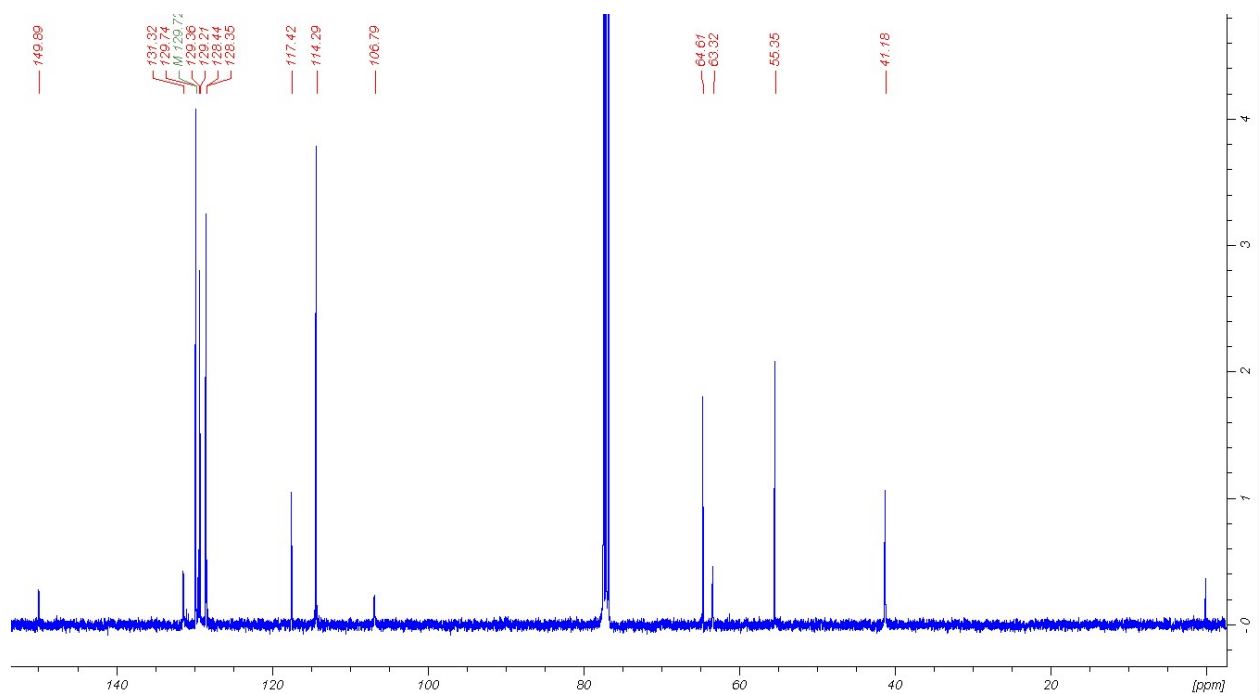



### 3b HRMS

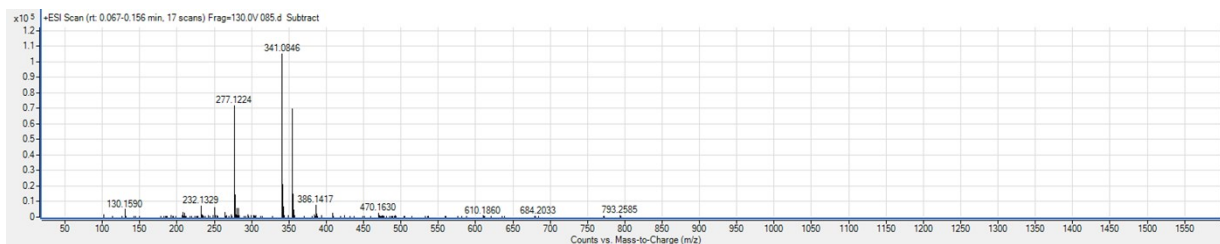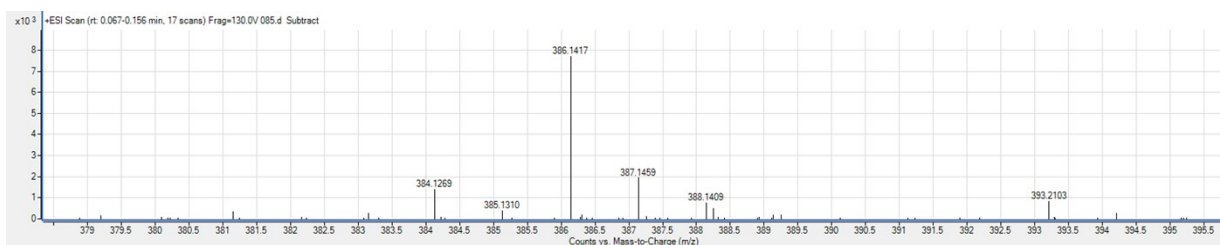

| Formula                                           | Observed m/z | Proposed adduct | Charge | Observed neutral mass | Theoretical neutral mass | Mass error (ppm) |
|---------------------------------------------------|--------------|-----------------|--------|-----------------------|--------------------------|------------------|
| C <sub>21</sub> H <sub>23</sub> NO <sub>4</sub> S | 386.1417     | H <sup>+</sup>  | 1+     | 385.1346              | 385.1348                 | 0.55             |
|                                                   |              |                 |        |                       |                          |                  |
|                                                   |              |                 |        |                       |                          |                  |

**(E)-4-(Dimethylamino)-3-phenyl-6-(4-(trifluoromethyl)styryl)-3,4-dihydro-1,2-oxathine 2,2-dioxide 3c**  
<sup>1</sup>H-NMR

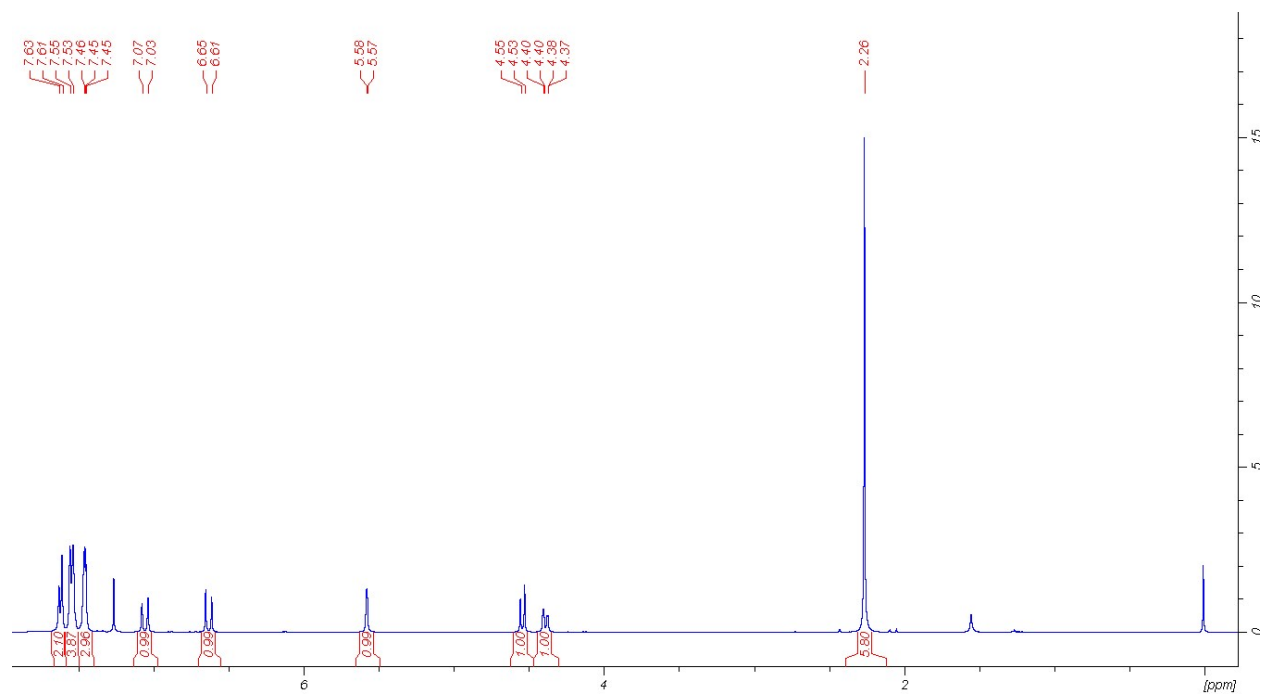

**3c <sup>13</sup>C-NMR**

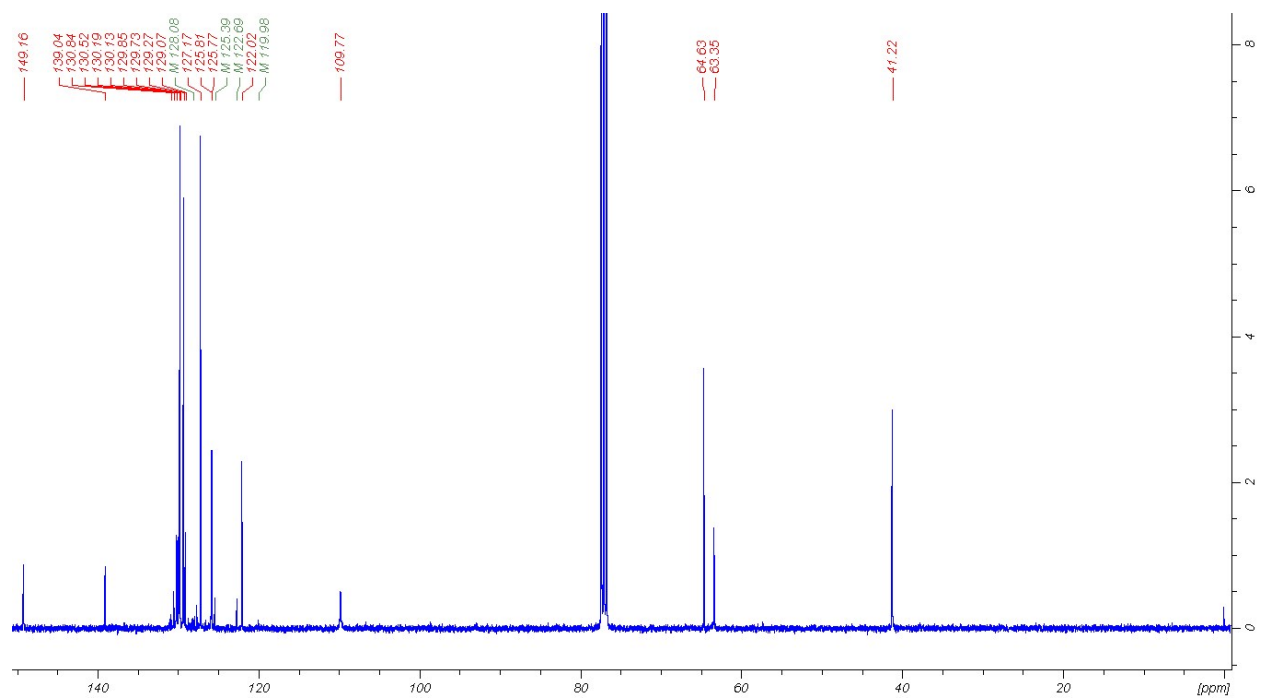

### 3c <sup>19</sup>F-NMR

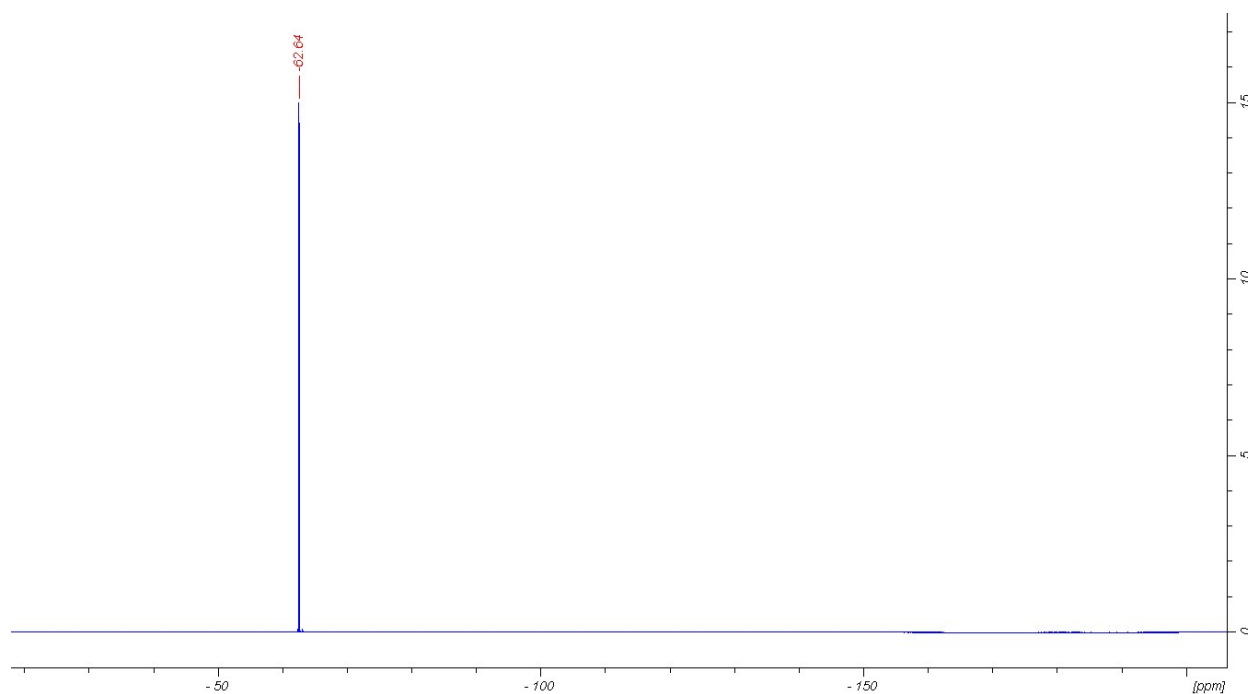

### 3c HRMS

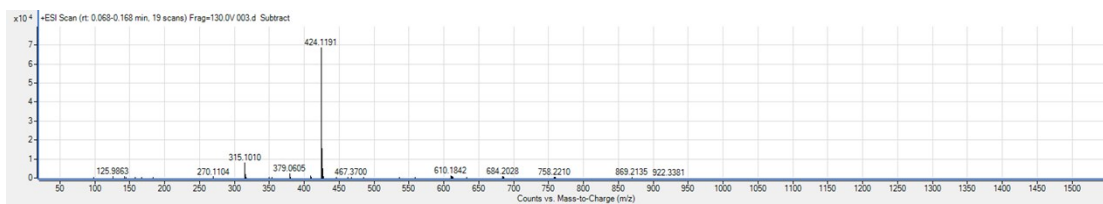

| Formula                                                          | Observed m/z | Proposed adduct | Charge | Observed neutral mass | Theoretical neutral mass | Mass error (ppm) |
|------------------------------------------------------------------|--------------|-----------------|--------|-----------------------|--------------------------|------------------|
| C <sub>21</sub> H <sub>20</sub> F <sub>3</sub> NO <sub>3</sub> S | 424.1191     | H+              | 1+     | 423.1118              | 423.1116                 | 0.42             |
|                                                                  |              |                 |        |                       |                          |                  |
|                                                                  |              |                 |        |                       |                          |                  |

**(E)-4-(Dimethylamino)-6-(4-nitrostyryl)-3-phenyl-3,4-dihydro-1,2-oxathiane 2,2-dioxide 3d <sup>1</sup>H-NMR**

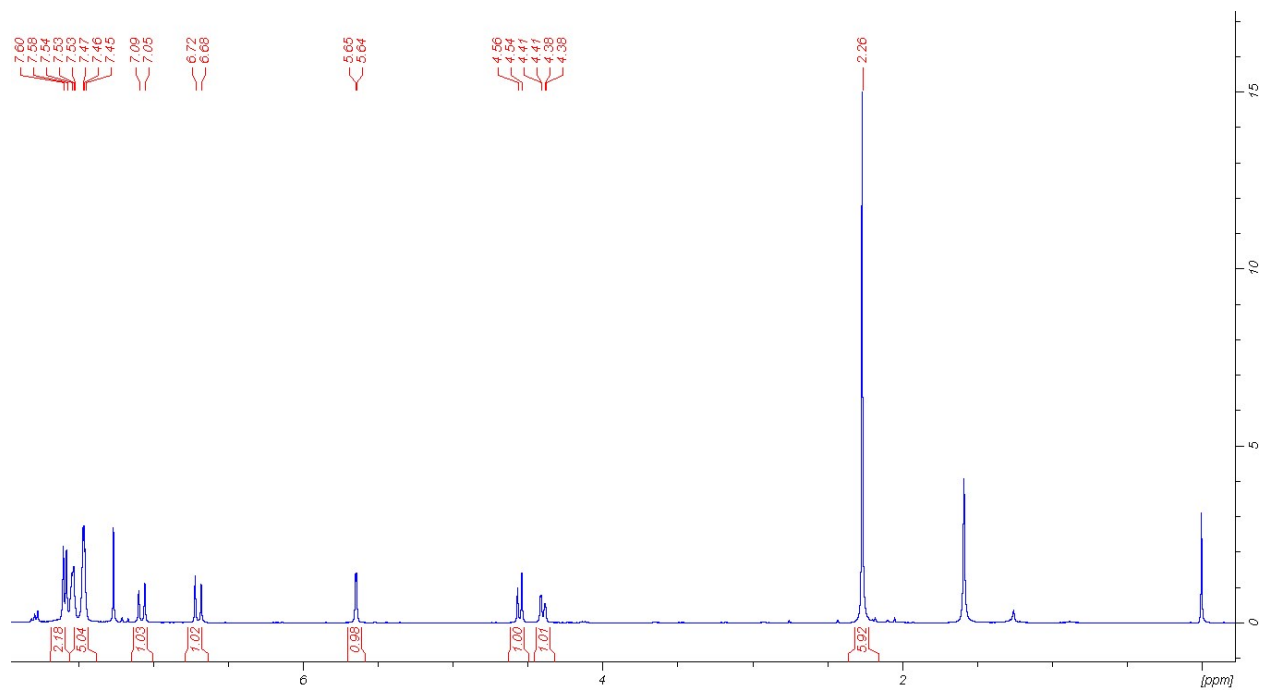

**3d <sup>13</sup>C-NMR**

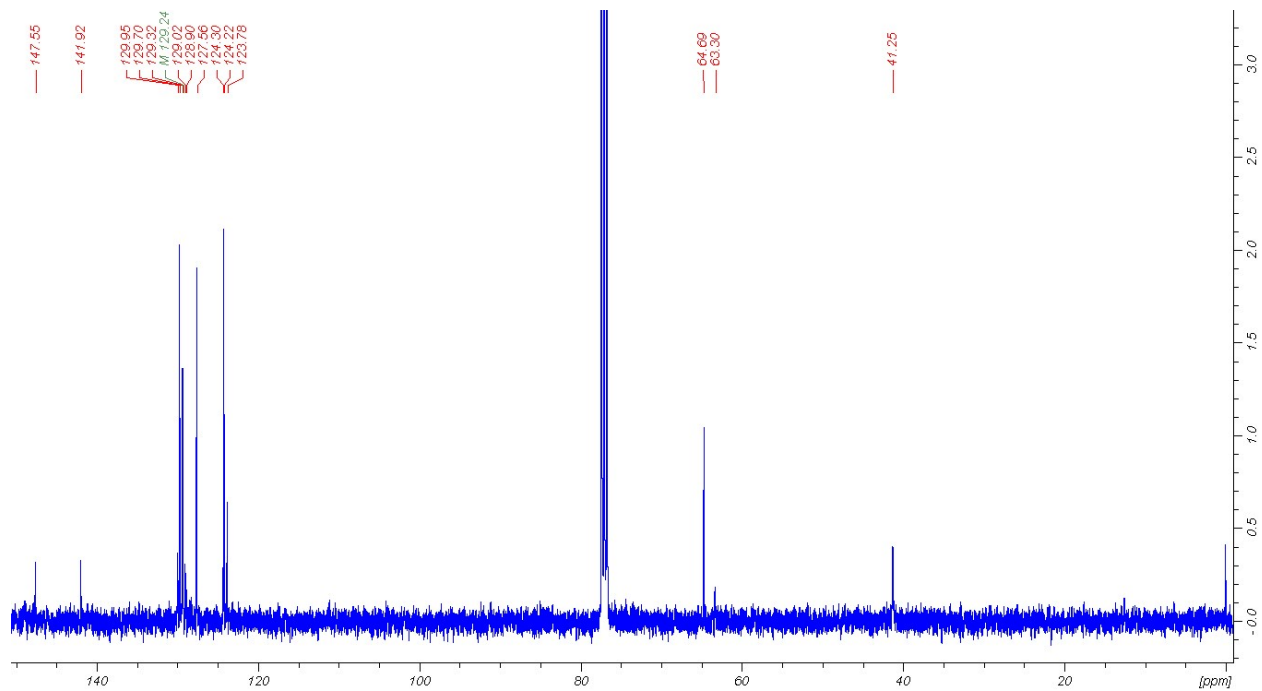

### 3d HRMS

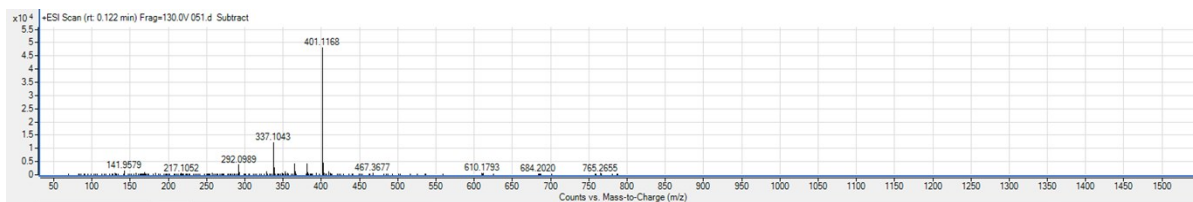

| Formula                                                         | Observed m/z | Proposed adduct | Charge         | Observed neutral mass | Theoretical neutral mass | Mass error (ppm) |
|-----------------------------------------------------------------|--------------|-----------------|----------------|-----------------------|--------------------------|------------------|
| C <sub>20</sub> H <sub>20</sub> N <sub>2</sub> O <sub>5</sub> S | 401.1168     | H <sup>+</sup>  | 1 <sup>+</sup> | 400.1095              | 400.1093                 | 0.64             |
|                                                                 |              |                 |                |                       |                          |                  |
|                                                                 |              |                 |                |                       |                          |                  |

**(E)-6-(2-Bromostyryl)-4-(dimethylamino)-3-phenyl-3,4-dihydro-1,2-oxathiane 2,2-dioxide 3e <sup>1</sup>H-NMR**

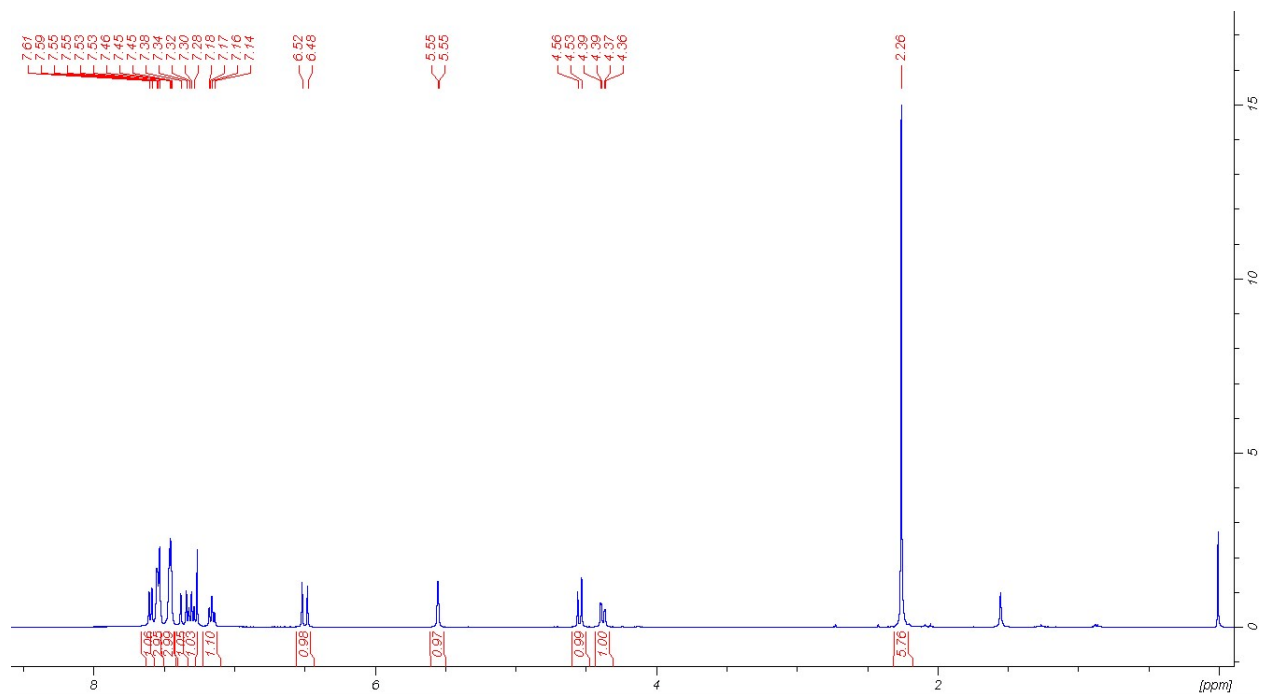

**3e <sup>13</sup>C-NMR**

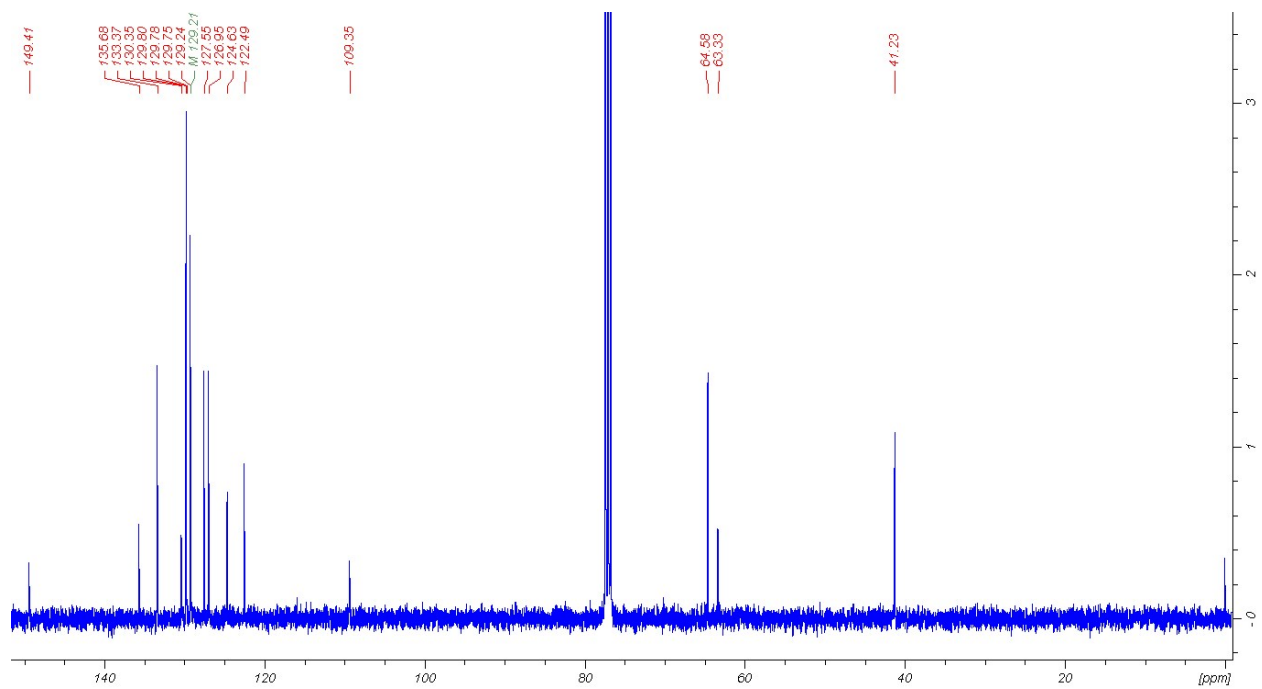

### 3e HRMS

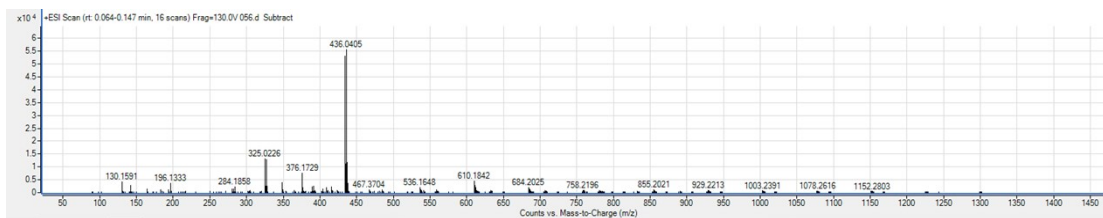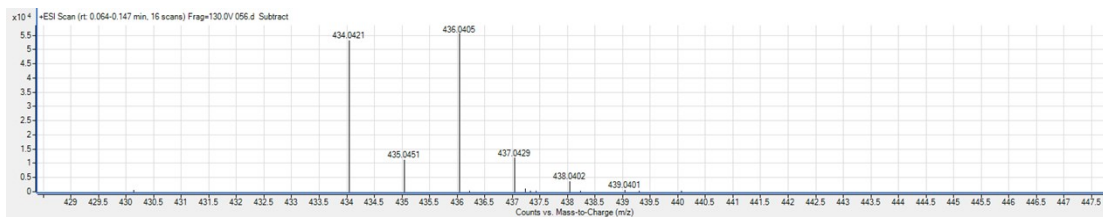

| Formula      | Observed m/z | Proposed adduct | Charge | Observed neutral mass | Theoretical neutral mass | Mass error (ppm) |
|--------------|--------------|-----------------|--------|-----------------------|--------------------------|------------------|
| C20H20BrNO3S | 436.0404     | H+              | 1+     | 433.0349              | 433.0347                 | 0.38             |
|              |              |                 |        |                       |                          |                  |
|              |              |                 |        |                       |                          |                  |

### 4-(Dimethylamino)-3-phenyl-6-(phenylethynyl)-3,4-dihydro-1,2-oxathiane 2,2-dioxide 3f <sup>1</sup>H-NMR

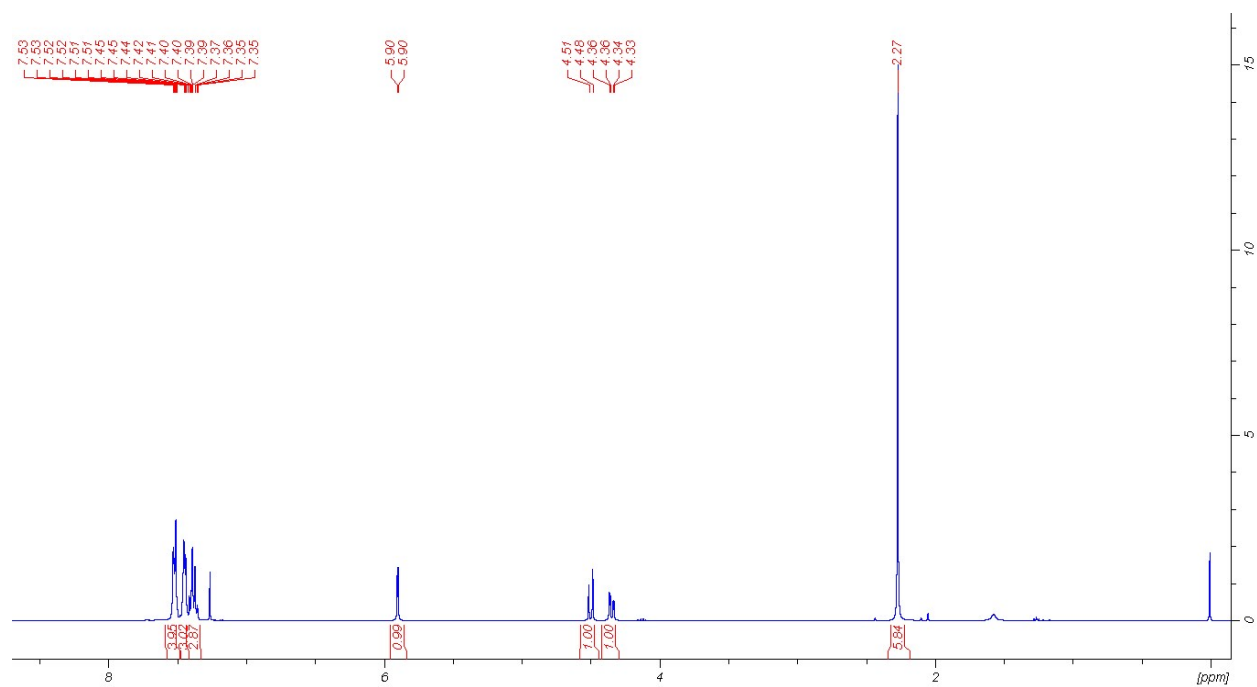

### 3f <sup>13</sup>C-NMR

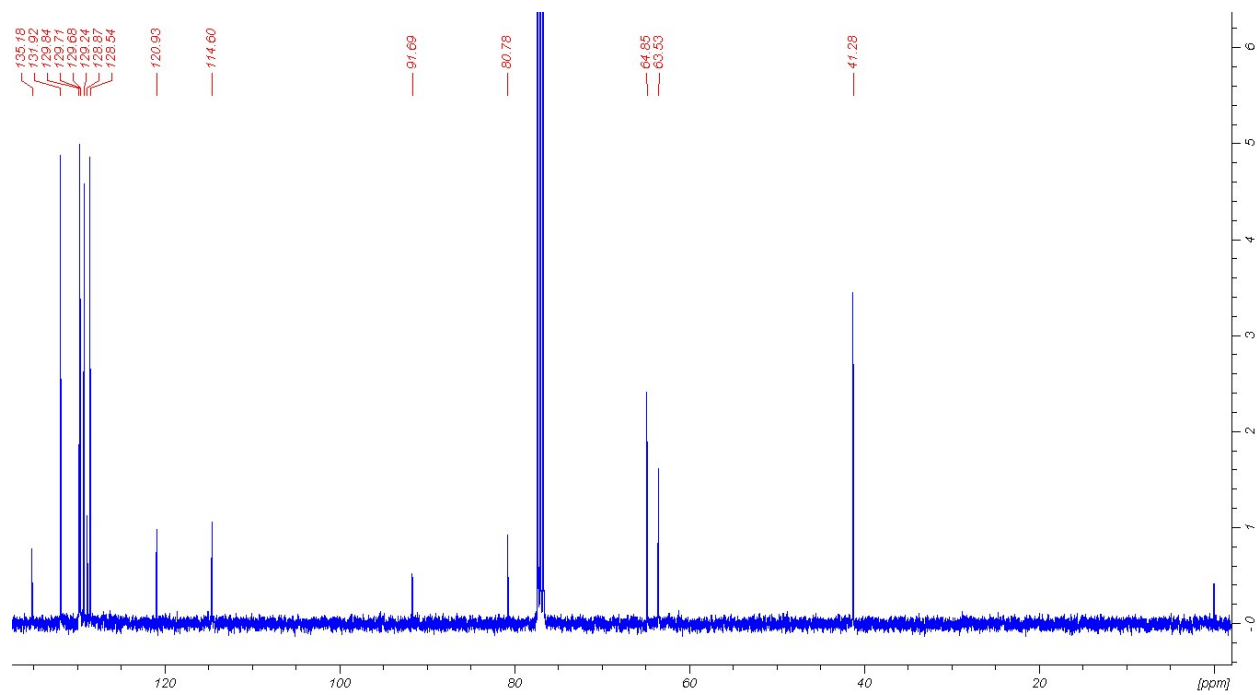



### 3f HRMS

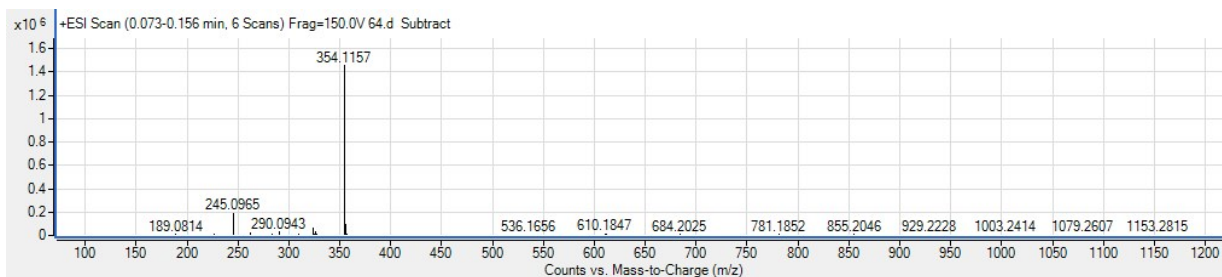

| Formula                                           | Observed m/z | Proposed adduct | Charge | Observed neutral mass | Theoretical neutral mass | Mass error (ppm) |
|---------------------------------------------------|--------------|-----------------|--------|-----------------------|--------------------------|------------------|
| C <sub>20</sub> H <sub>19</sub> NO <sub>3</sub> S | 354.1157     | H+              | 1+     | 353.1085              | 353.1086                 | 0.28             |
|                                                   |              |                 |        |                       |                          |                  |
|                                                   |              |                 |        |                       |                          |                  |

**(E)-4-(Dimethylamino)-6-styryl-3,4-dihydro-1,2-oxathiine 2,2-dioxide 3g <sup>1</sup>H-NMR**

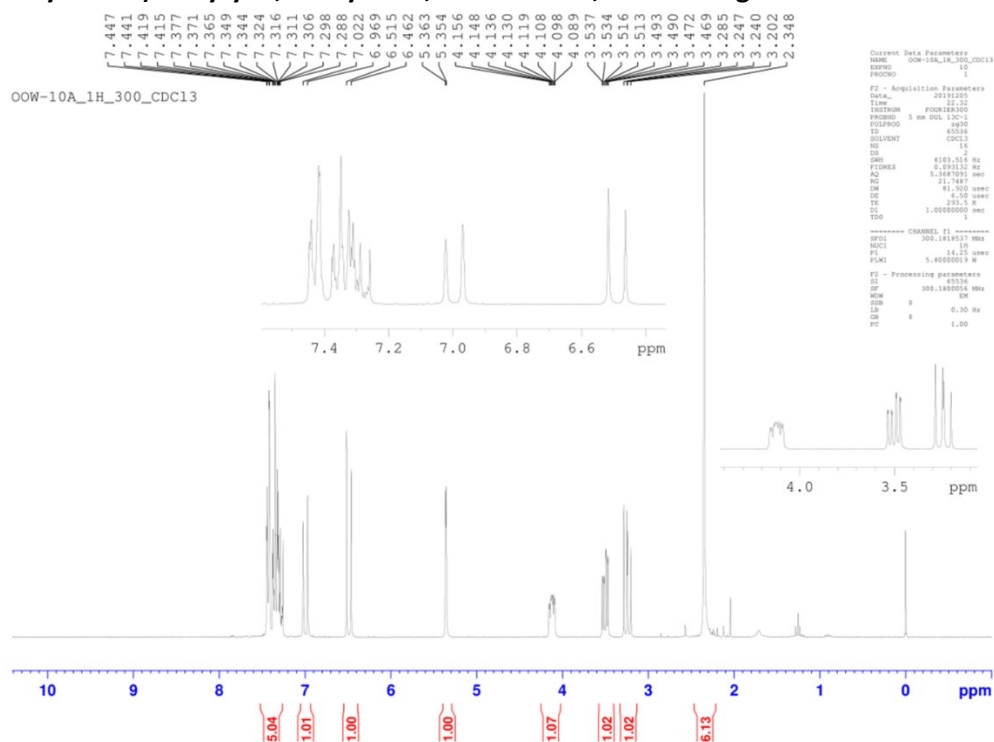

**3g <sup>13</sup>C-NMR**

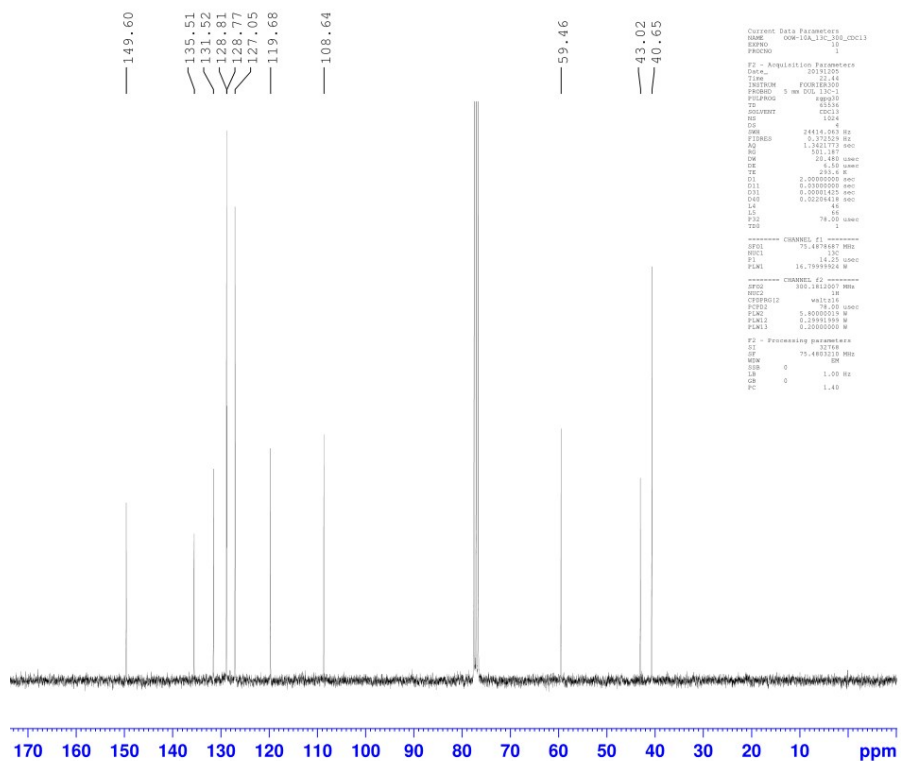

### 3g HRMS

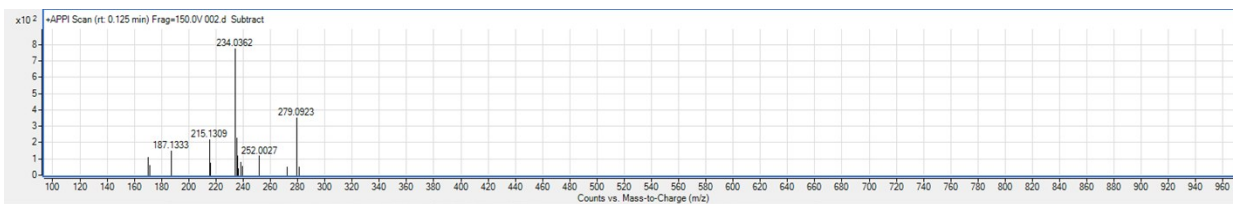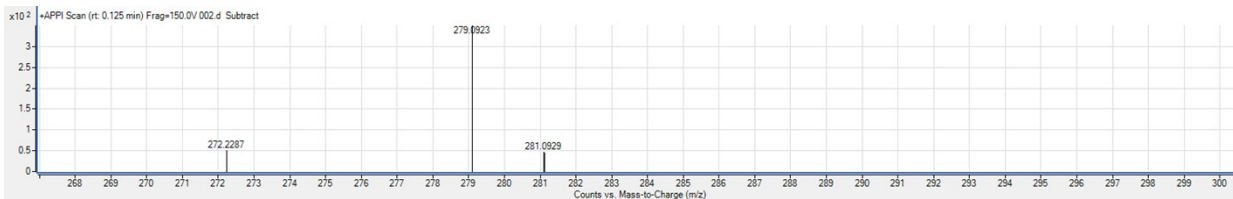

| Formula                                           | Observed m/z | Proposed adduct | Charge | Observed neutral mass | Theoretical neutral mass | Mass error (ppm) |
|---------------------------------------------------|--------------|-----------------|--------|-----------------------|--------------------------|------------------|
| C <sub>14</sub> H <sub>17</sub> NO <sub>3</sub> S | 279.0923     | radical         | 1+     | 279.0928              | 279.0929                 | 0.36             |
|                                                   |              |                 |        |                       |                          |                  |
|                                                   |              |                 |        |                       |                          |                  |

**(E)-3-Phenyl-6-styryl-1,2-oxathiane 2,2-dioxide 4a** <sup>1</sup>H-NMR

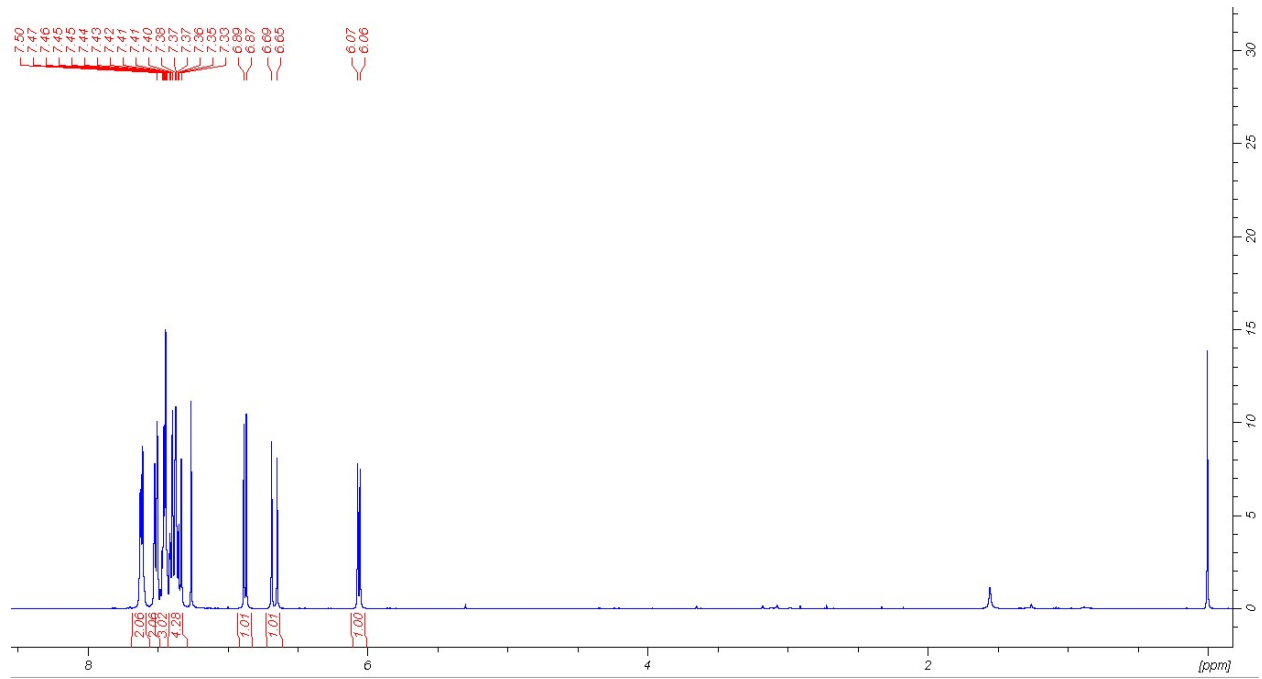

**4a** <sup>13</sup>C-NMR

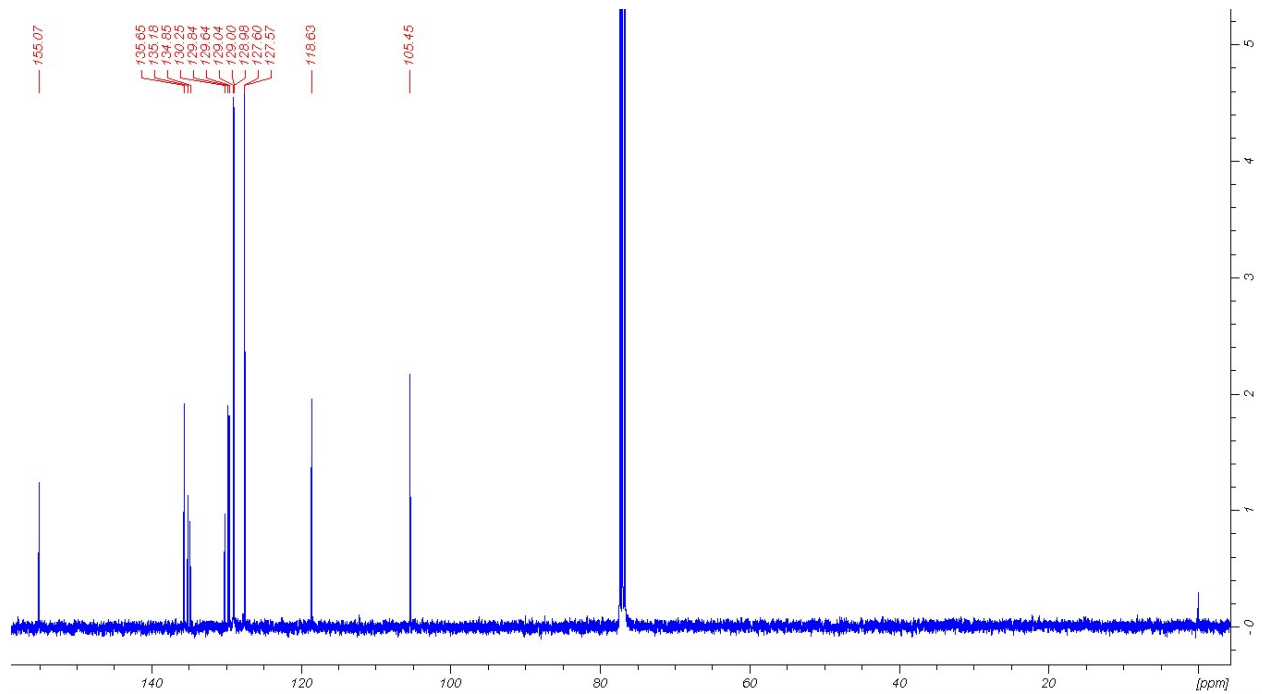

## 4a HRMS

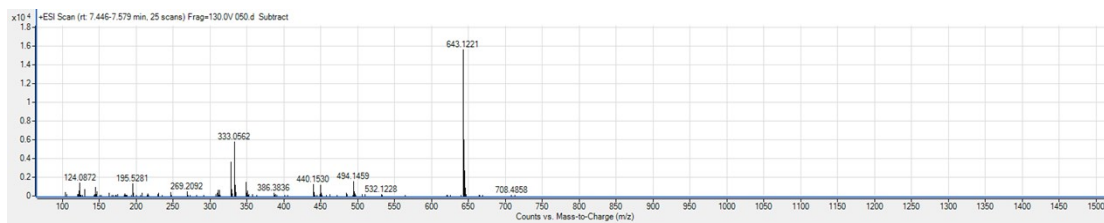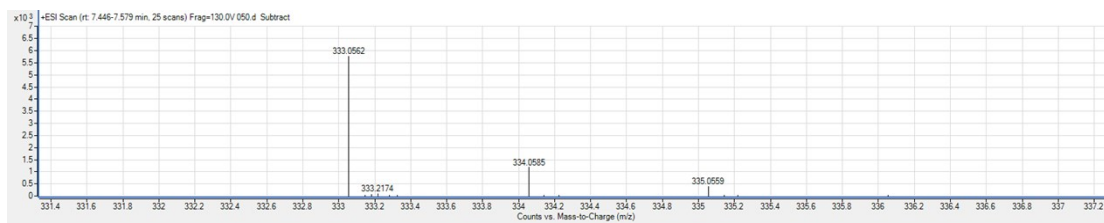

| Formula                                          | Observed m/z | Proposed adduct | Charge | Observed neutral mass | Theoretical neutral mass | Mass error (ppm) |
|--------------------------------------------------|--------------|-----------------|--------|-----------------------|--------------------------|------------------|
| C <sub>18</sub> H <sub>14</sub> O <sub>3</sub> S | 333.0562     | Na <sup>+</sup> | 1+     | 310.0669              | 310.0664                 | 1.57             |
|                                                  |              |                 |        |                       |                          |                  |
|                                                  |              |                 |        |                       |                          |                  |

**(E)-6-(4-Methoxystyryl)-3-phenyl-1,2-oxathiane 2,2-dioxide 4b <sup>1</sup>H-NMR**

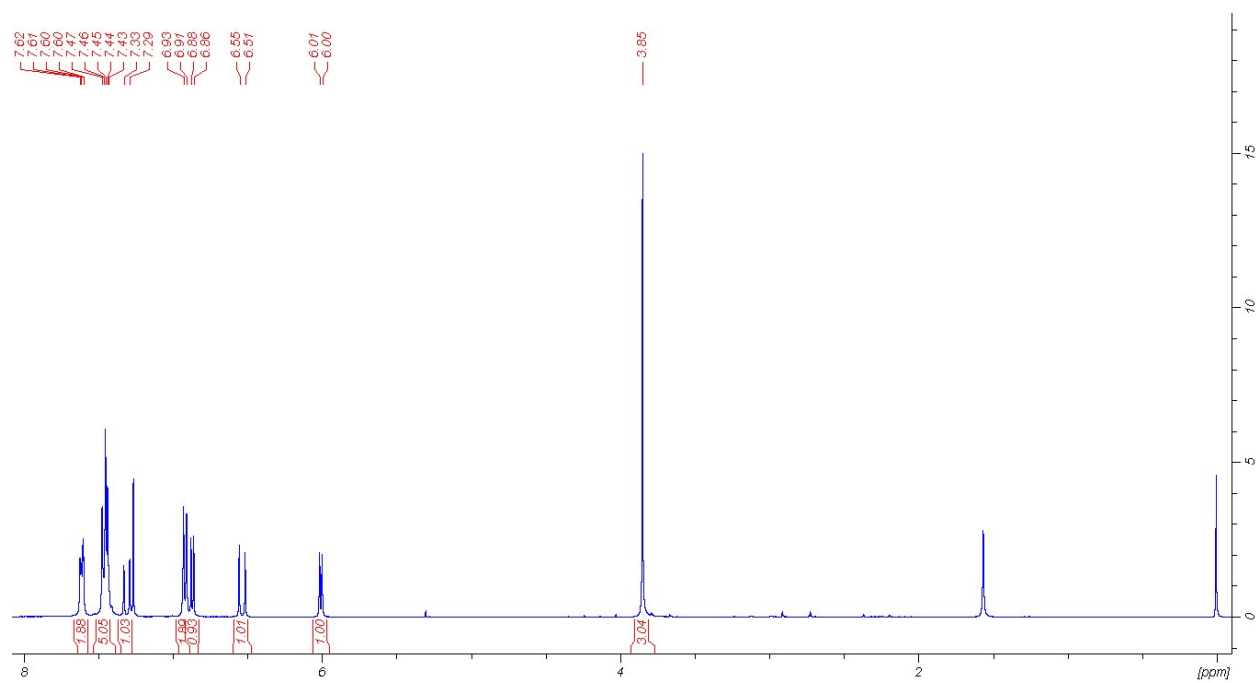

**4b <sup>13</sup>C-NMR**

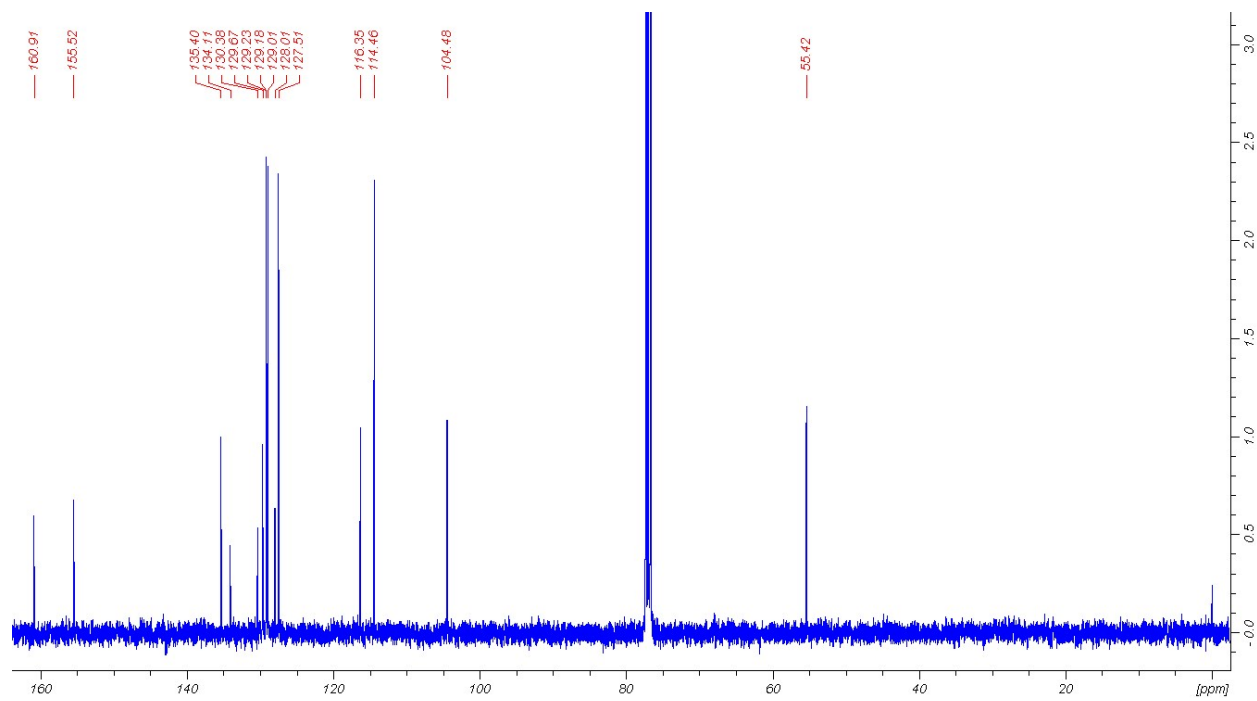

## 4b HRMS

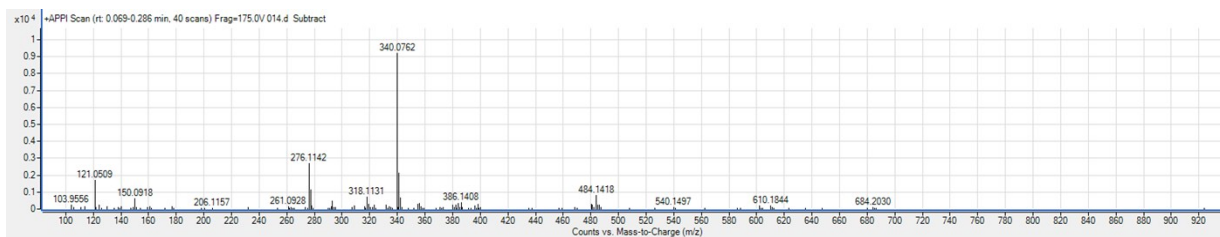

| Formula                                          | Observed m/z | Proposed adduct | Charge | Observed neutral mass | Theoretical neutral mass | Mass error (ppm) |
|--------------------------------------------------|--------------|-----------------|--------|-----------------------|--------------------------|------------------|
| C <sub>19</sub> H <sub>16</sub> O <sub>4</sub> S | 340.0761     | radical         | 1+     | 340.0767              | 340.0769                 | 0.75             |
|                                                  |              |                 |        |                       |                          |                  |
|                                                  |              |                 |        |                       |                          |                  |

**(E)-3-Phenyl-6-(4-(trifluoromethyl)styryl)-1,2-oxathiane 2,2-dioxide 4c <sup>1</sup>H-NMR**

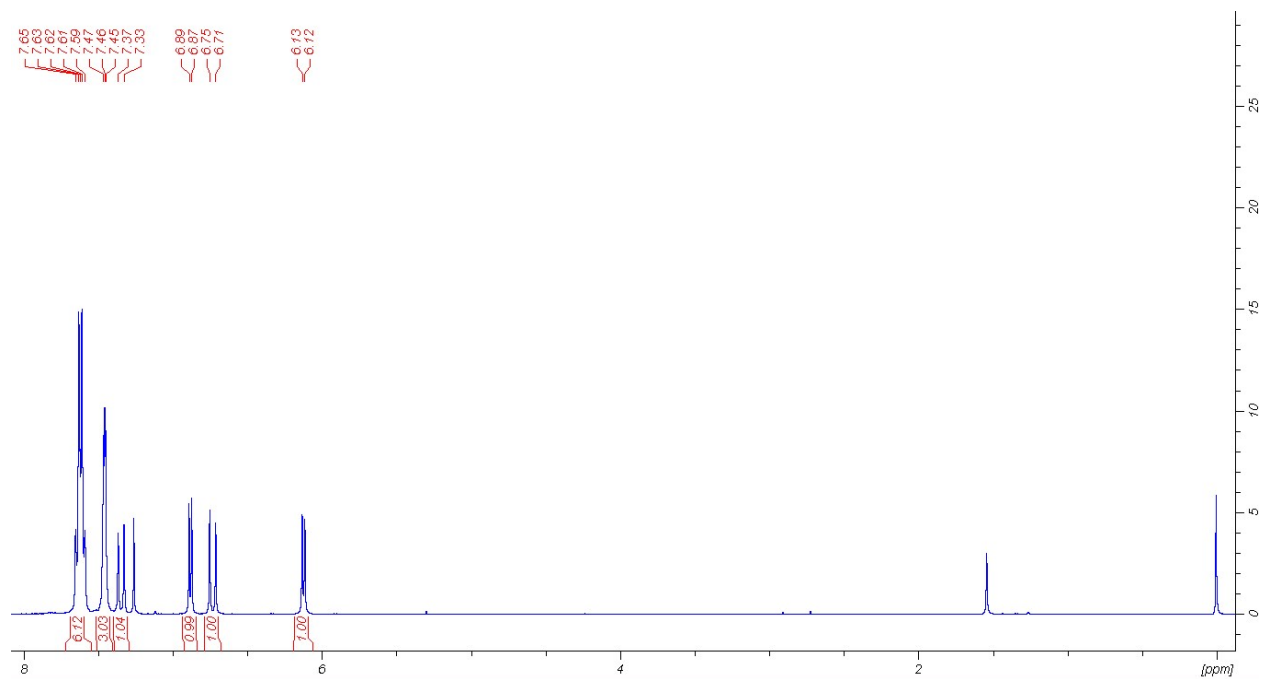

**4c <sup>13</sup>C-NMR**

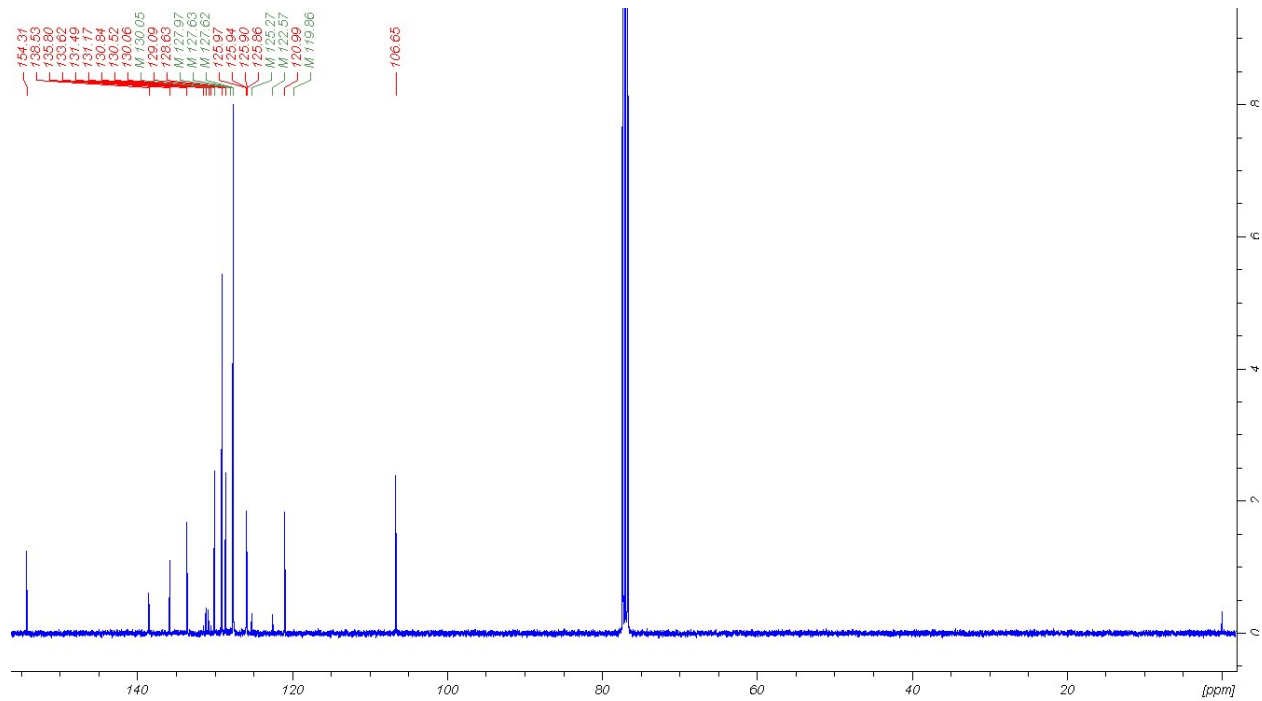



### 4c <sup>19</sup>F-NMR

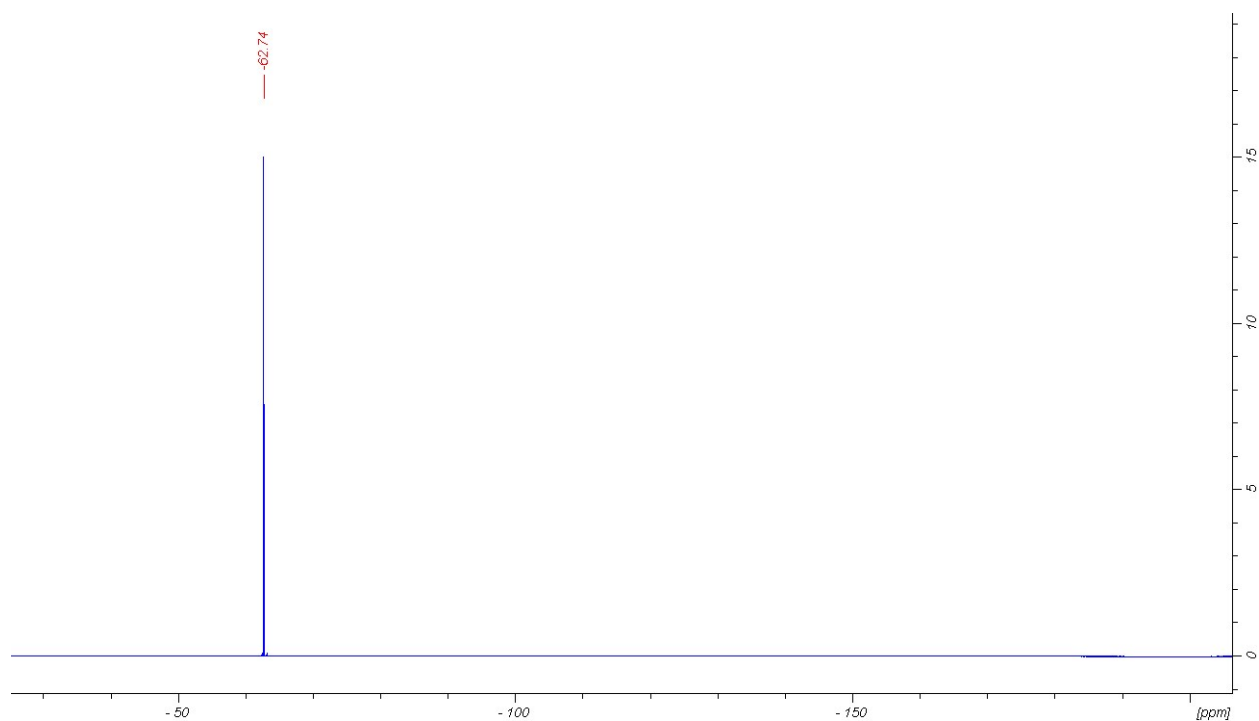

### 4c HRMS

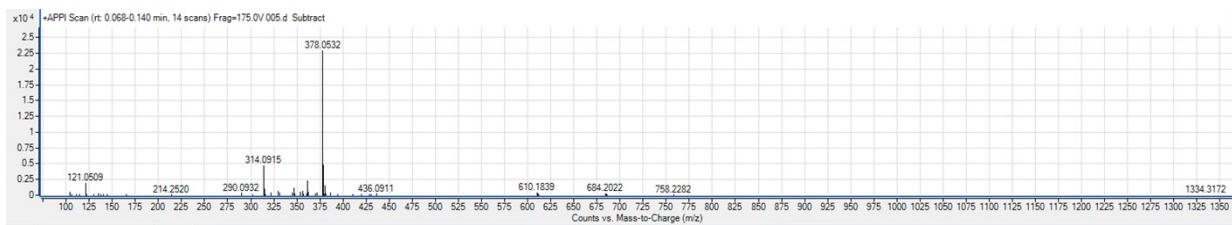

| Formula                                                         | Observed m/z | Proposed adduct | Charge | Observed neutral mass | Theoretical neutral mass | Mass error (ppm) |
|-----------------------------------------------------------------|--------------|-----------------|--------|-----------------------|--------------------------|------------------|
| C <sub>19</sub> H <sub>13</sub> F <sub>3</sub> O <sub>3</sub> S | 378.0532     | radical         | 1+     | 378.0538              | 378.0537                 | 0.17             |
|                                                                 |              |                 |        |                       |                          |                  |
|                                                                 |              |                 |        |                       |                          |                  |

**(E)-6-(4-Nitrostyryl)-3-phenyl-1,2-oxathiane 2,2-dioxide 4d <sup>1</sup>H-NMR**

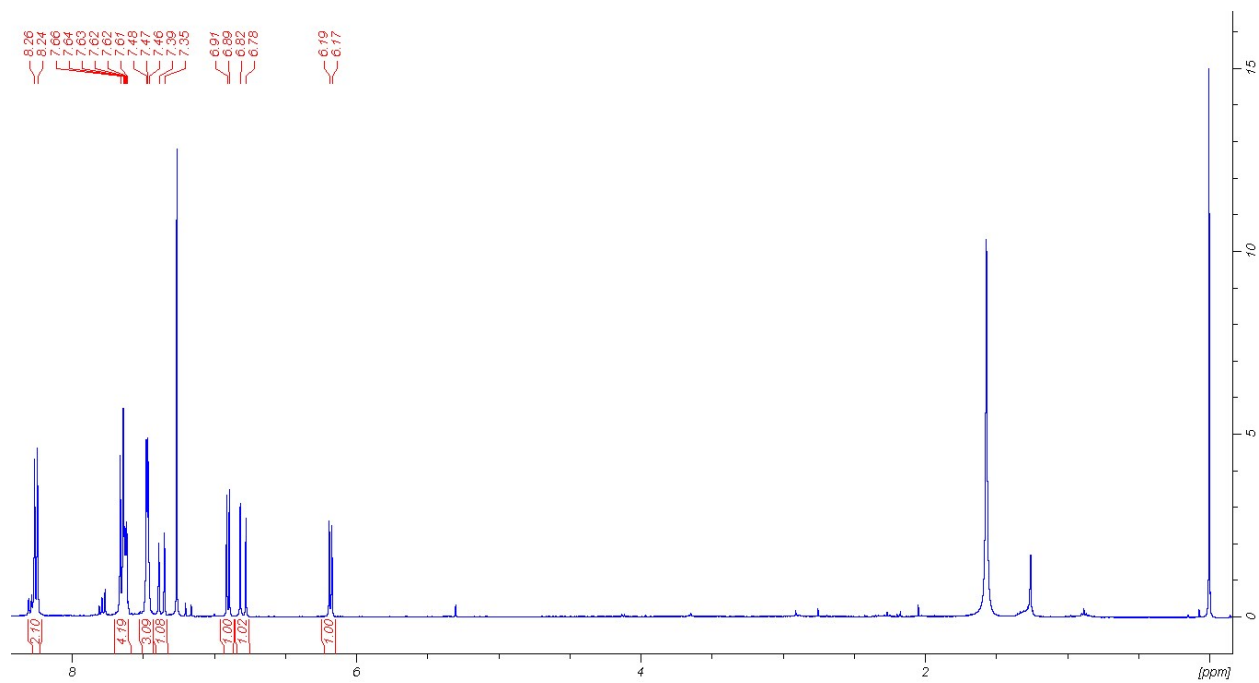

**4d <sup>13</sup>C-NMR**

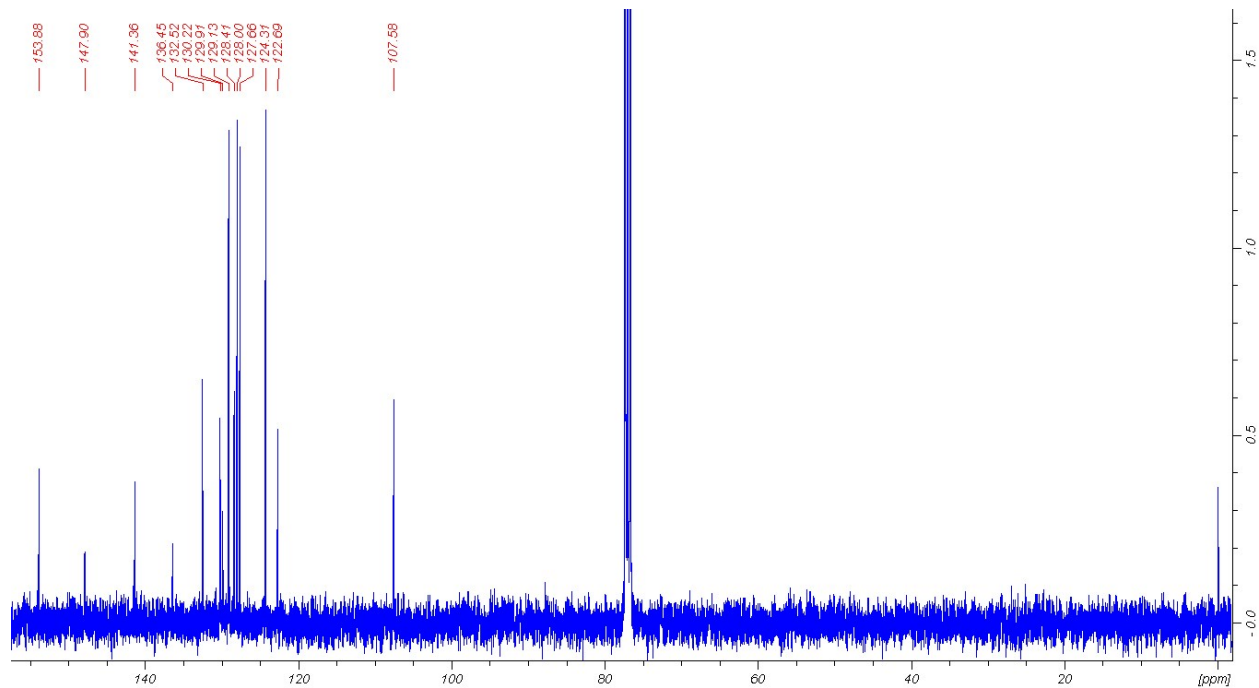

#### 4d HRMS

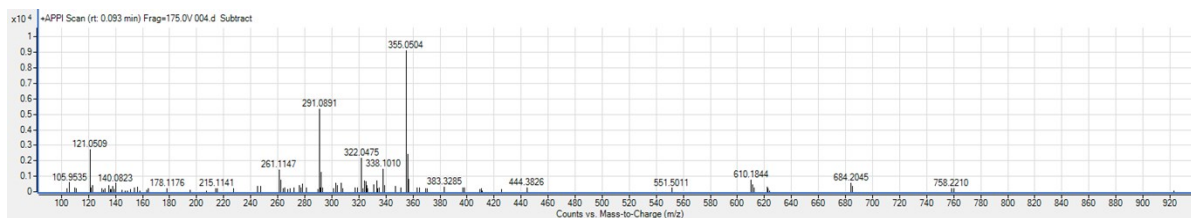

| Formula                                           | Observed m/z | Proposed adduct | Charge | Observed neutral mass | Theoretical neutral mass | Mass error (ppm) |
|---------------------------------------------------|--------------|-----------------|--------|-----------------------|--------------------------|------------------|
| C <sub>18</sub> H <sub>13</sub> NO <sub>5</sub> S | 355.0504     | radical         | 1+     | 355.0508              | 355.0514                 | 1.69             |
|                                                   |              |                 |        |                       |                          |                  |
|                                                   |              |                 |        |                       |                          |                  |

**(E)-6-(2-Bromostyryl)-3-phenyl-1,2-oxathiane 2,2-dioxide 4e <sup>1</sup>H-NMR**

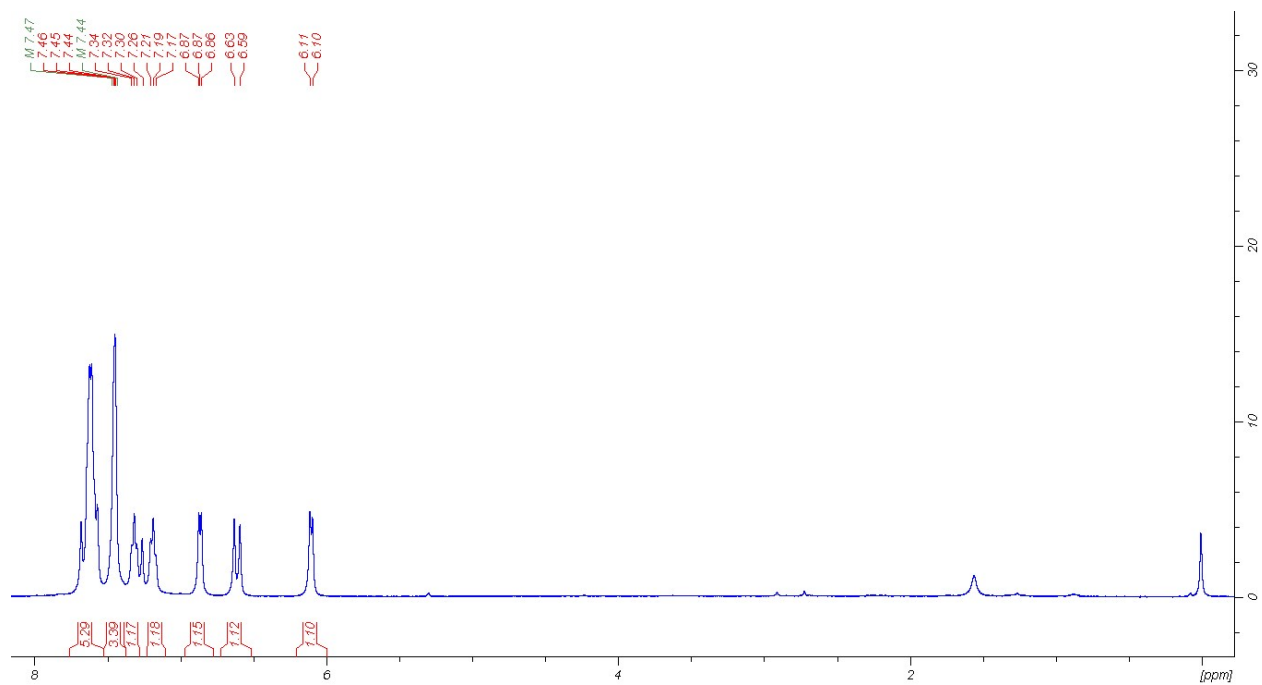

**4e <sup>13</sup>C-NMR**

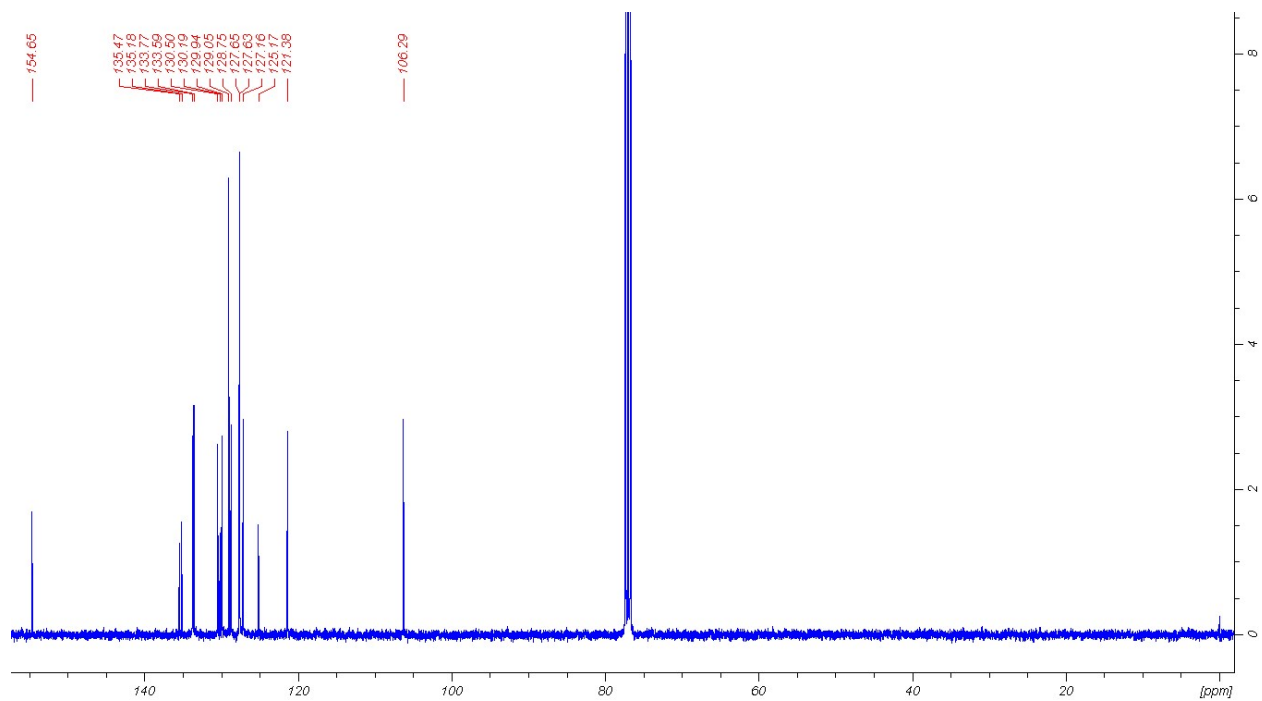

## 4e HRMS

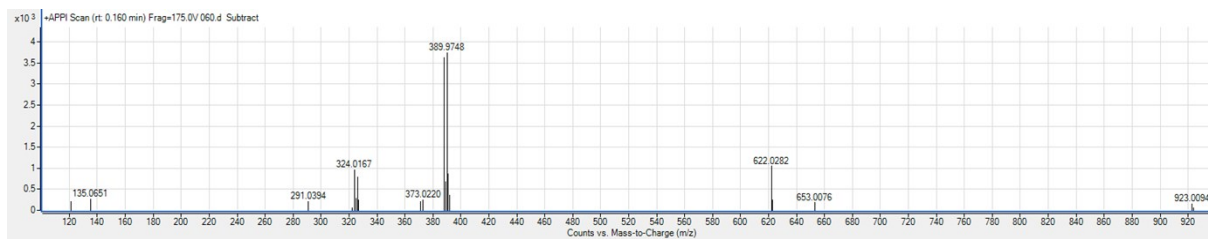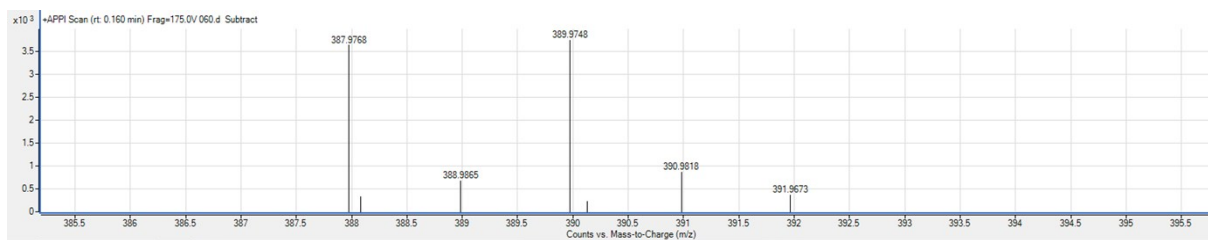

| Formula                                            | Observed m/z | Proposed adduct | Charge | Observed neutral mass | Theoretical neutral mass | Mass error (ppm) |
|----------------------------------------------------|--------------|-----------------|--------|-----------------------|--------------------------|------------------|
| C <sub>18</sub> H <sub>13</sub> BrO <sub>3</sub> S | 389.9748     | radical         | 1+     | 387.9772              | 387.9769                 | 0.87             |
|                                                    |              |                 |        |                       |                          |                  |
|                                                    |              |                 |        |                       |                          |                  |

### 3-Phenyl-6-(phenylethynyl)-1,2-oxathiane 2,2-dioxide 4f <sup>1</sup>H-NMR

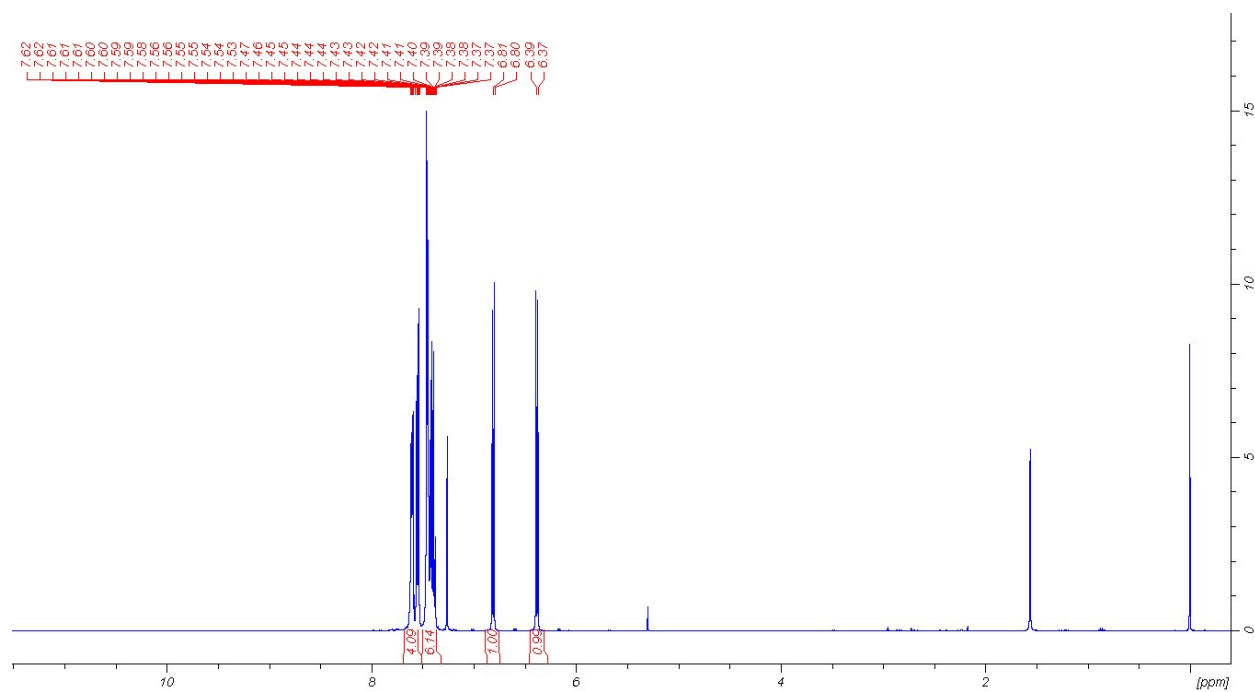

### 4f <sup>13</sup>C-NMR

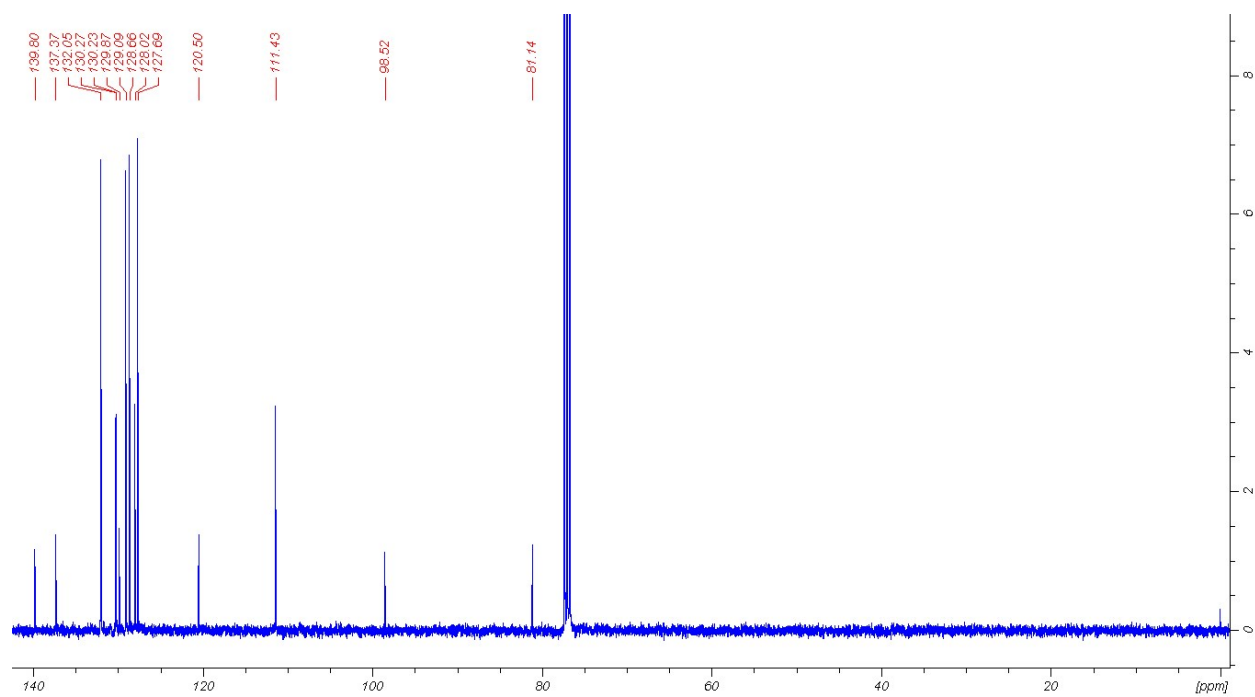

## 4f HRMS

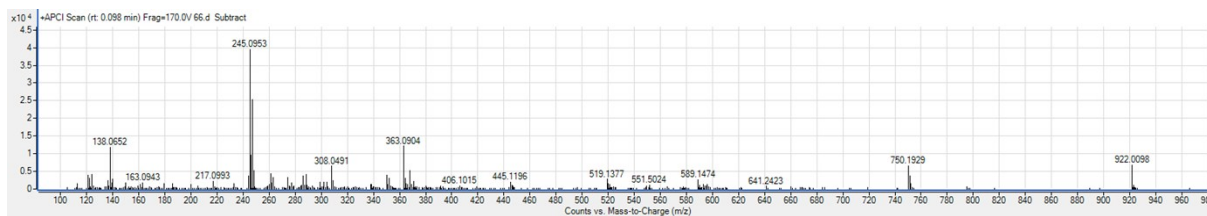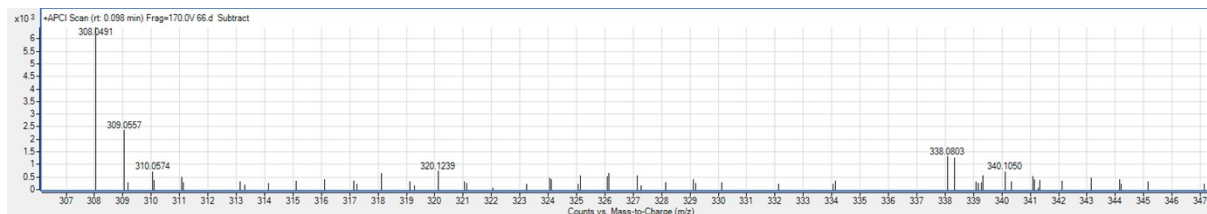

| Formula   | Observed m/z | Proposed adduct | Charge | Observed neutral mass | Theoretical neutral mass | Mass error (ppm) |
|-----------|--------------|-----------------|--------|-----------------------|--------------------------|------------------|
| C18H12O3S | 308.0491     | radical         | 1+     | 308.0496              | 308.0507                 | 3.57             |
|           |              |                 |        |                       |                          |                  |
|           |              |                 |        |                       |                          |                  |

**(E)-6-styryl-1,2-oxathiine 2,2-dioxide 4g <sup>1</sup>H-NMR**

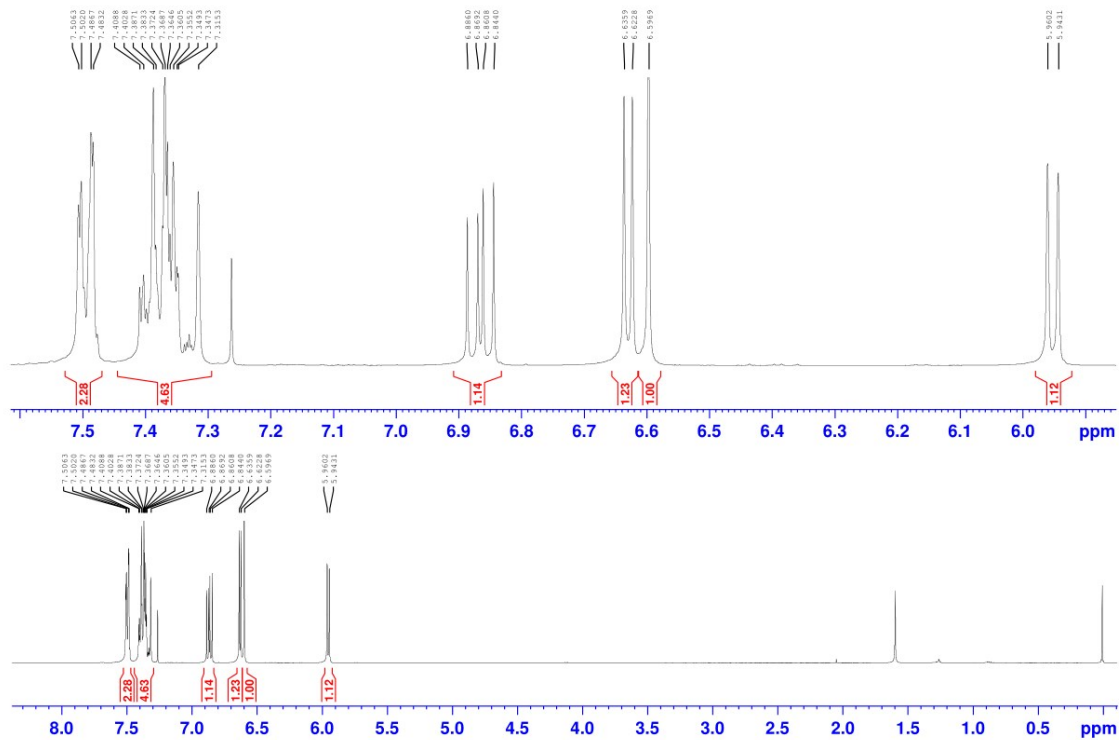

**4g <sup>13</sup>C-NMR**

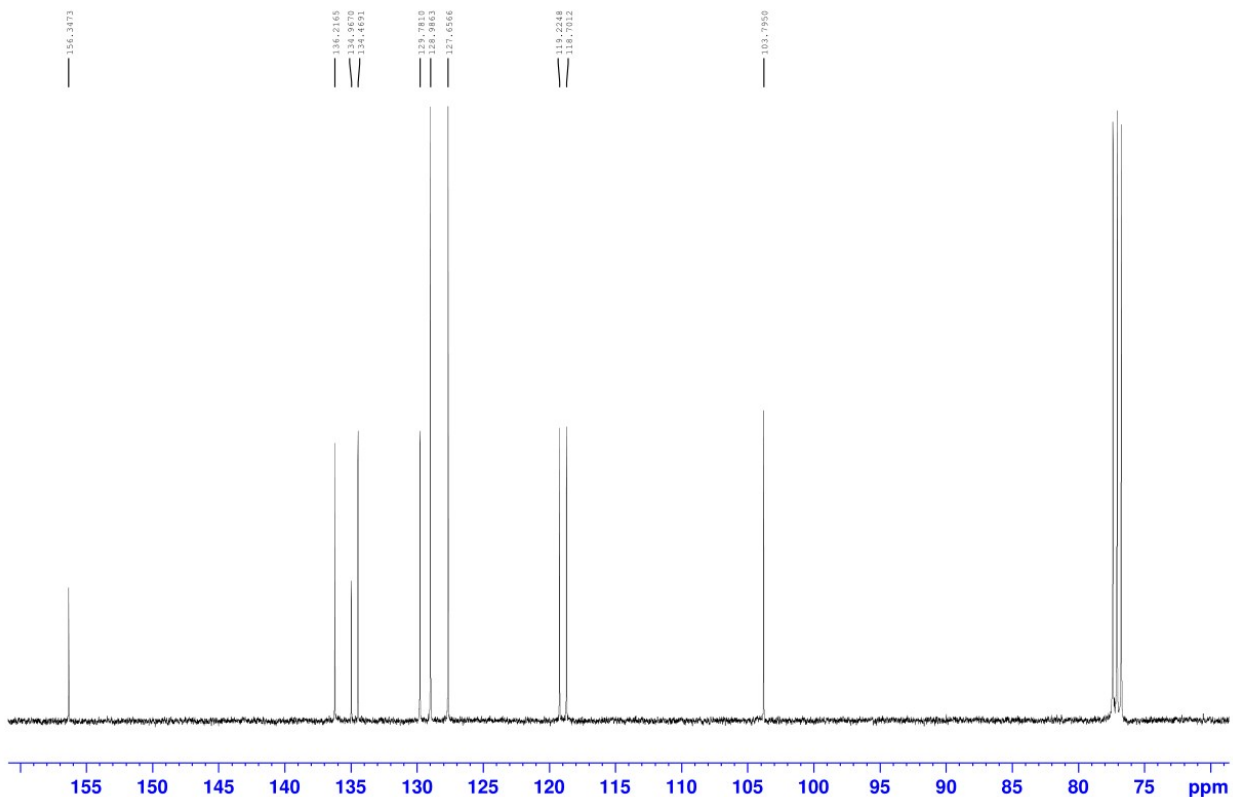



## 4g HRMS

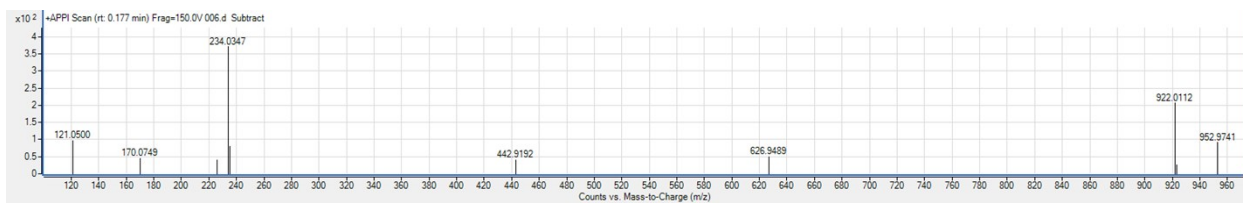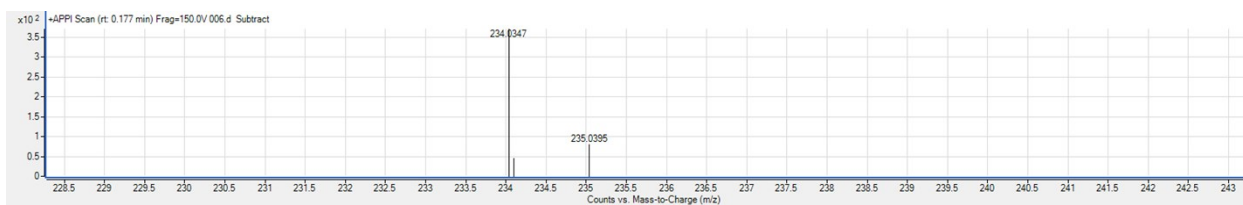

| Formula   | Observed m/z | Proposed adduct | Charge | Observed neutral mass | Theoretical neutral mass | Mass error (ppm) |
|-----------|--------------|-----------------|--------|-----------------------|--------------------------|------------------|
| C12H10O3S | 234.0347     | radical         | 1+     | 234.0352              | 234.0351                 | 0.43             |
|           |              |                 |        |                       |                          |                  |
|           |              |                 |        |                       |                          |                  |

**(E)-6-Styryl-3-(4-(trifluoromethyl)phenyl)-1,2-oxathiane 2,2-dioxide 4h <sup>1</sup>H-NMR**

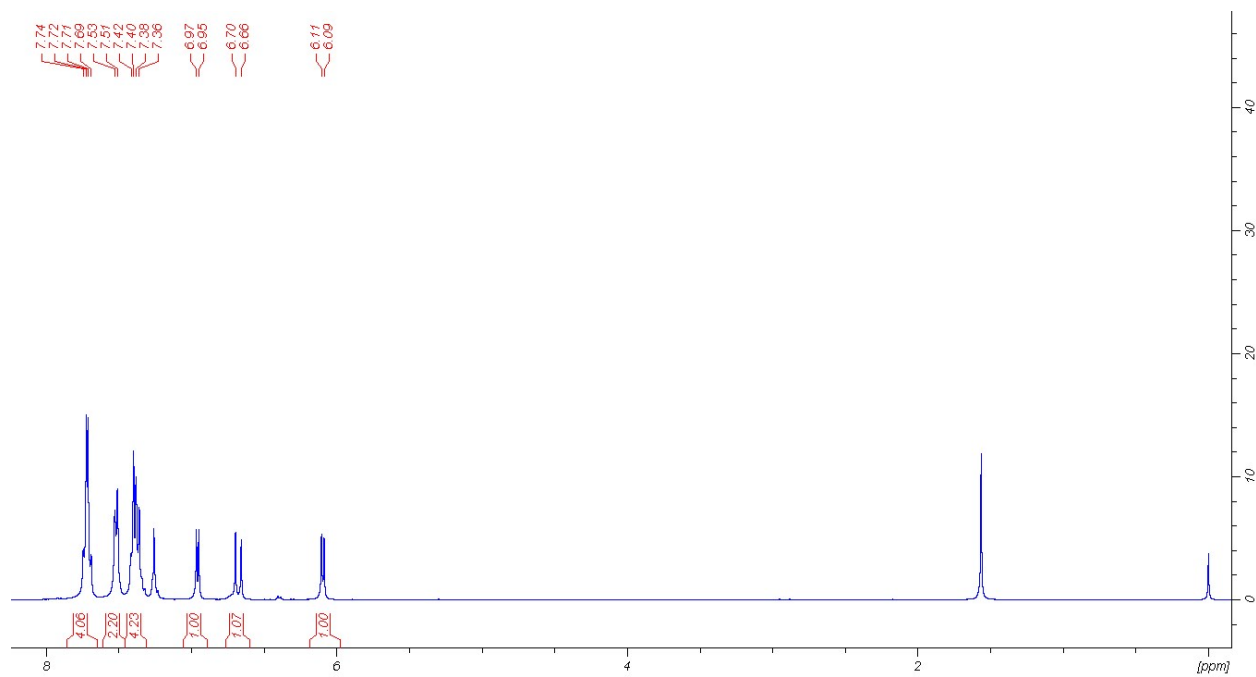

**4h <sup>13</sup>C-NMR**

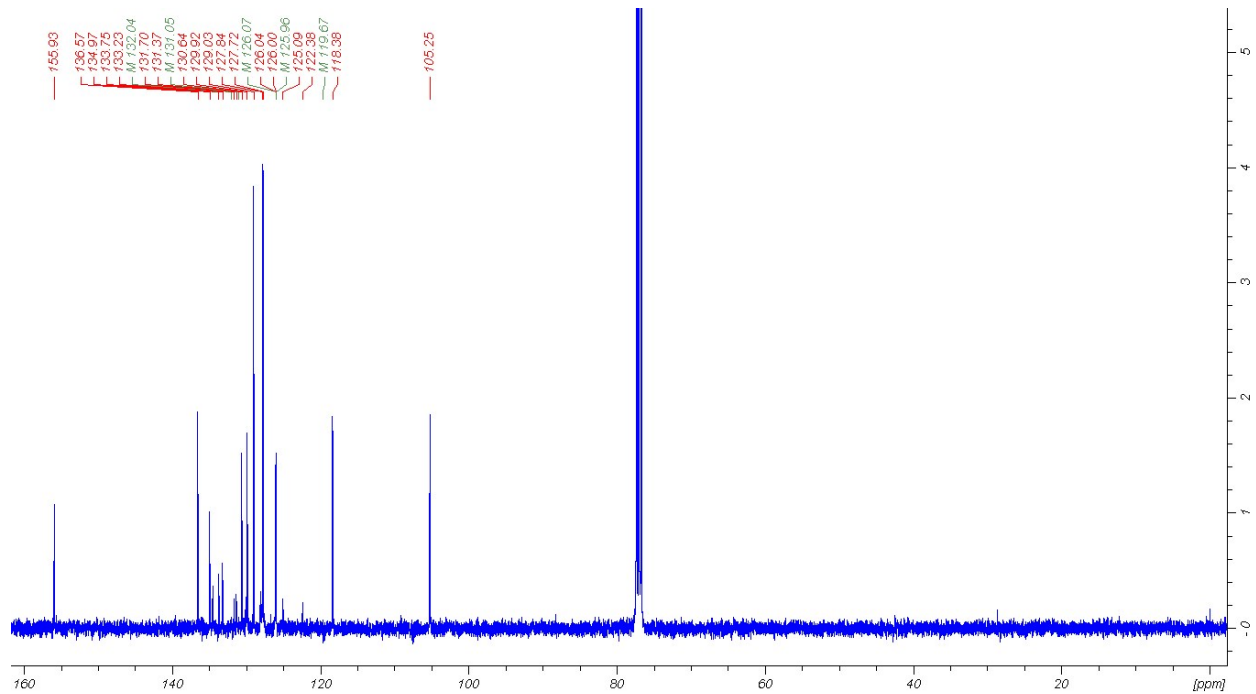

### 4h <sup>19</sup>F-NMR

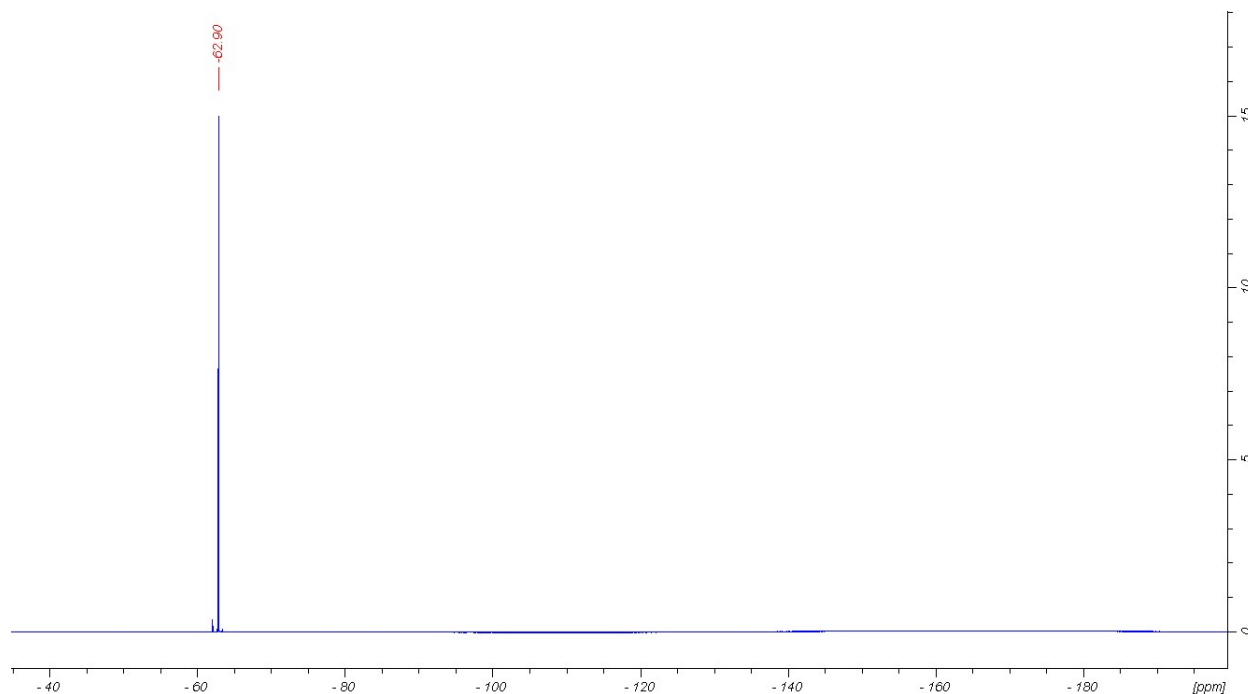

### 4h HRMS

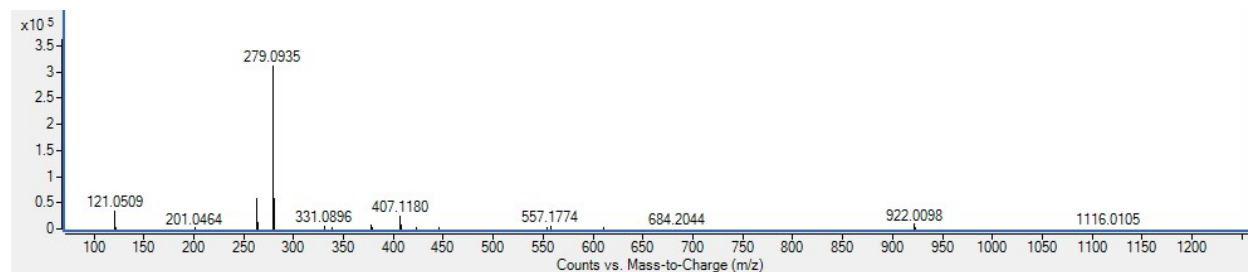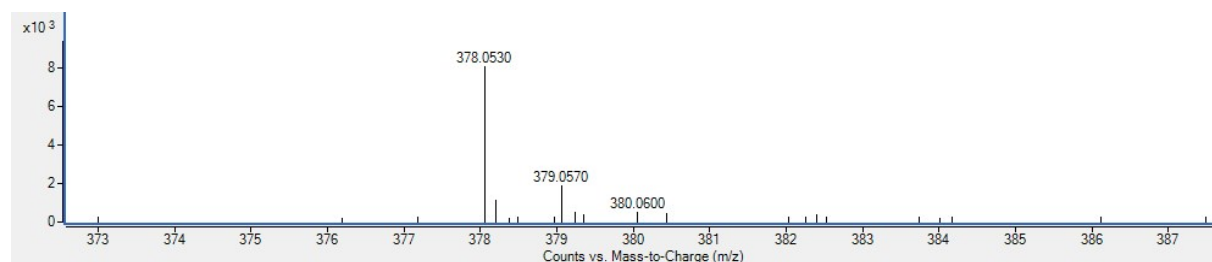

| Formula                                                         | Observed m/z | Proposed adduct | Charge | Observed neutral mass | Theoretical neutral mass | Mass error (ppm) |
|-----------------------------------------------------------------|--------------|-----------------|--------|-----------------------|--------------------------|------------------|
| C <sub>19</sub> H <sub>13</sub> F <sub>3</sub> O <sub>3</sub> S | 378.0530     | radical         | 1+     | 378.0535              | 378.0537                 | 0.53             |
|                                                                 |              |                 |        |                       |                          |                  |
|                                                                 |              |                 |        |                       |                          |                  |

### 3,5,6-(Triphenyl)-1,2-oxathiine 2,2-dioxide 6a <sup>1</sup>H-NMR

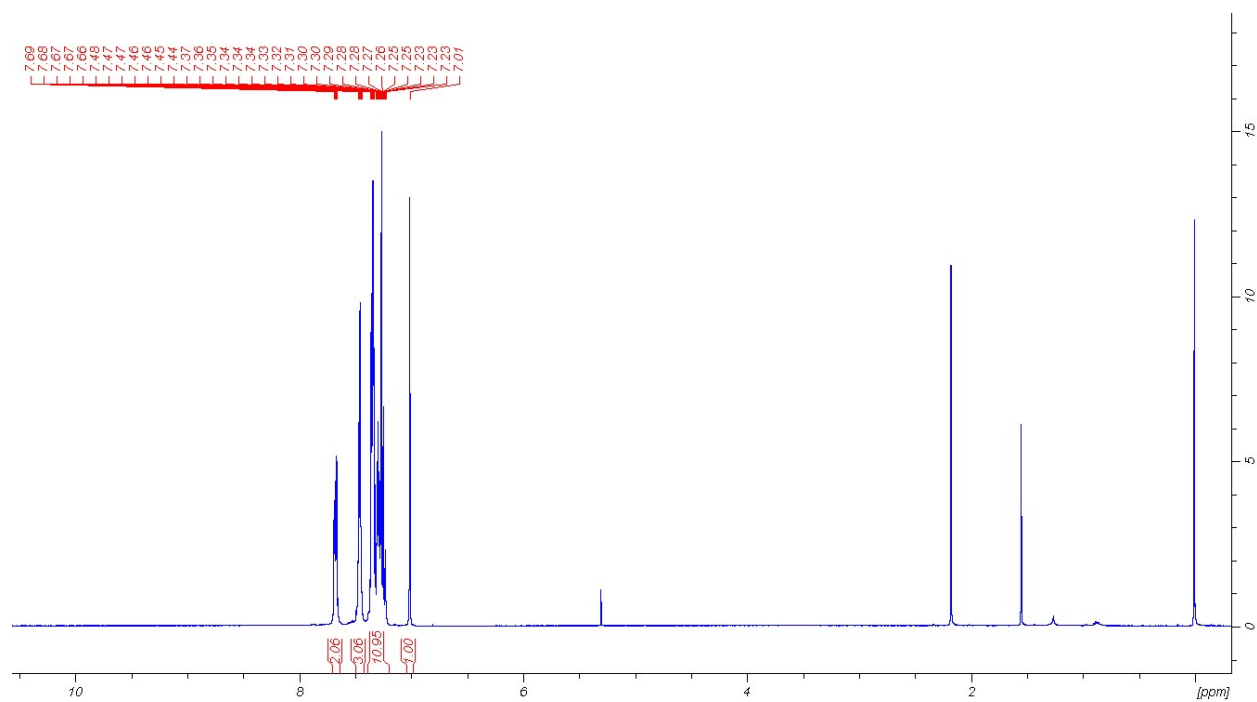

### 6a <sup>13</sup>C-NMR

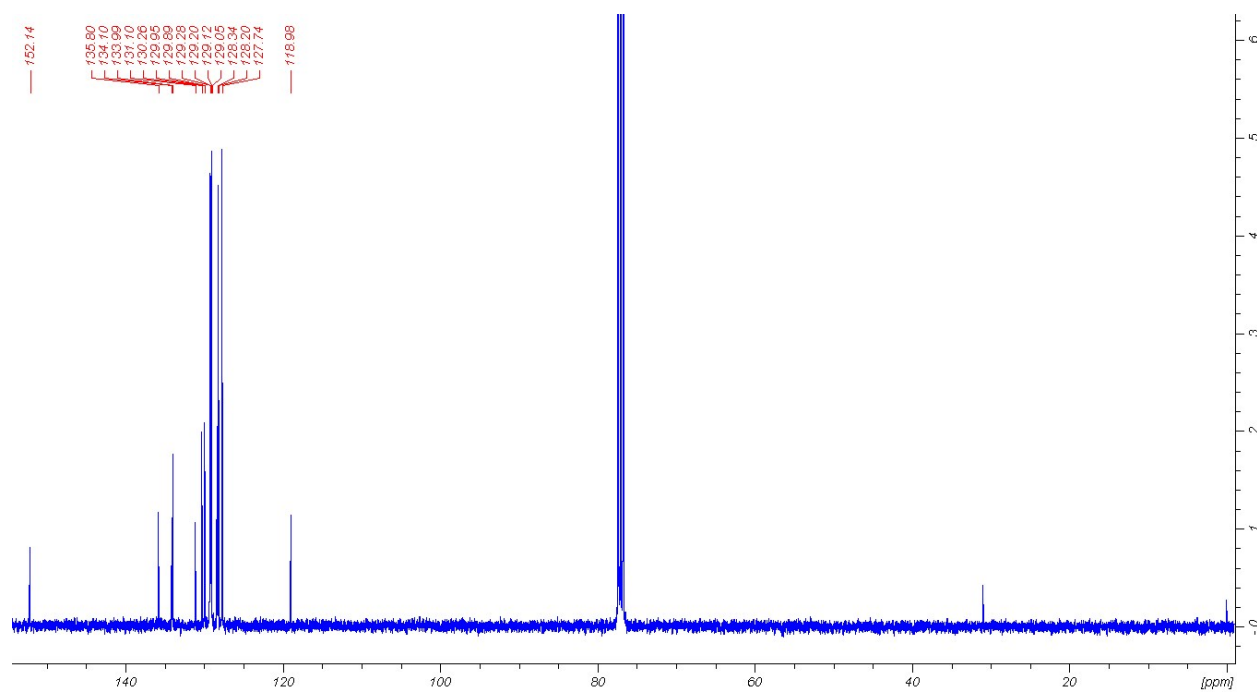

## 6a HRMS

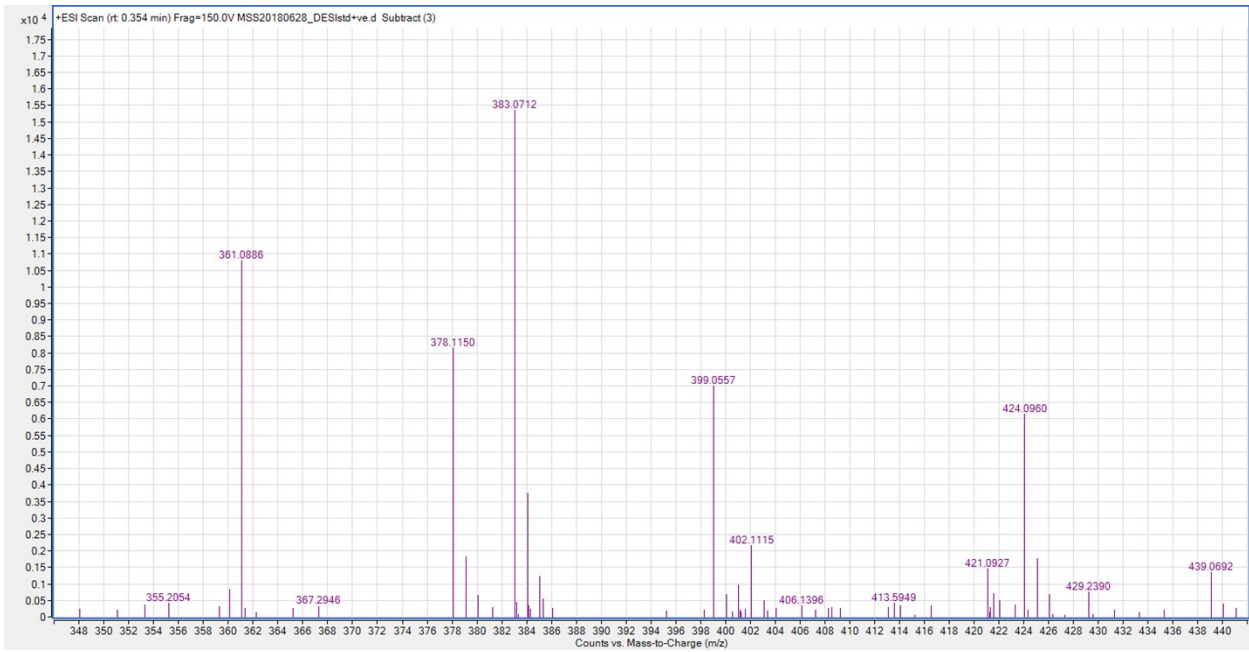

| Formula                                           | Species                           | m/z             | Mass            | Mass (MFG)     | Score        | Diff (ppm)  |
|---------------------------------------------------|-----------------------------------|-----------------|-----------------|----------------|--------------|-------------|
| C <sub>20</sub> H <sub>18</sub> O <sub>3</sub> S  | (M+Na) <sup>+</sup>               | 361.0886        | 338.0983        | 338.0977       | 75.3         | -1.97       |
| C <sub>17</sub> H <sub>22</sub> O <sub>4</sub> S  | (M+K) <sup>+</sup>                | 361.0886        | 322.1244        | 322.1239       | 67.68        | -1.7        |
| <b>C<sub>22</sub>H<sub>16</sub>O<sub>3</sub>S</b> | <b>(M+H)<sup>+</sup></b>          | <b>361.0886</b> | <b>360.0803</b> | <b>360.082</b> | <b>64.31</b> | <b>4.87</b> |
| C <sub>25</sub> H <sub>12</sub> O <sub>3</sub>    | (M+H) <sup>+</sup>                | 361.0886        | 360.0801        | 360.0786       | 59.8         | -3.99       |
| C <sub>25</sub> H <sub>11</sub> S                 | (M+NH <sub>4</sub> ) <sup>+</sup> | 361.0886        | 343.0537        | 343.0581       | 33.76        | 12.92       |

### 3-(4-Methoxyphenyl)-5,6-diphenyl-1,2-oxathiane 2,2-dioxide 6b <sup>1</sup>H-NMR

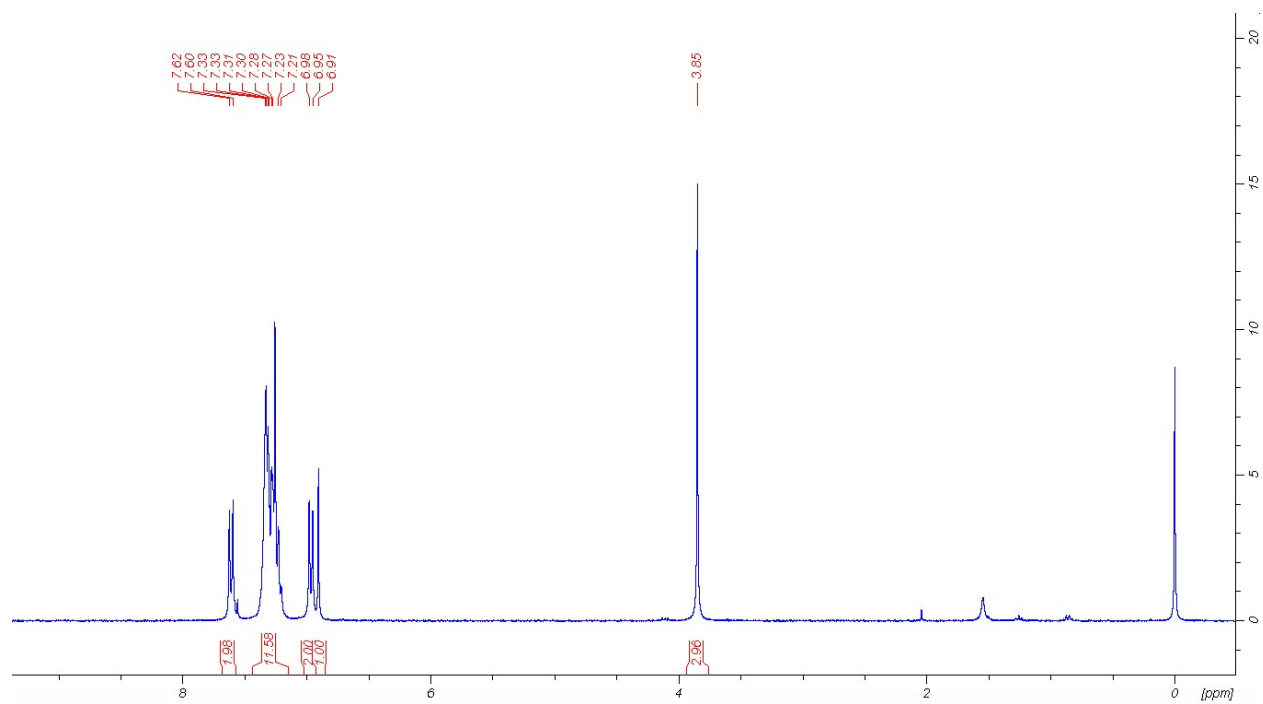

### 6b <sup>13</sup>C-NMR

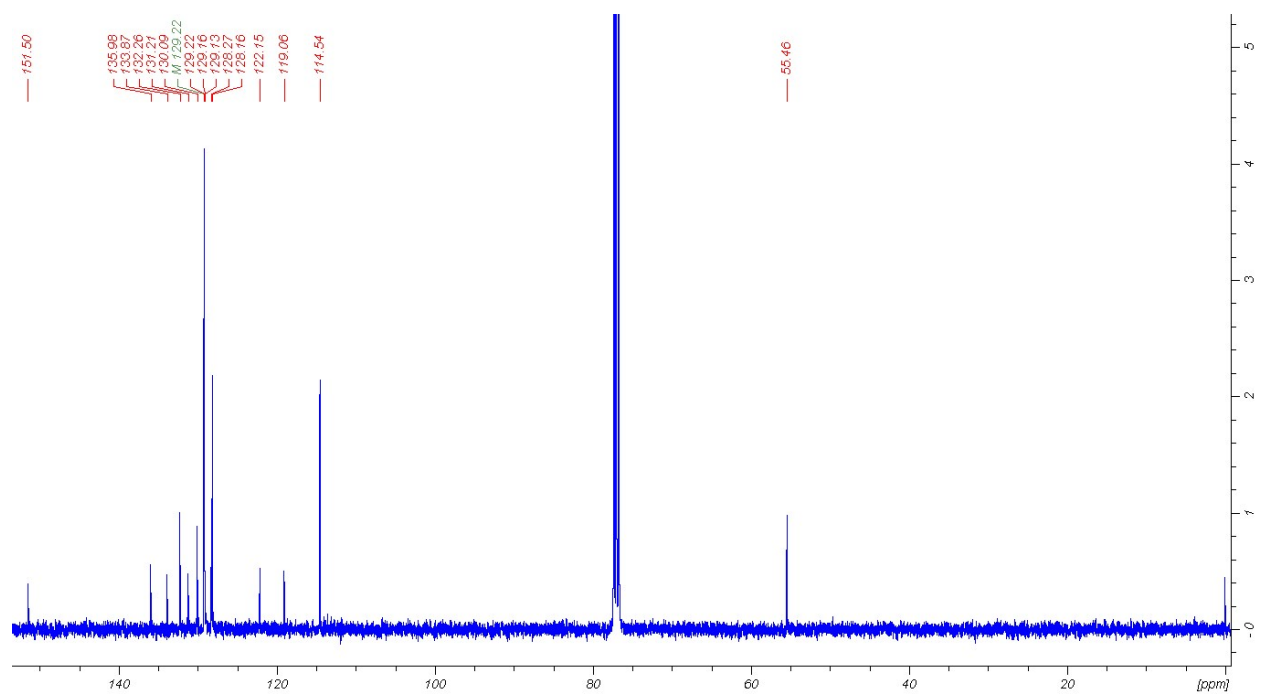

## 6b HRMS

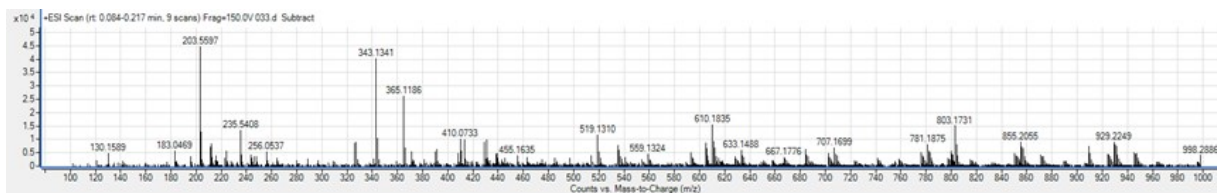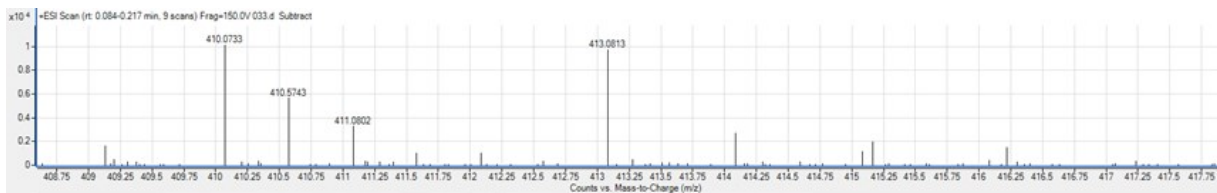

| Formula                                          | Observed m/z | Proposed adduct | Charge         | Observed neutral mass | Theoretical neutral mass | Mass error (ppm) |
|--------------------------------------------------|--------------|-----------------|----------------|-----------------------|--------------------------|------------------|
| C <sub>23</sub> H <sub>18</sub> O <sub>4</sub> S | 413.0813     | Na <sup>+</sup> | 1 <sup>+</sup> | 390.0923              | 390.0926                 | 0.76             |
|                                                  |              |                 |                |                       |                          |                  |
|                                                  |              |                 |                |                       |                          |                  |

### 5,6-Diphenyl-3-((4-trifluoromethyl)phenyl)-1,2-oxathiane 2,2 dioxide 6c <sup>1</sup>H-NMR

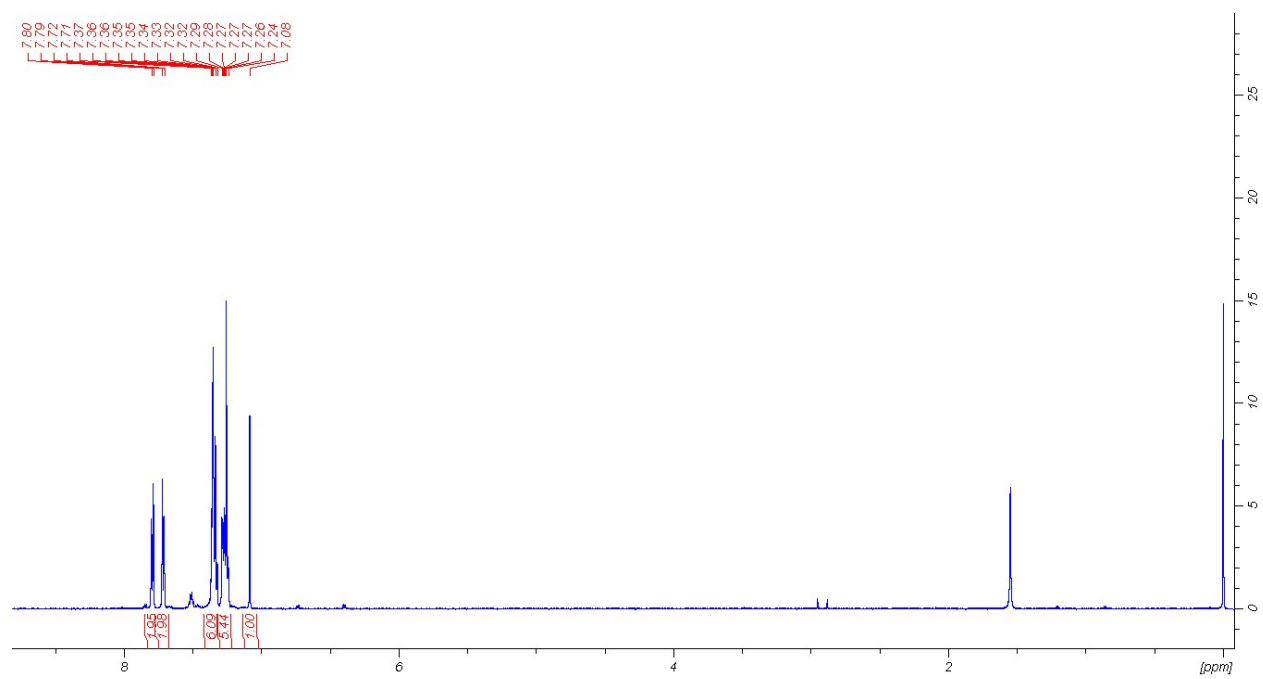

### 6c <sup>13</sup>C-NMR

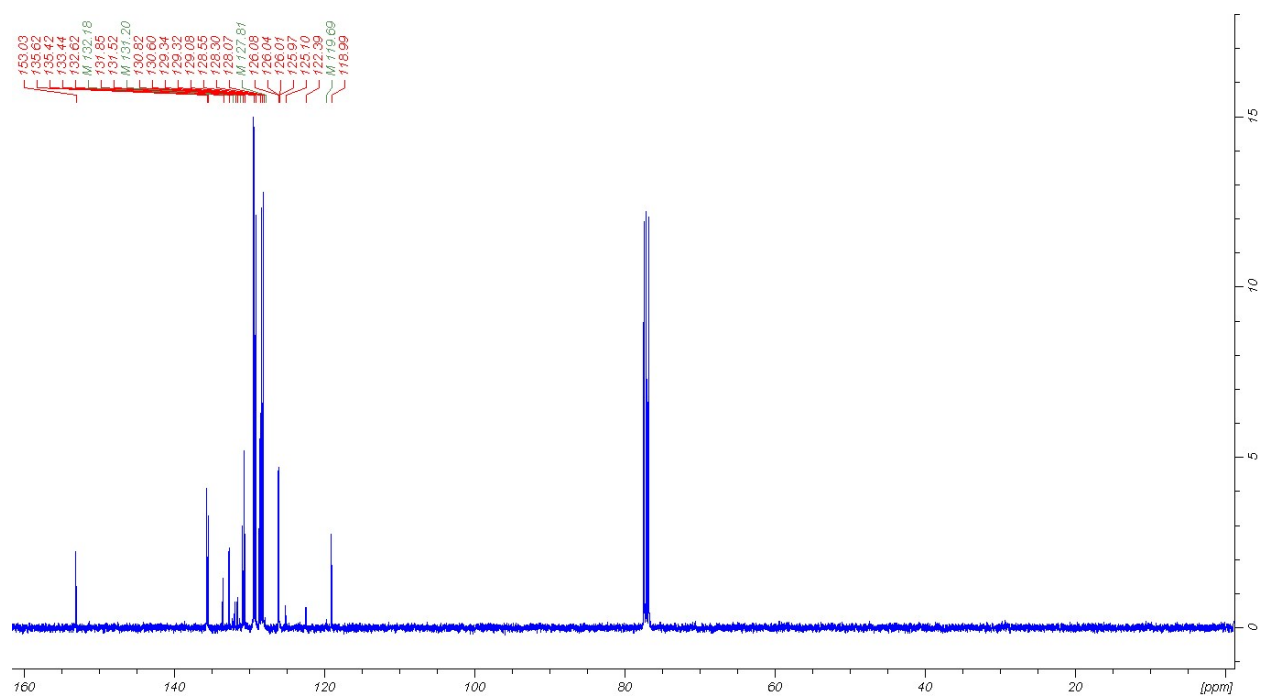



### 6c <sup>19</sup>F-NMR

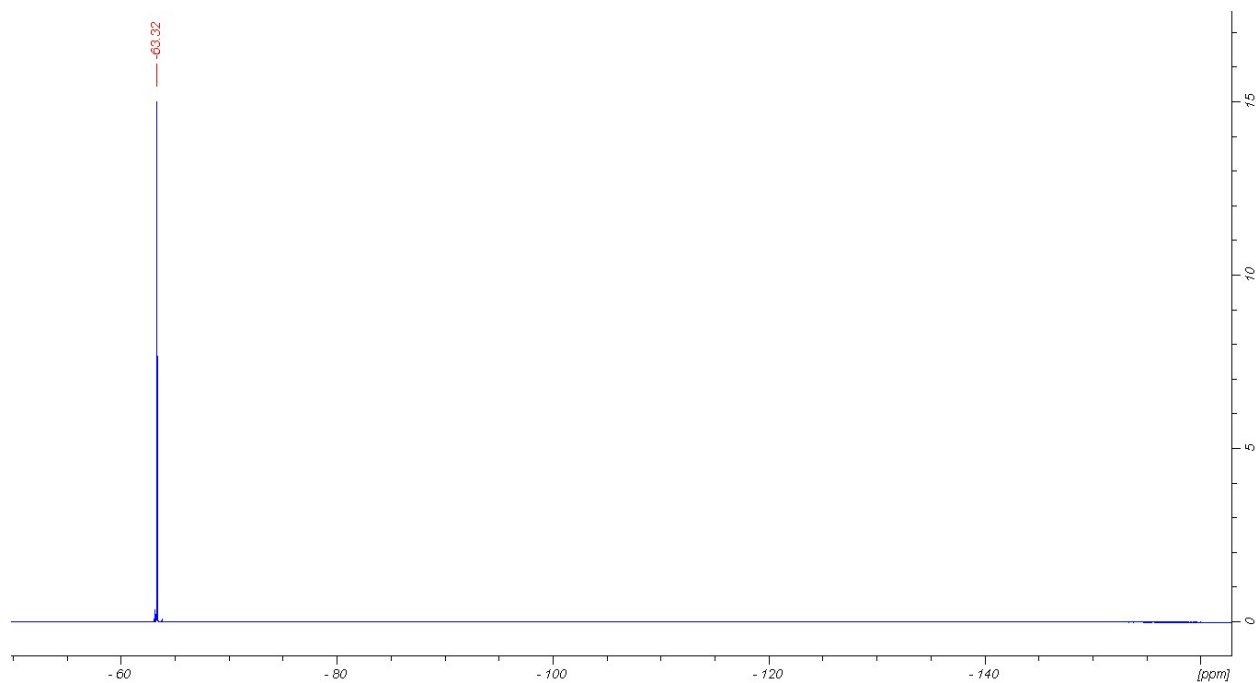

### 6c HRMS

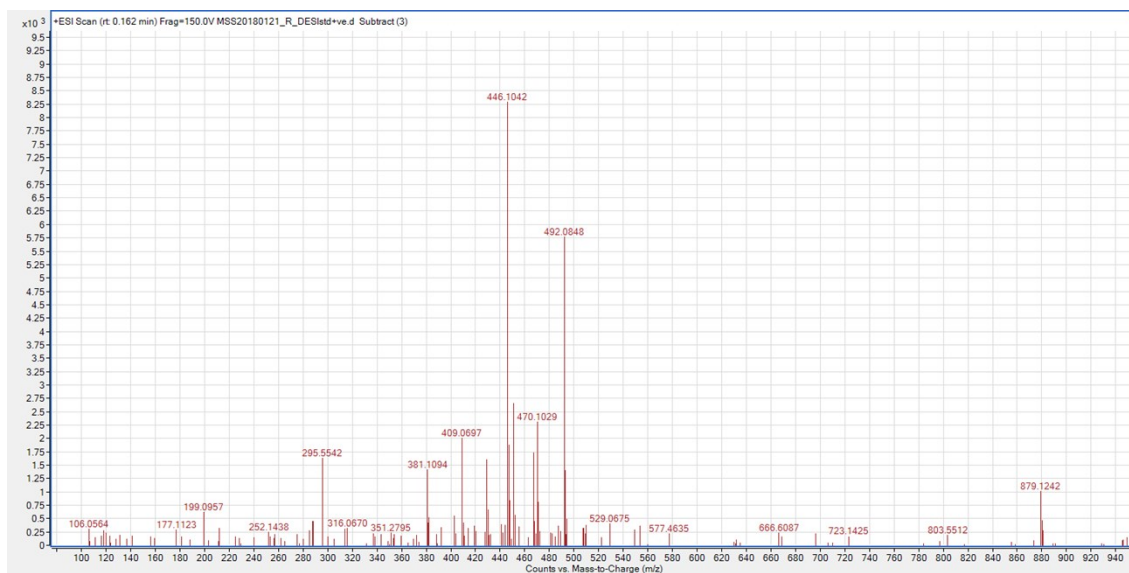

| Best | Formula                                                                      | Species                           | m/z      | Mass     | Mass (MFG) | Score | Diff (ppm) |
|------|------------------------------------------------------------------------------|-----------------------------------|----------|----------|------------|-------|------------|
| ●    | C <sub>23</sub> H <sub>15</sub> F <sub>3</sub> O <sub>3</sub> S              | (M+NH <sub>4</sub> ) <sup>+</sup> | 446.1042 | 428.0707 | 428.0694   | 90.21 | -3.04      |
| ○    | C <sub>23</sub> H <sub>18</sub> F <sub>2</sub> O <sub>2</sub> S <sub>2</sub> | (M+NH <sub>4</sub> ) <sup>+</sup> | 446.1042 | 428.0708 | 428.0716   | 90.17 | 1.82       |
| ○    | C <sub>25</sub> H <sub>16</sub> O <sub>5</sub> S                             | (M+NH <sub>4</sub> ) <sup>+</sup> | 446.1042 | 428.0707 | 428.0718   | 88.76 | 2.77       |
| ○    | C <sub>26</sub> H <sub>17</sub> F O S <sub>2</sub>                           | (M+NH <sub>4</sub> ) <sup>+</sup> | 446.1042 | 428.0708 | 428.0705   | 87.95 | -0.76      |
| ○    | C <sub>20</sub> H <sub>19</sub> F <sub>3</sub> O <sub>3</sub> S <sub>2</sub> | (M+NH <sub>4</sub> ) <sup>+</sup> | 446.1042 | 428.0709 | 428.0728   | 85.35 | 4.4        |

### 5,6-Diphenyl-3-(pyridin-4-yl)-1,2-oxathiane 2,2-dioxide 6d <sup>1</sup>H-NMR

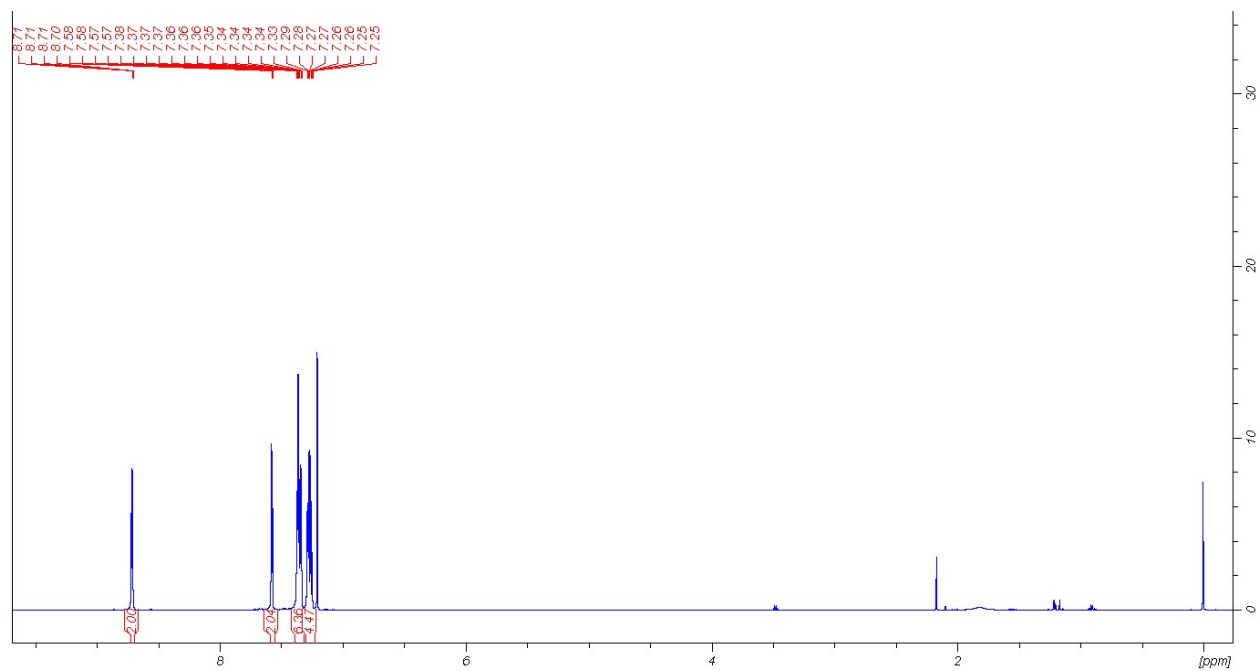

### 6d <sup>13</sup>C-NMR

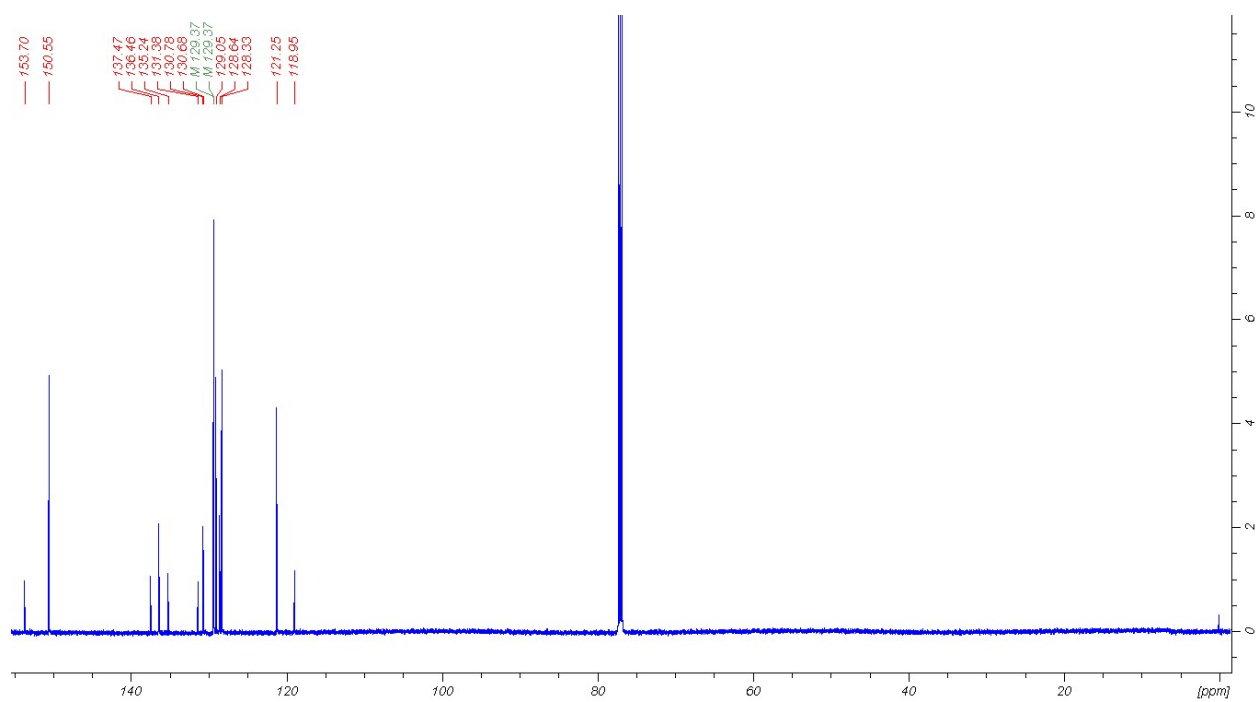

## 6d HRMS

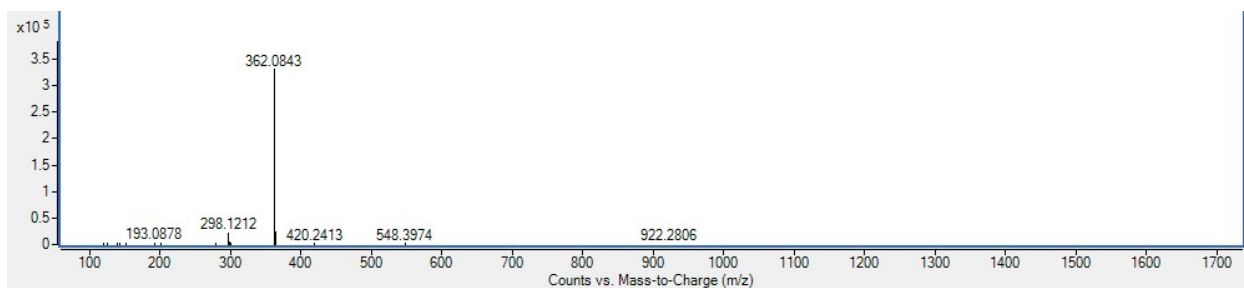

| Formula                                           | Observed m/z | Proposed adduct | Charge | Observed neutral mass | Theoretical neutral mass | Mass error (ppm) |
|---------------------------------------------------|--------------|-----------------|--------|-----------------------|--------------------------|------------------|
| C <sub>21</sub> H <sub>15</sub> NO <sub>3</sub> S | 362.0843     | H+              | 1+     | 361.0771              | 361.0773                 | 0.55             |
|                                                   |              |                 |        |                       |                          |                  |
|                                                   |              |                 |        |                       |                          |                  |

### 3,6-Diphenyl-1,2-oxathiane 2,2-dioxide 6e <sup>1</sup>H-NMR

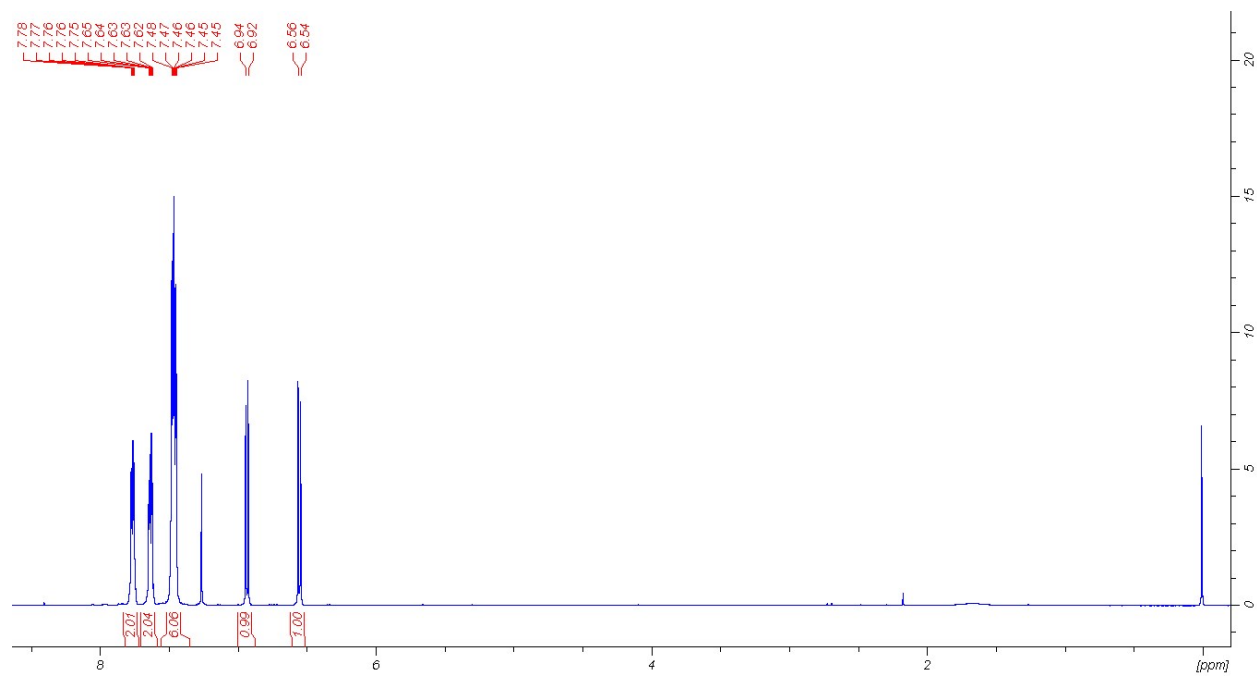

### 6e <sup>13</sup>C-NMR

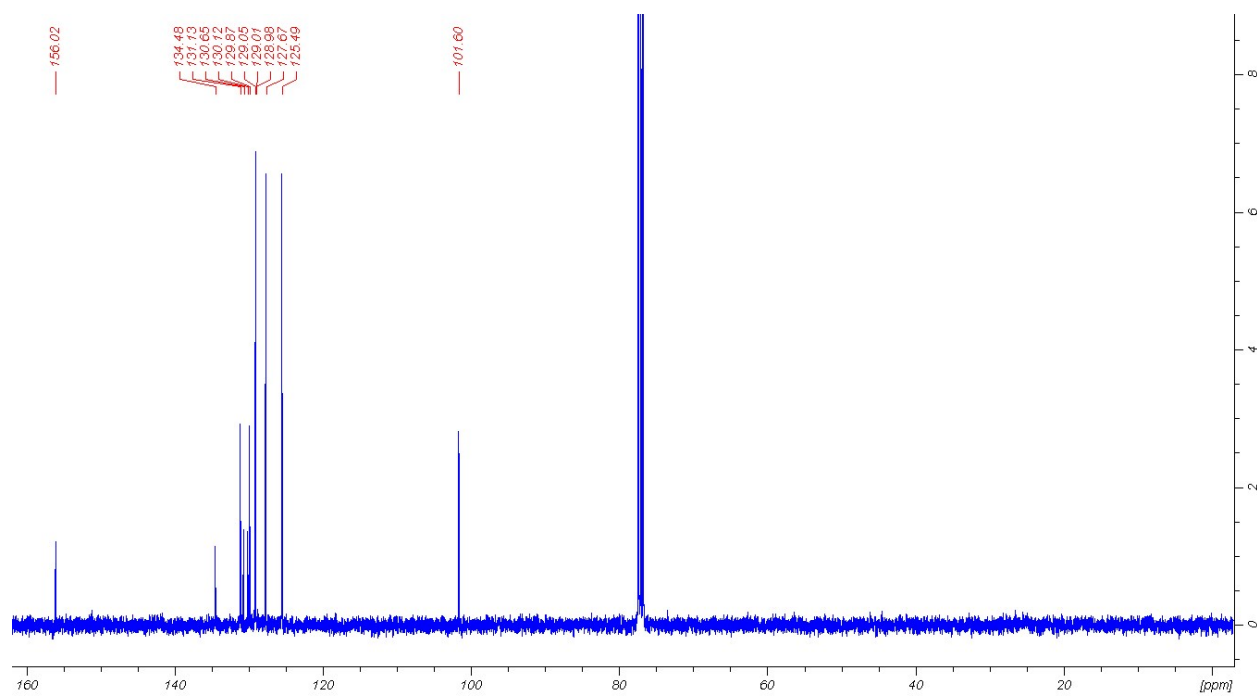

## 6e HRMS

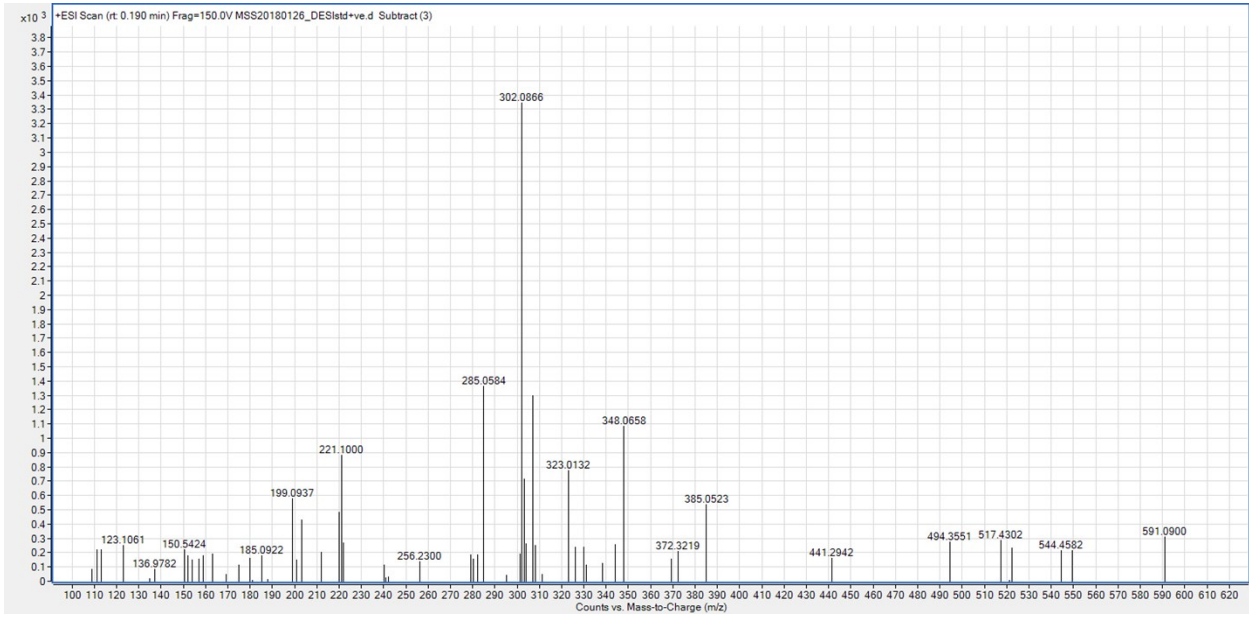

| Best                             | Formula         | Species              | m/z      | Mass     | Mass (MFG) | Score | Diff (ppm) |
|----------------------------------|-----------------|----------------------|----------|----------|------------|-------|------------|
| <input type="radio"/>            | C19 H10 N S     | (M+NH4) <sup>+</sup> | 302.0866 | 284.0526 | 284.0534   | 95.2  | 2.7        |
| <input type="radio"/>            | C13 H16 O3 S2   | (M+NH4) <sup>+</sup> | 302.0866 | 284.0528 | 284.0541   | 85.34 | 4.63       |
| <input checked="" type="radio"/> | C16 H12 O3 S    | (M+NH4) <sup>+</sup> | 302.0866 | 284.0526 | 284.0507   | 85.19 | -6.74      |
| <input type="radio"/>            | C22 H6 N        | (M+NH4) <sup>+</sup> | 302.0866 | 284.0522 | 284.05     | 67.47 | -7.57      |
| <input type="radio"/>            | C8 H16 N2 O5 S2 | (M+NH4) <sup>+</sup> | 302.0866 | 284.0529 | 284.0501   | 60.54 | -9.92      |
| <input type="radio"/>            | C15 H10 N O5    | (M+NH4) <sup>+</sup> | 302.0866 | 284.0522 | 284.0559   | 52.29 | 12.87      |

### 5,6-Bis(4-methoxyphenyl)-3-(pyridin-4-yl)-1,2-oxathiane 2,2-dioxide 6f <sup>1</sup>H-NMR

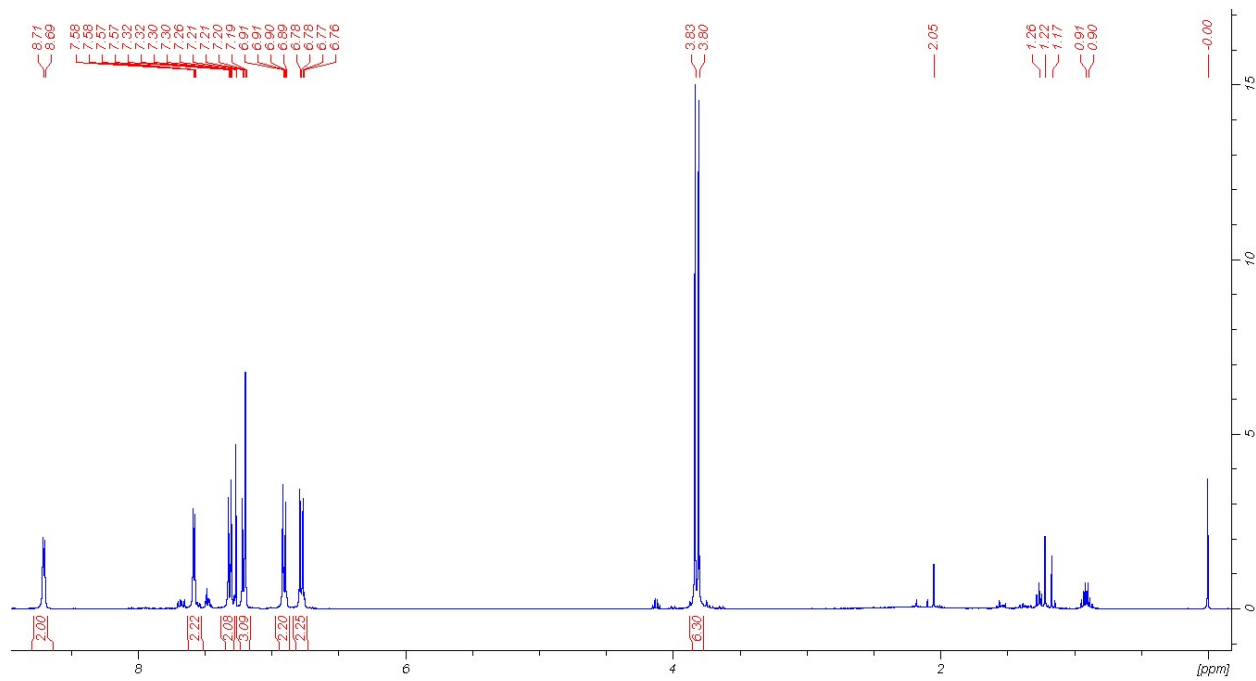

### 6f <sup>13</sup>C-NMR

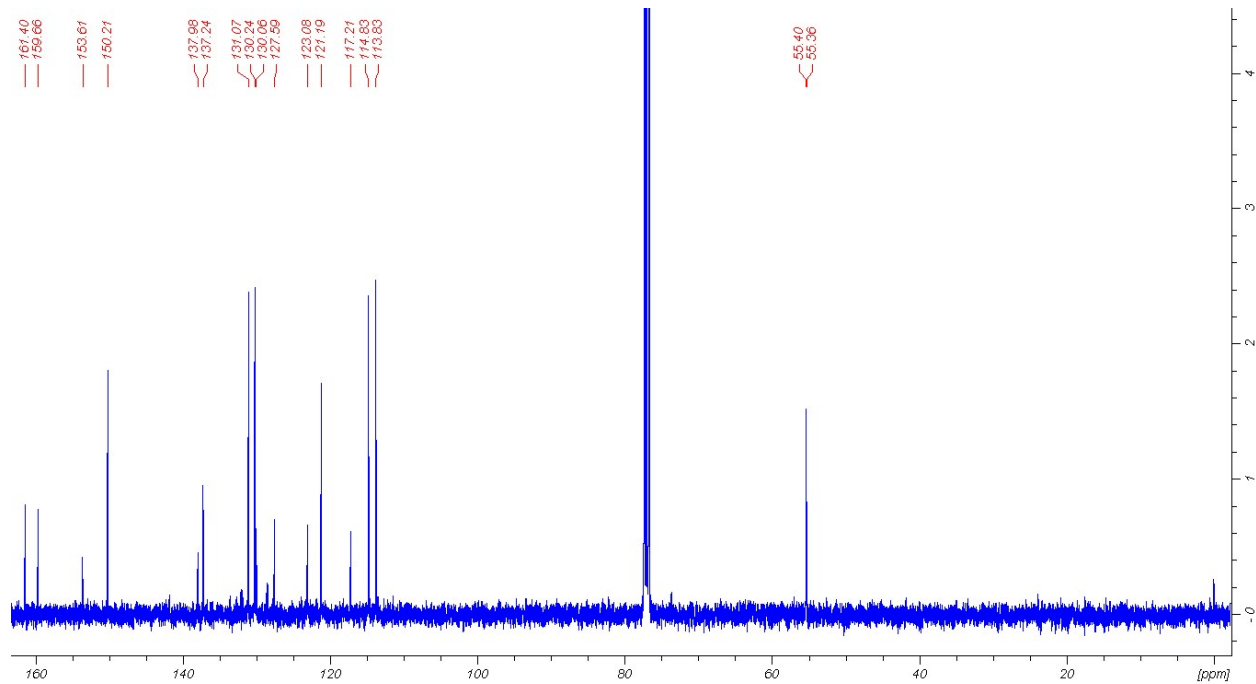

## 6f HRMS

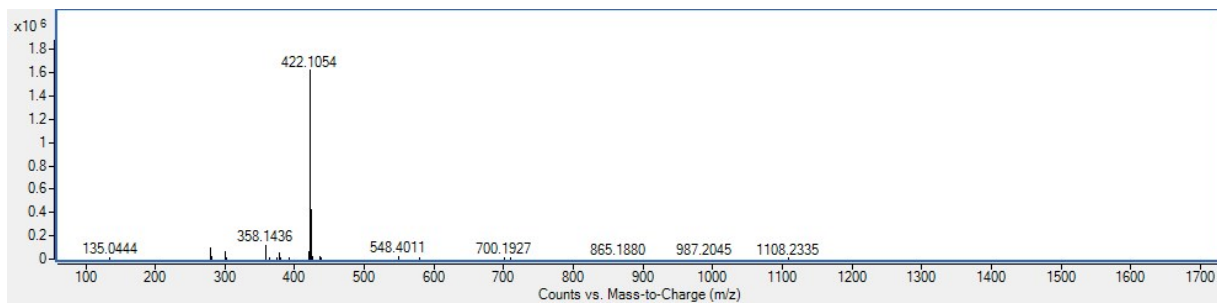

| Formula                                                         | Observed m/z | Proposed adduct | Charge | Observed neutral mass | Theoretical neutral mass | Mass error (ppm) |
|-----------------------------------------------------------------|--------------|-----------------|--------|-----------------------|--------------------------|------------------|
| C <sub>23</sub> H <sub>19</sub> N <sub>5</sub> O <sub>5</sub> S | 422.1054     | H+              | 1+     | 421.0983              | 421.0984                 | 0.24             |
|                                                                 |              |                 |        |                       |                          |                  |
|                                                                 |              |                 |        |                       |                          |                  |

### 3-Bromo-3,6-diphenyl-1,2-oxathiane 2,2-dioxide <sup>1</sup>H-NMR

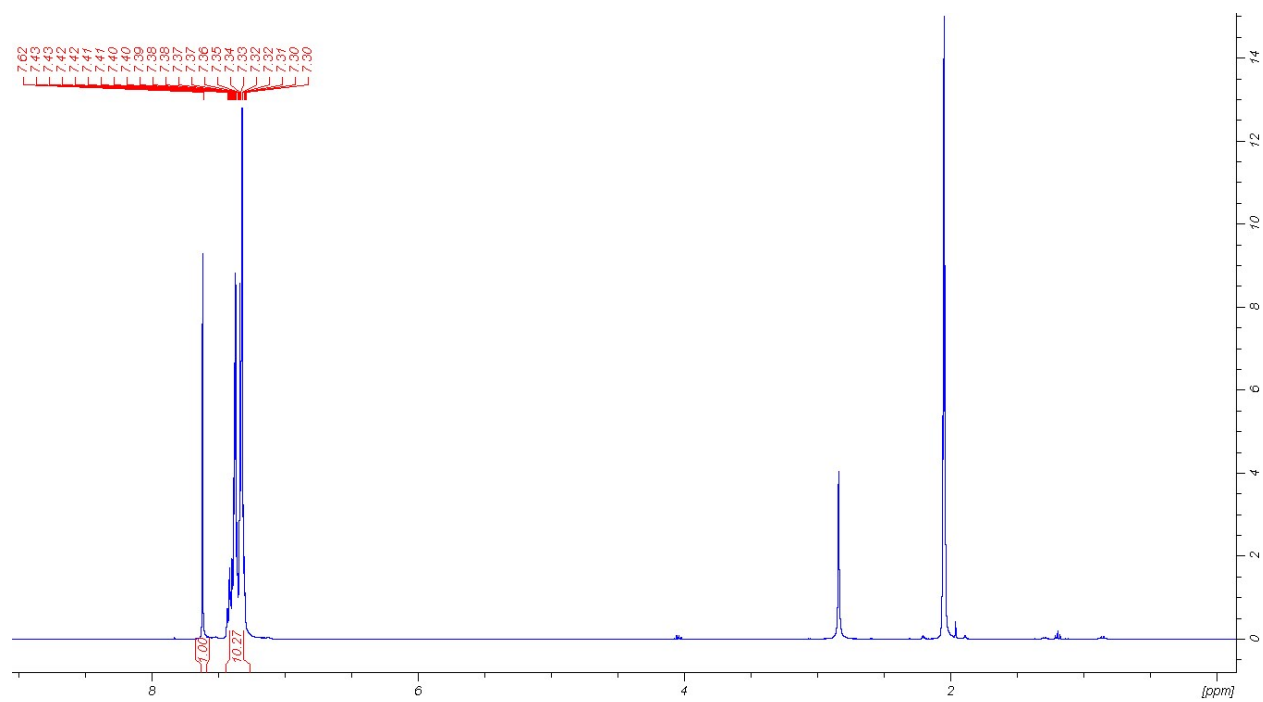

### 7 <sup>13</sup>C-NMR

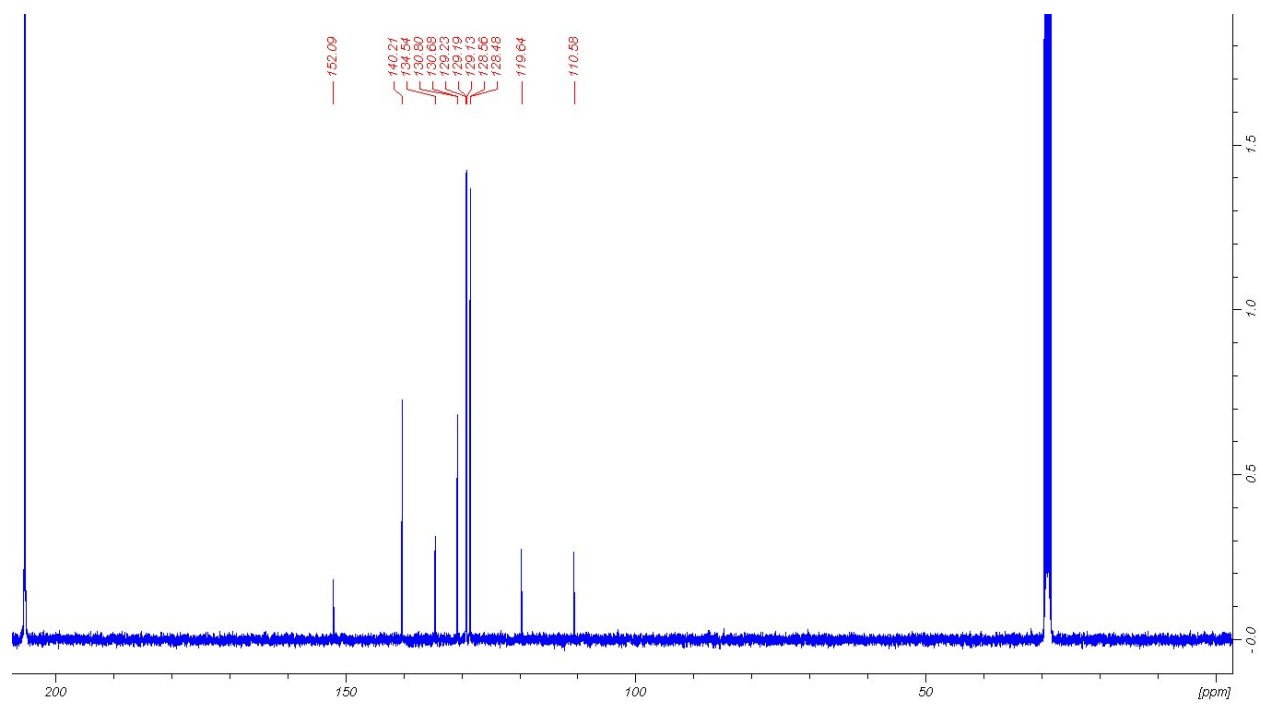



# 7 HRMS

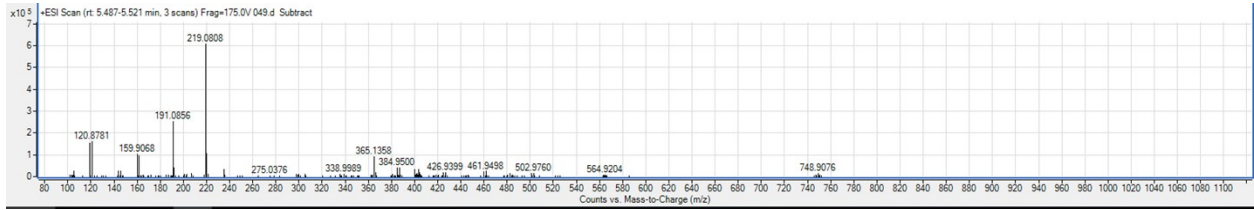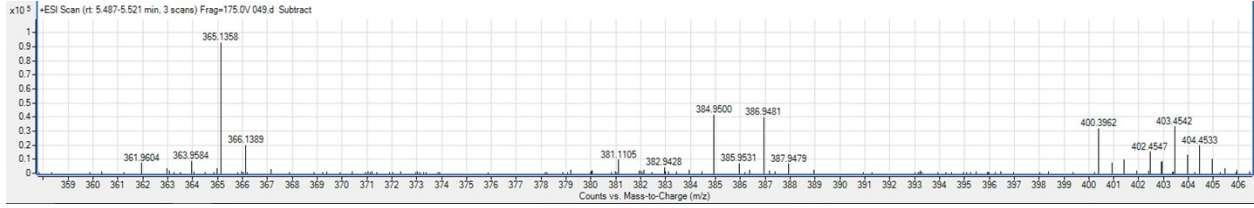

|   | Species             | Calc m/z |
|---|---------------------|----------|
| ▶ | (M+H) <sup>+</sup>  | 362.9685 |
|   | (M+Na) <sup>+</sup> | 384.9504 |

### 3-Bromo-6-phenyl-1,2-oxathiine 2,2-dioxide <sup>1</sup>H-NMR

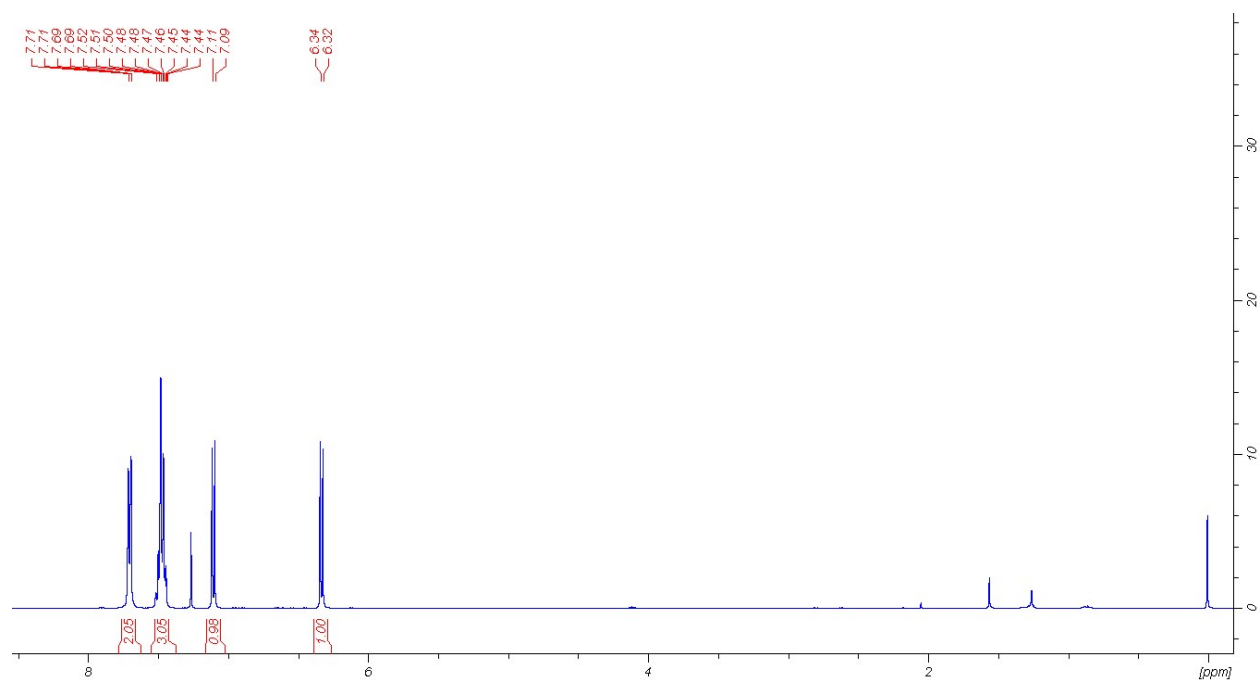

### 8 <sup>13</sup>C-NMR

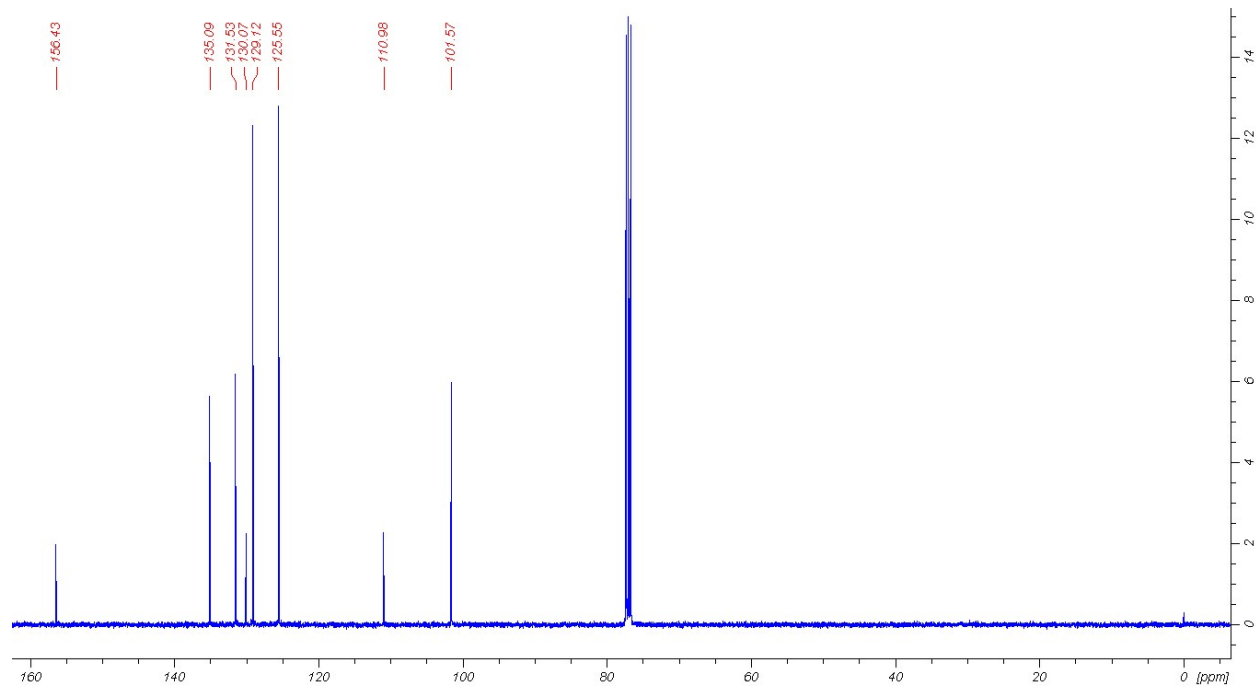

## 8 HRMS

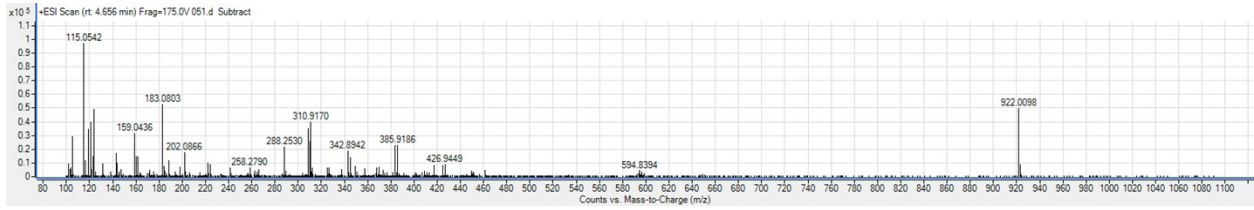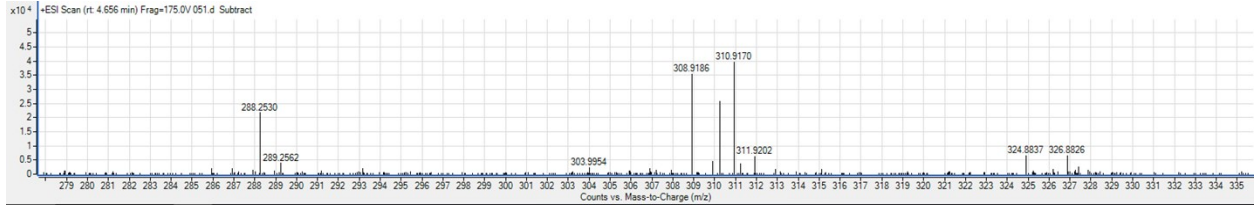

|   | Species             | Calc m/z |
|---|---------------------|----------|
| ▶ | (M+H) <sup>+</sup>  | 286.9372 |
|   | (M+Na) <sup>+</sup> | 308.9191 |

### 6,6'-Diphenyl-[3,3'-bi(1,2-oxathiine)] 2,2,2',2'-tetraoxide 9 <sup>1</sup>H-NMR

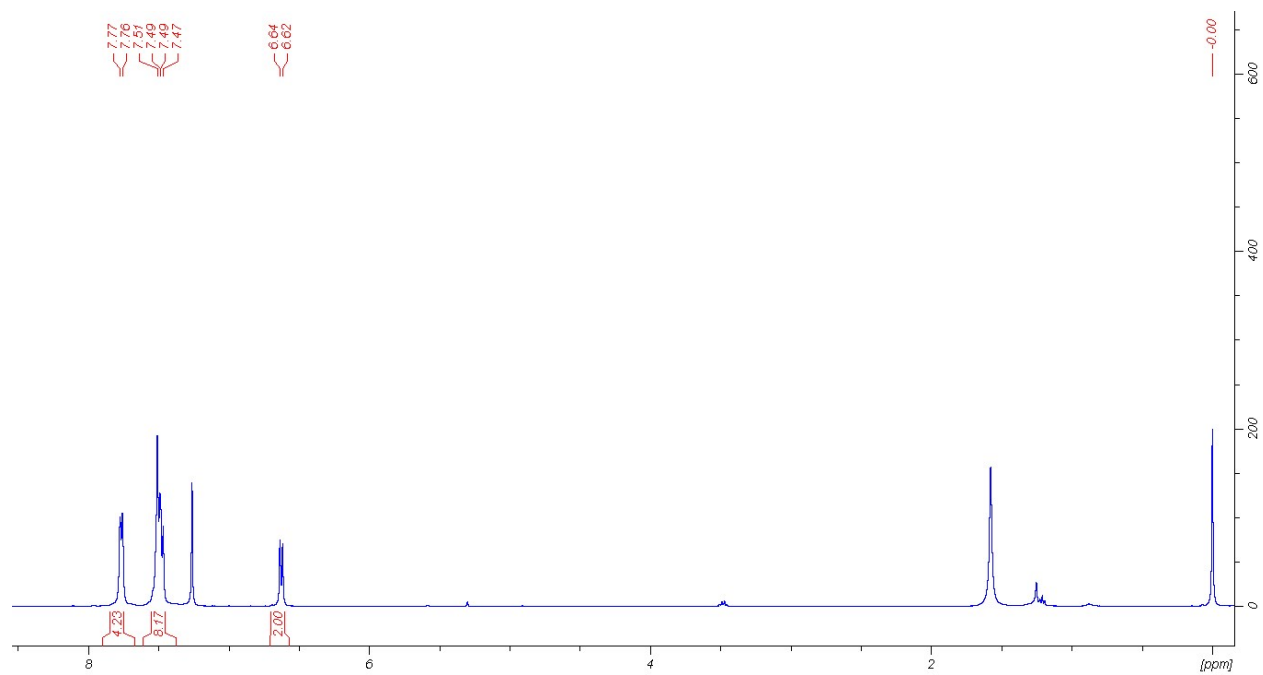

### 9 <sup>13</sup>C-NMR

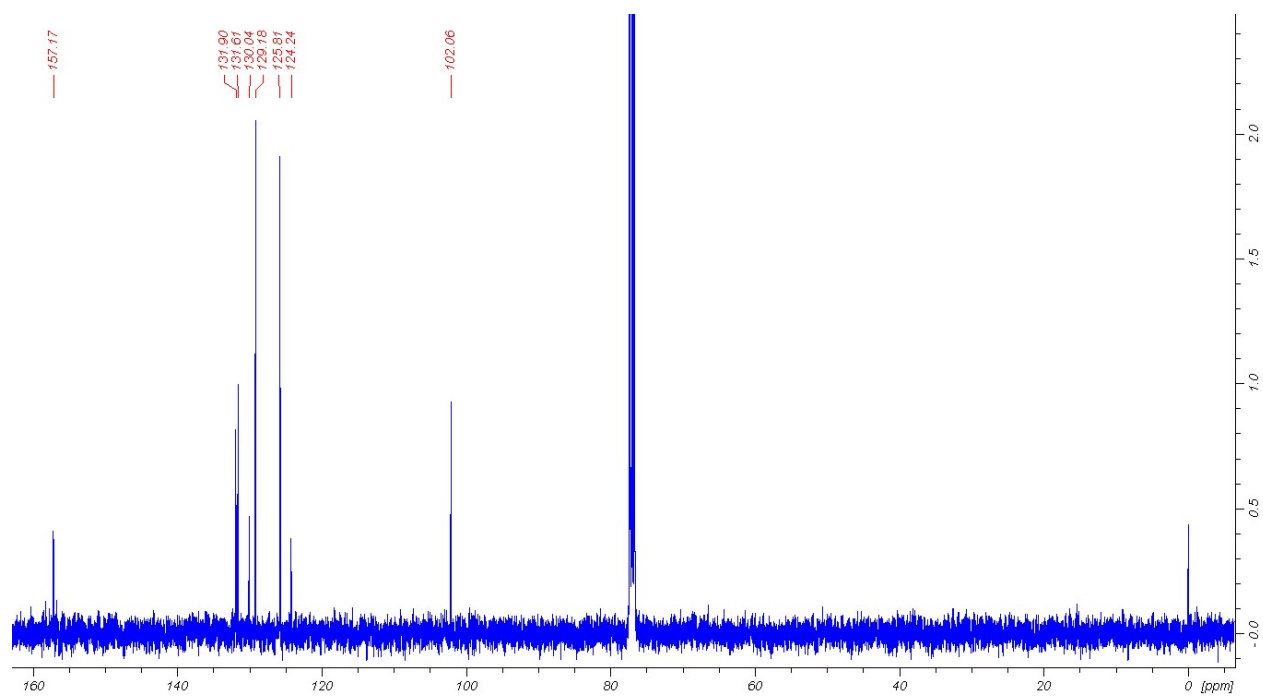

## 9 HRMS

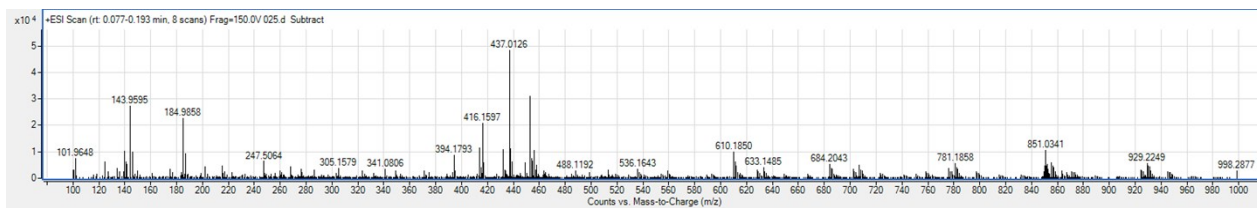

| Formula                                                       | Observed m/z | Proposed adduct | Charge         | Observed neutral mass | Theoretical neutral mass | Mass error (ppm) |
|---------------------------------------------------------------|--------------|-----------------|----------------|-----------------------|--------------------------|------------------|
| C <sub>20</sub> H <sub>14</sub> O <sub>6</sub> S <sub>2</sub> | 437.0126     | Na <sup>+</sup> | 1 <sup>+</sup> | 414.0231              | 414.0232                 | 0.09             |
|                                                               |              |                 |                |                       |                          |                  |
|                                                               |              |                 |                |                       |                          |                  |

5,5',6,6'-Tetraphenyl-[3,3'-bi(1,2-oxathiine)] 2,2',2',2'-tetraoxide <sup>1</sup>H-NMR

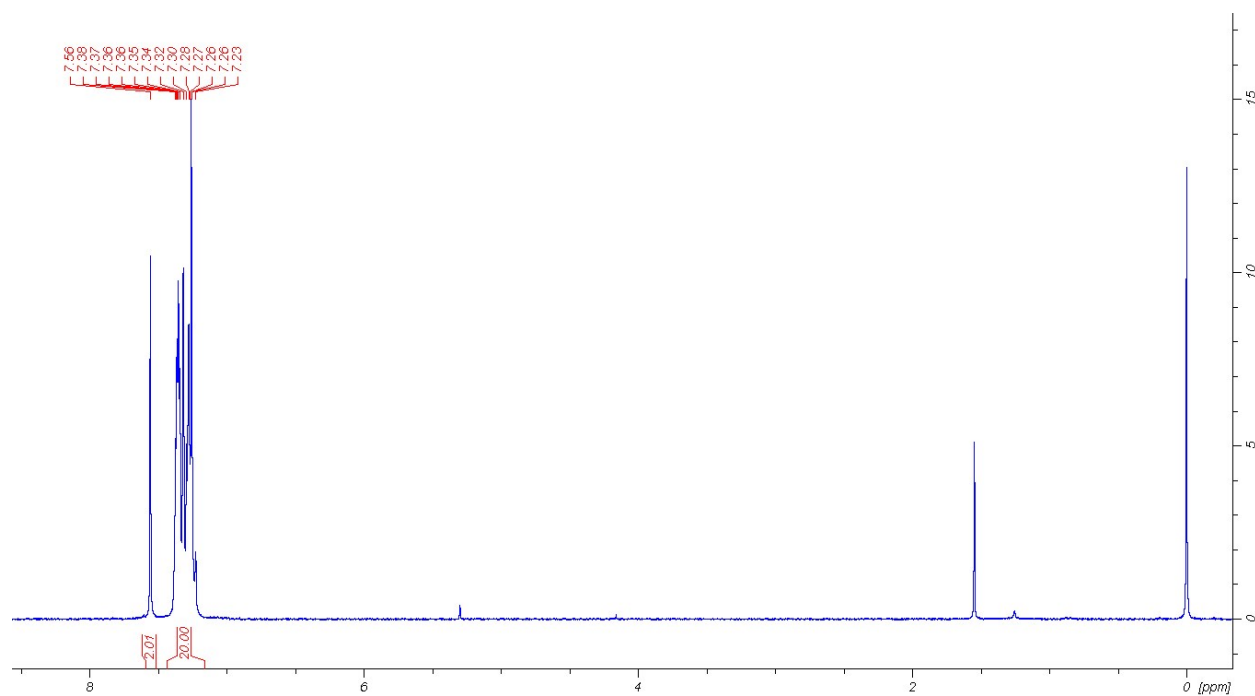

<sup>13</sup>C-NMR

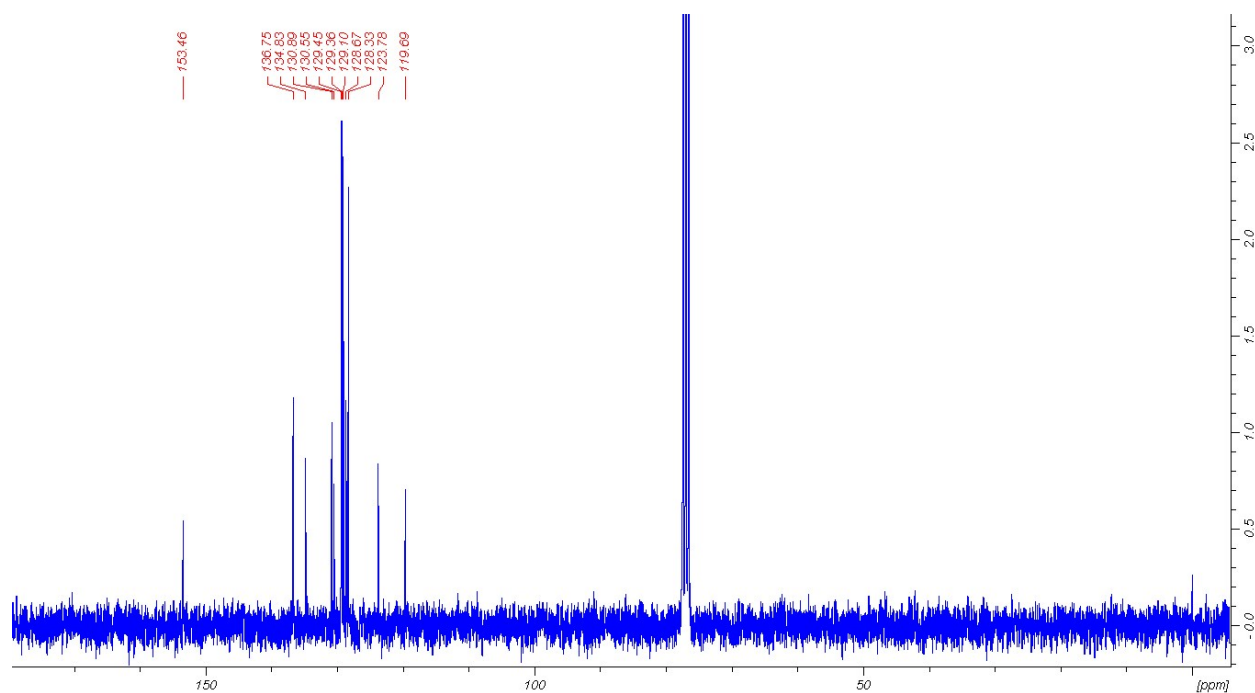

# 10 HRMS

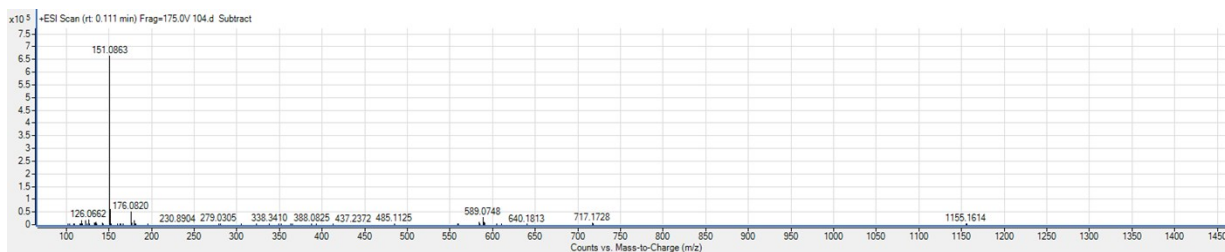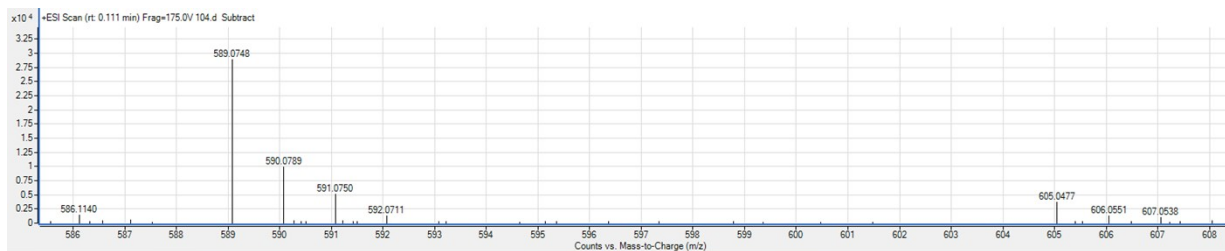

| Formula    | Observed m/z | Proposed adduct | Charge | Observed neutral mass | Theoretical neutral mass | Mass error (ppm) |
|------------|--------------|-----------------|--------|-----------------------|--------------------------|------------------|
| C32H22O6S2 | 589.0749     | Na+             | 1+     | 566.0856              | 566.0858                 | 0.25             |
|            | 605.0489     | K+              | 1+     | 566.0861              |                          | 0.61             |
|            |              |                 |        |                       |                          |                  |

**2,5,9-Triphenyl-5,10a-dihydro-1H-[1,2]oxathiino[5,6-c][1,2,4] triazolo[1,2-a]pyridazine-1,3(2H)-dione  
8,8-dioxide 11a (crude intermediate) <sup>1</sup>H-NMR**

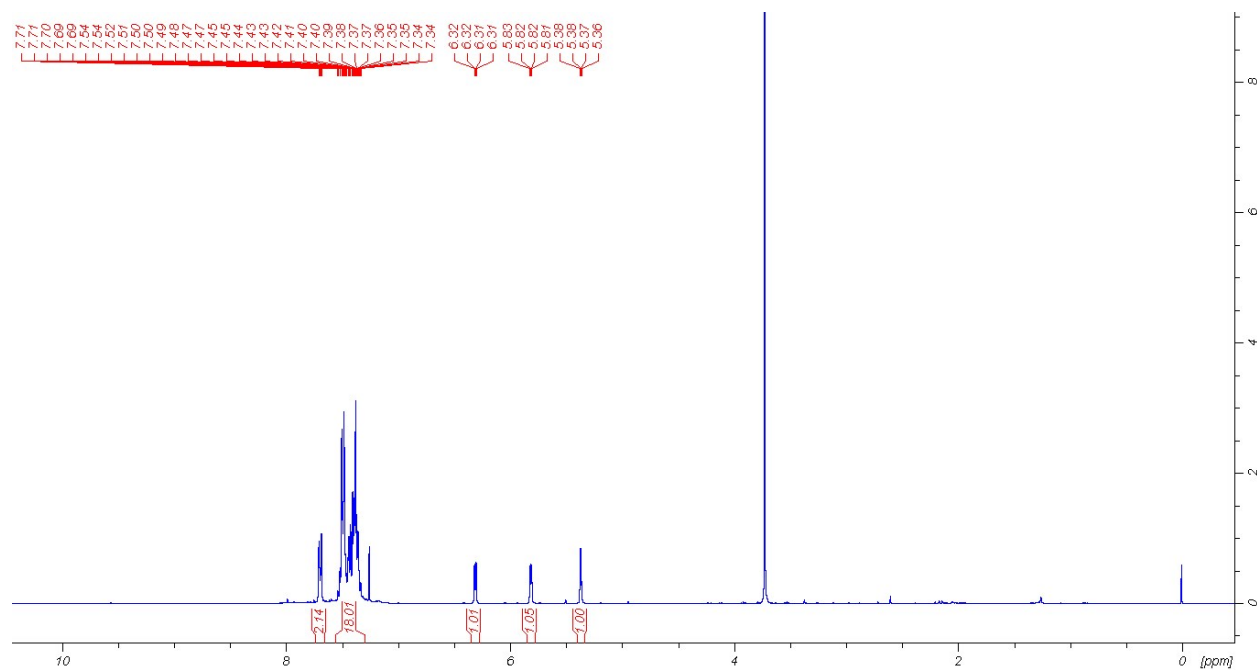



**5-(4-Methoxyphenyl)-2,9-diphenyl-5,10a-dihydro-1H-[1,2]oxathiino[5,6-c][1,2,4] triazolo[1,2-a]pyridazine-1,3(2H)-dione 8,8-dioxide 11b (crude intermediate) <sup>1</sup>H-NMR**

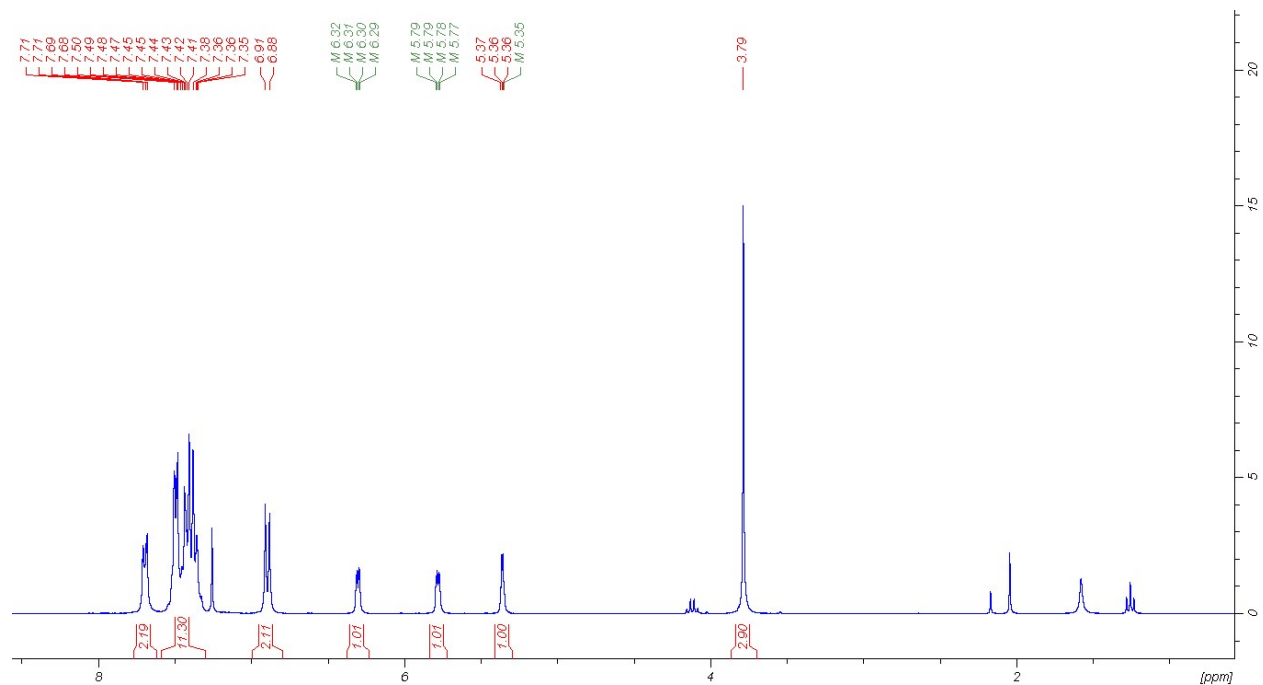

**11b (intermediate) <sup>13</sup>C-NMR**

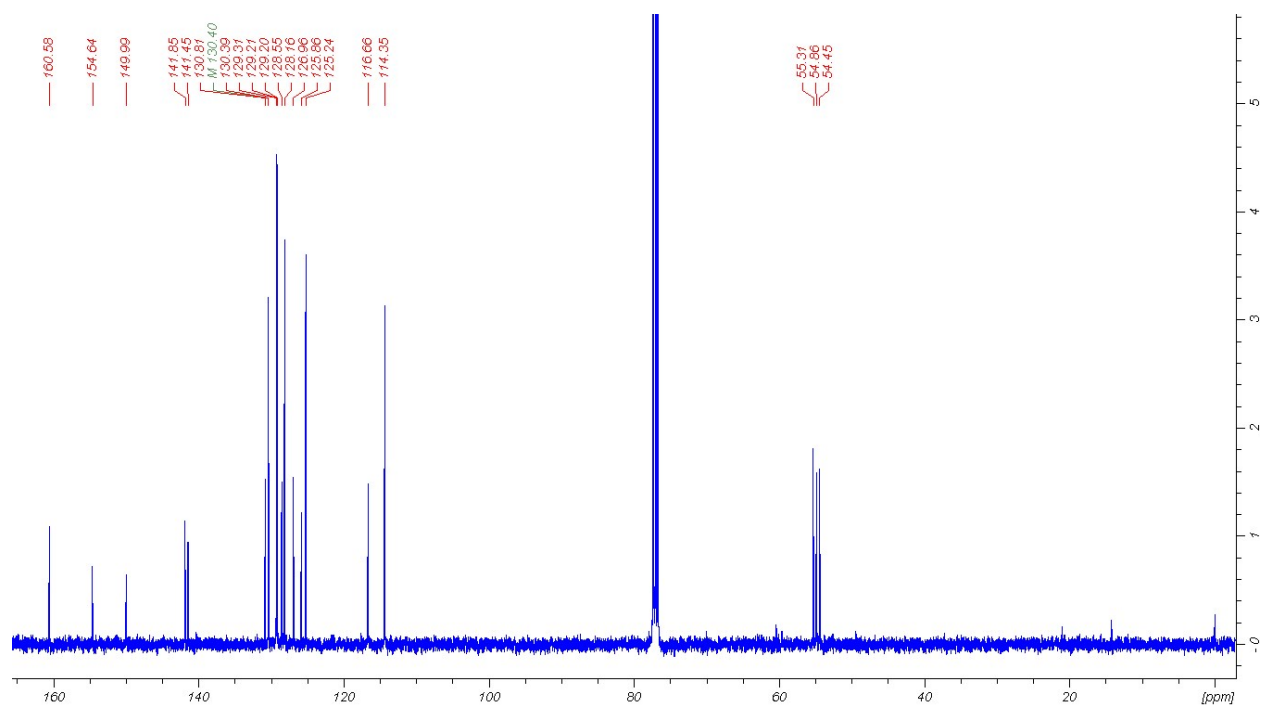

### 11b COSY-NMR

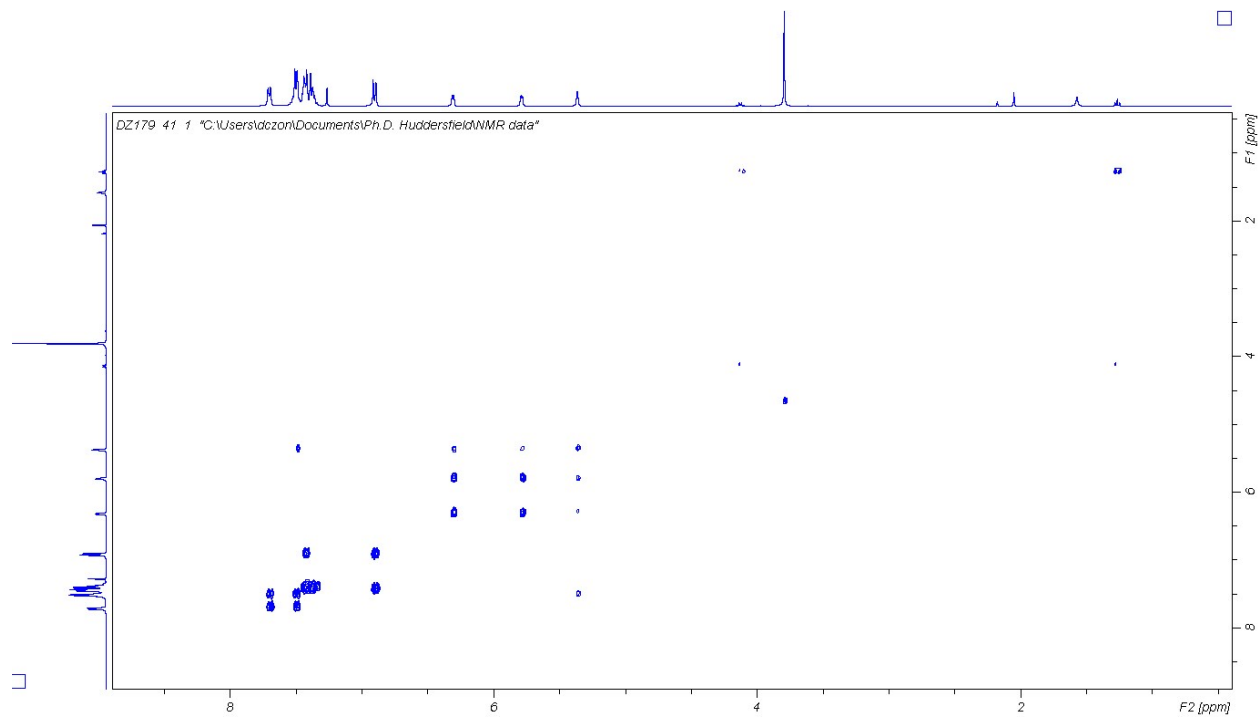

### 11b NOESY-NMR

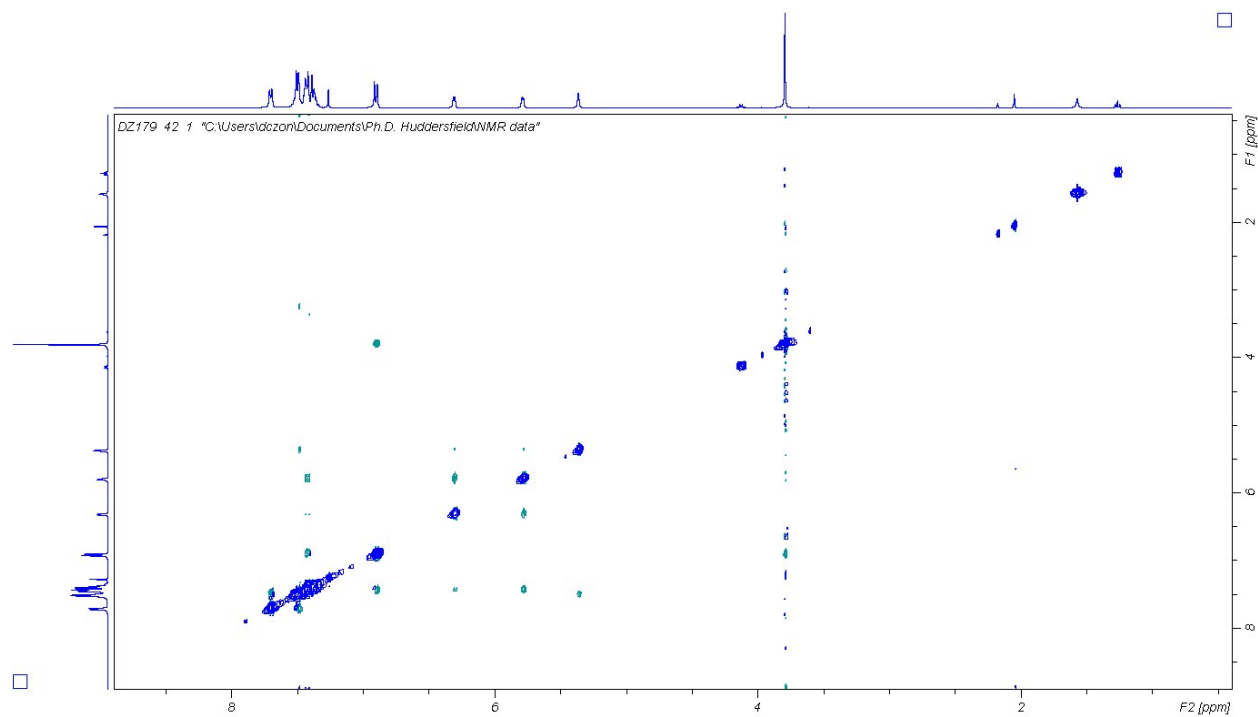

## 11b HSQC-NMR

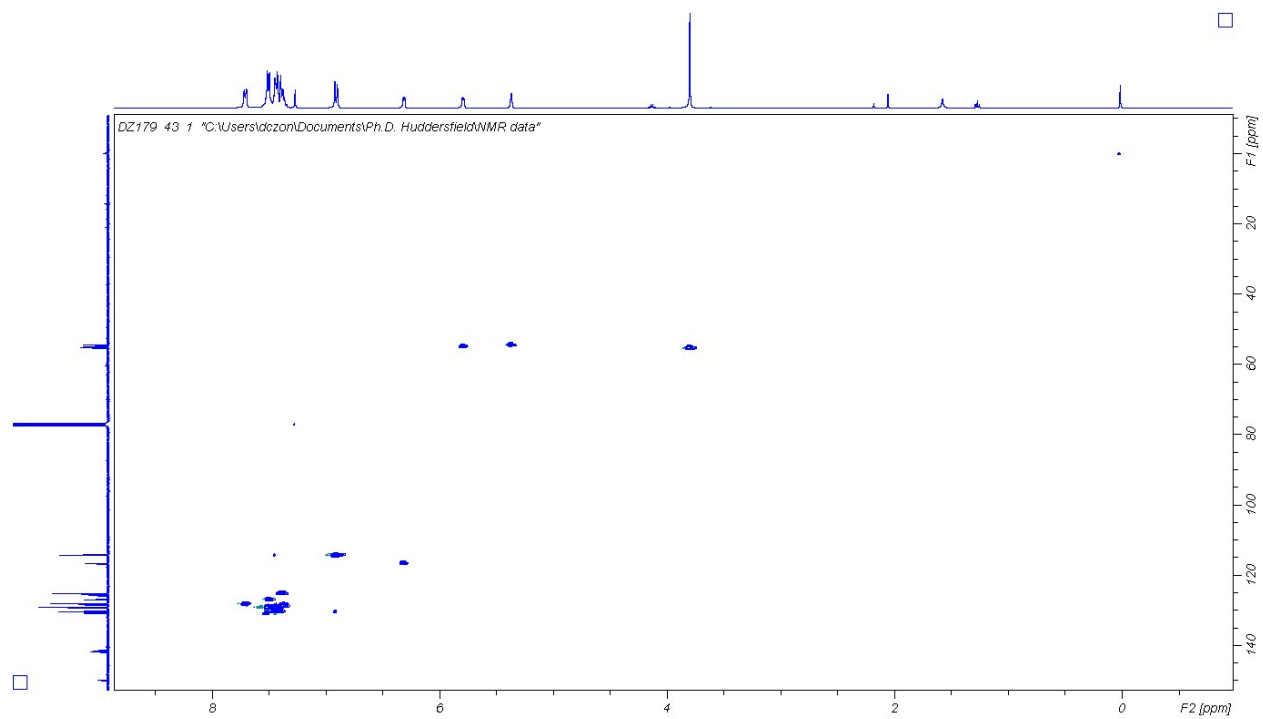

## 11b HMBC-NMR

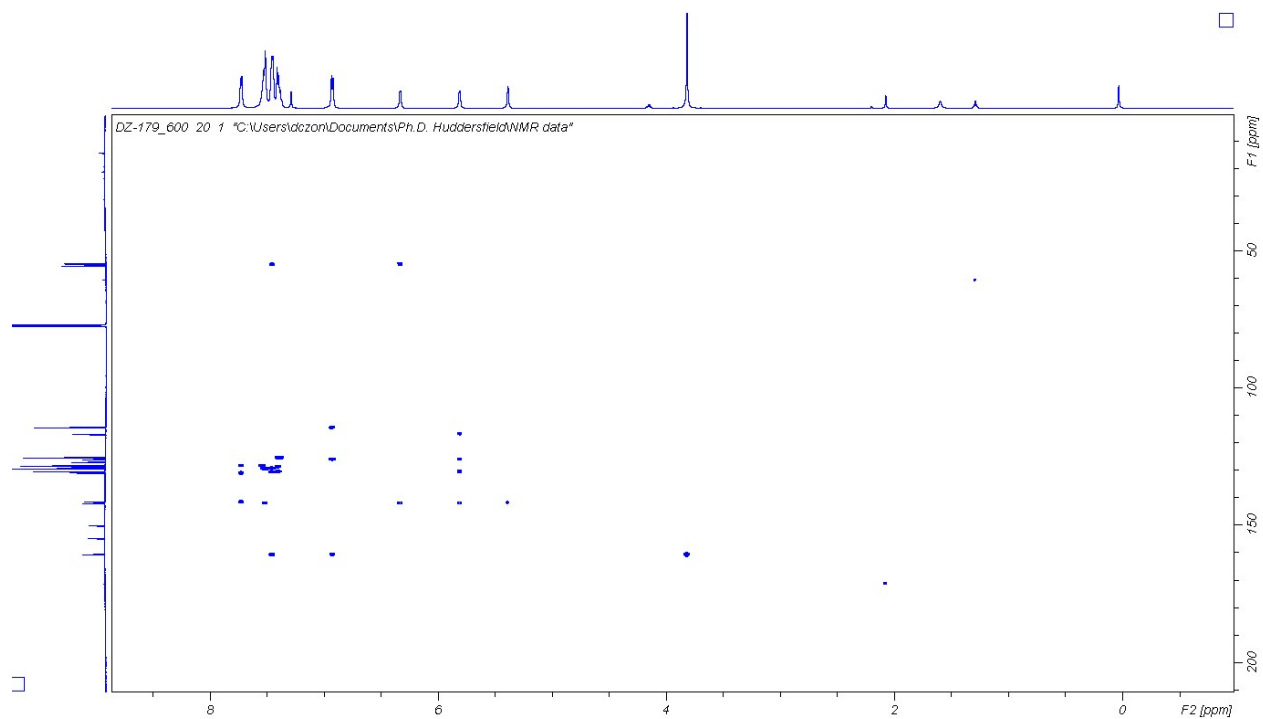

## 11b HRMS

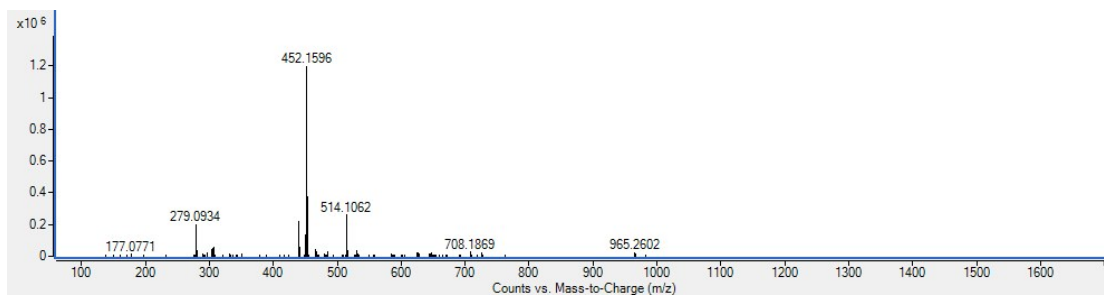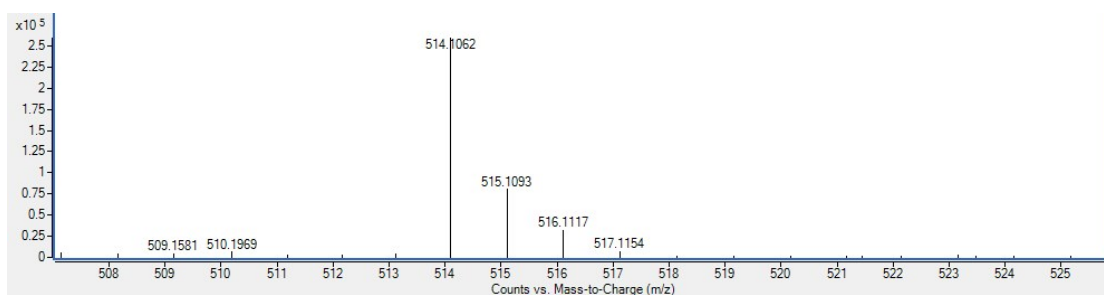

| Base formula (M)                         | Species | Calc m/z | Mono m/z |
|------------------------------------------|---------|----------|----------|
| <input type="text" value="C27H19N3O6S"/> | M+      | 513.0989 | 513.0989 |
|                                          | M       | 513.0995 | 513.0995 |
|                                          | (M+H)+  | 514.1067 | 514.1067 |

**2,9-Diphenyl-5-(4-(trifluoromethyl)phenyl)-5,10a-dihydro-1H-[1,2]oxathiino [5,6-c][1,2,4]triazolo [1,2-a]pyridazine-1,3(2H)-dione 8,8-dioxide 11c (crude intermediate) <sup>1</sup>H-NMR**

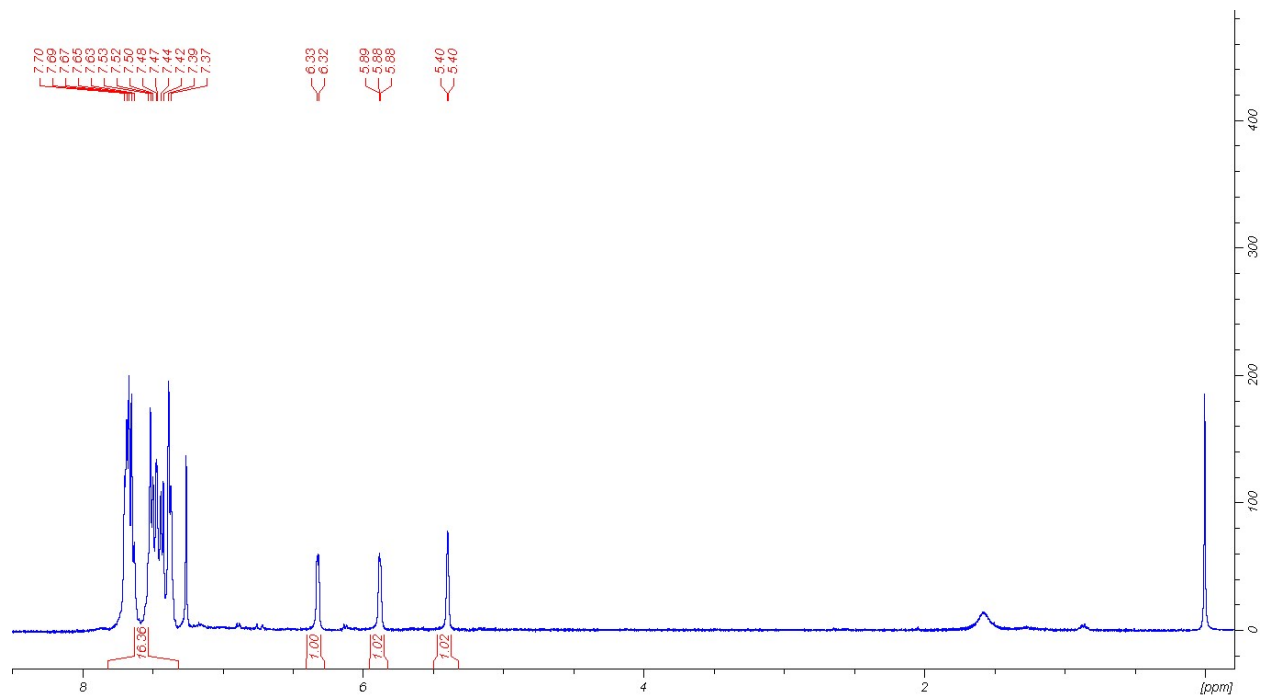

**11c <sup>13</sup>C-NMR (intermediate)**

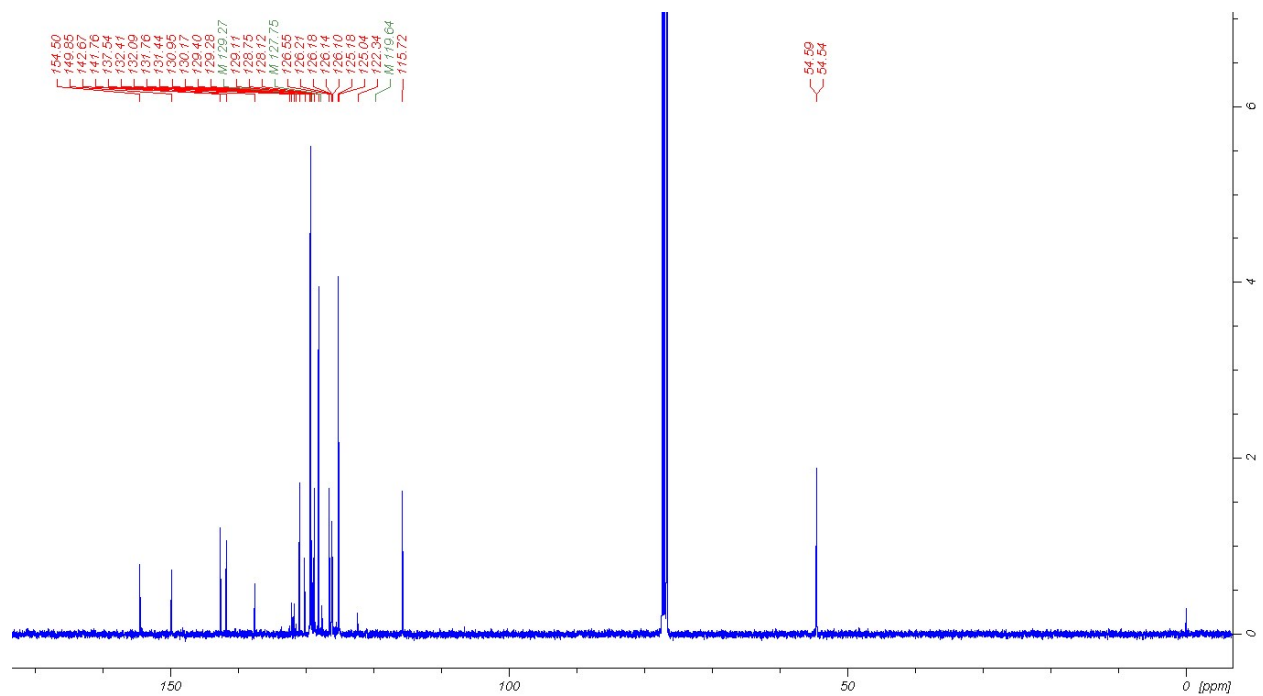

### 11c <sup>19</sup>F-NMR

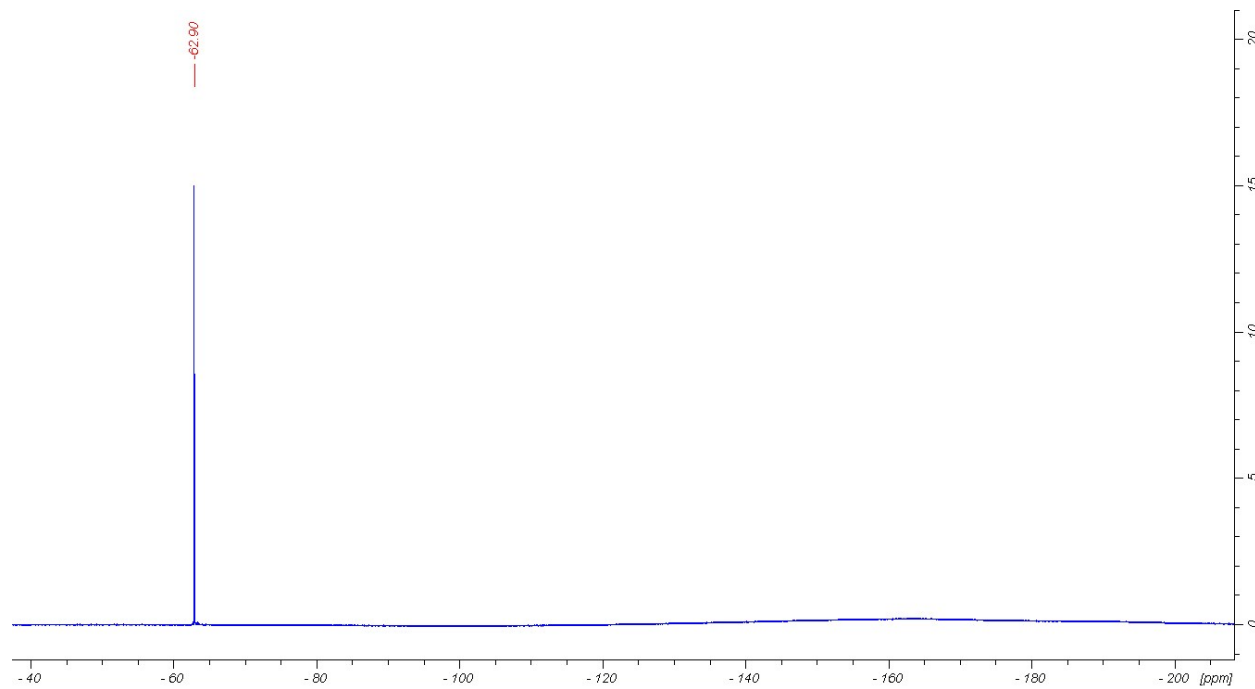

### 11c COSY-NMR

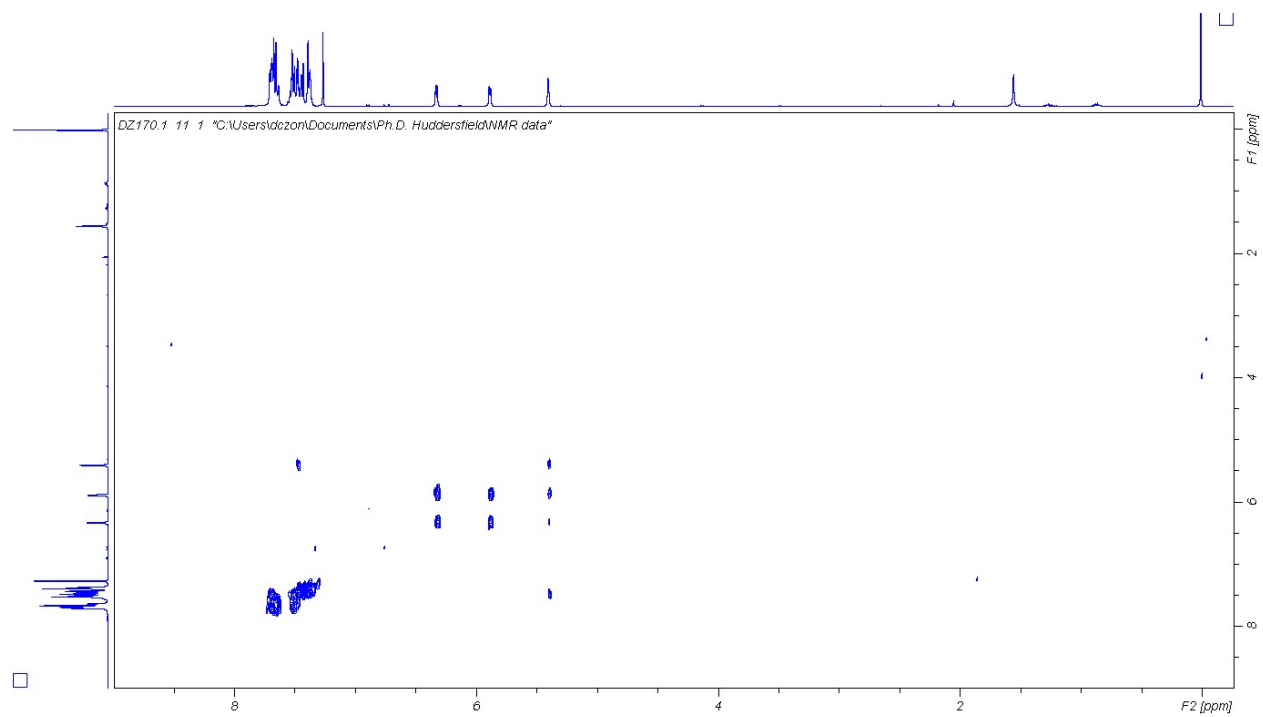

# 11c NOESY-NMR

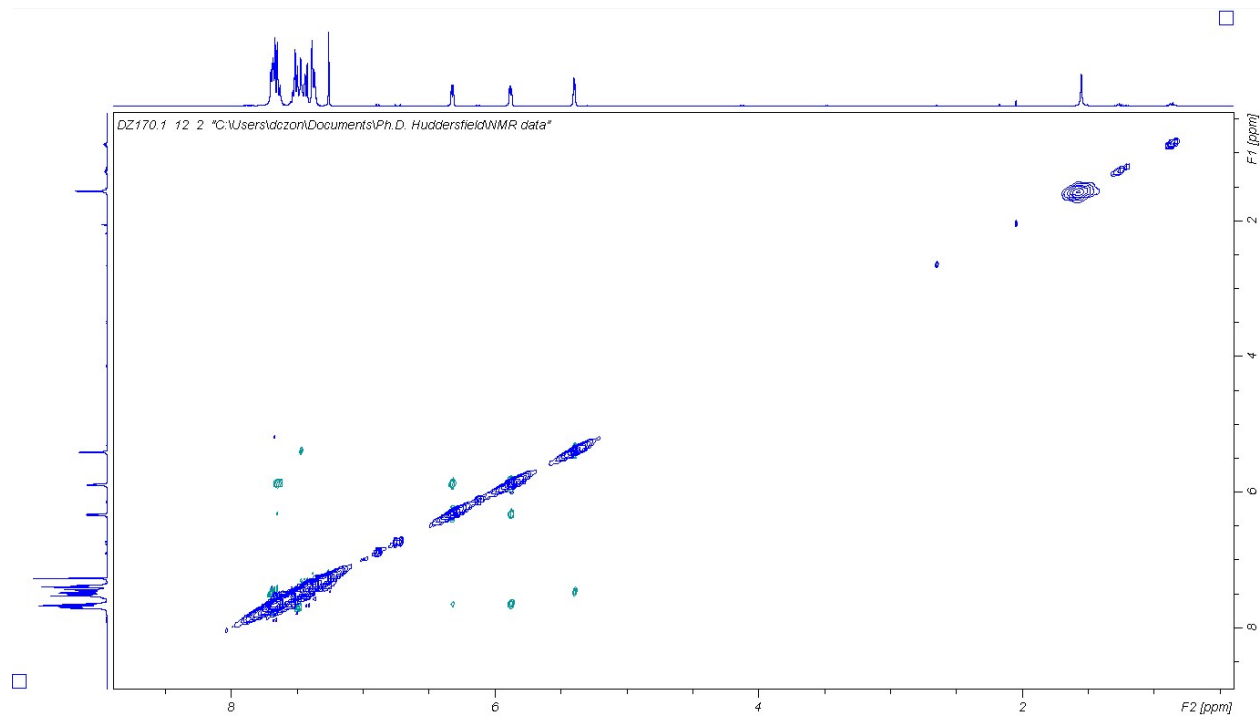

### 11c HSQC-NMR

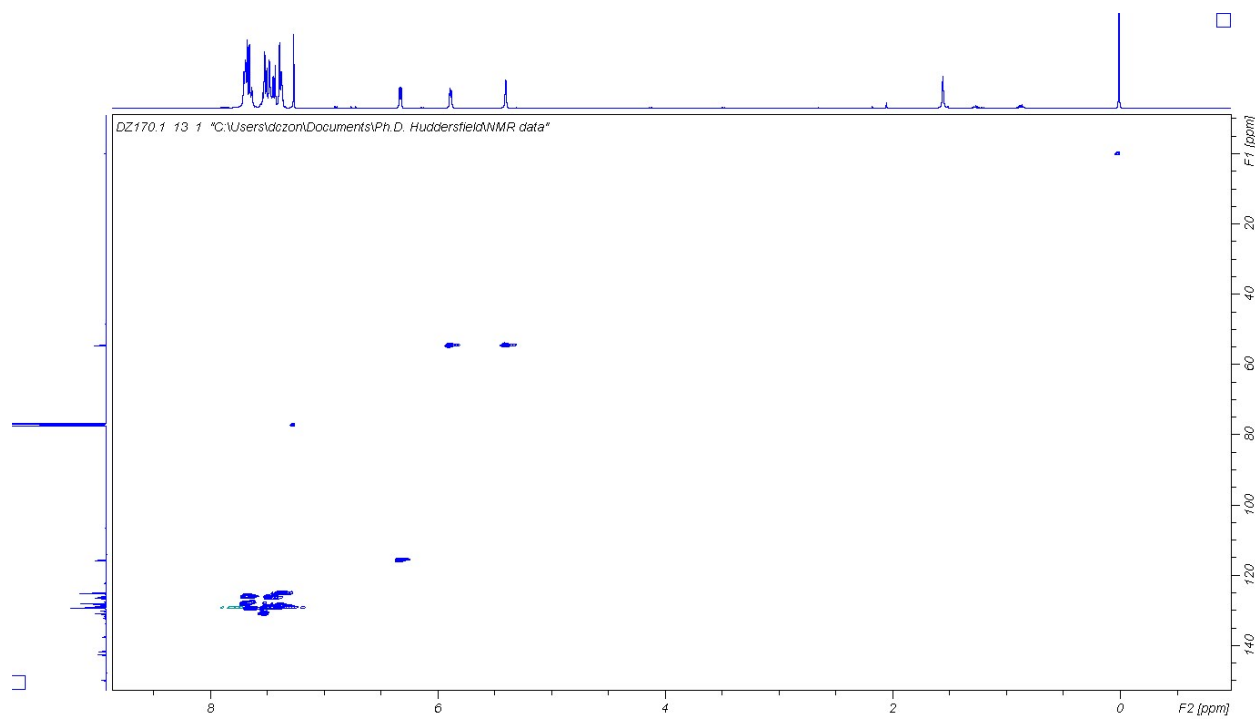

### 11c HMBC-NMR

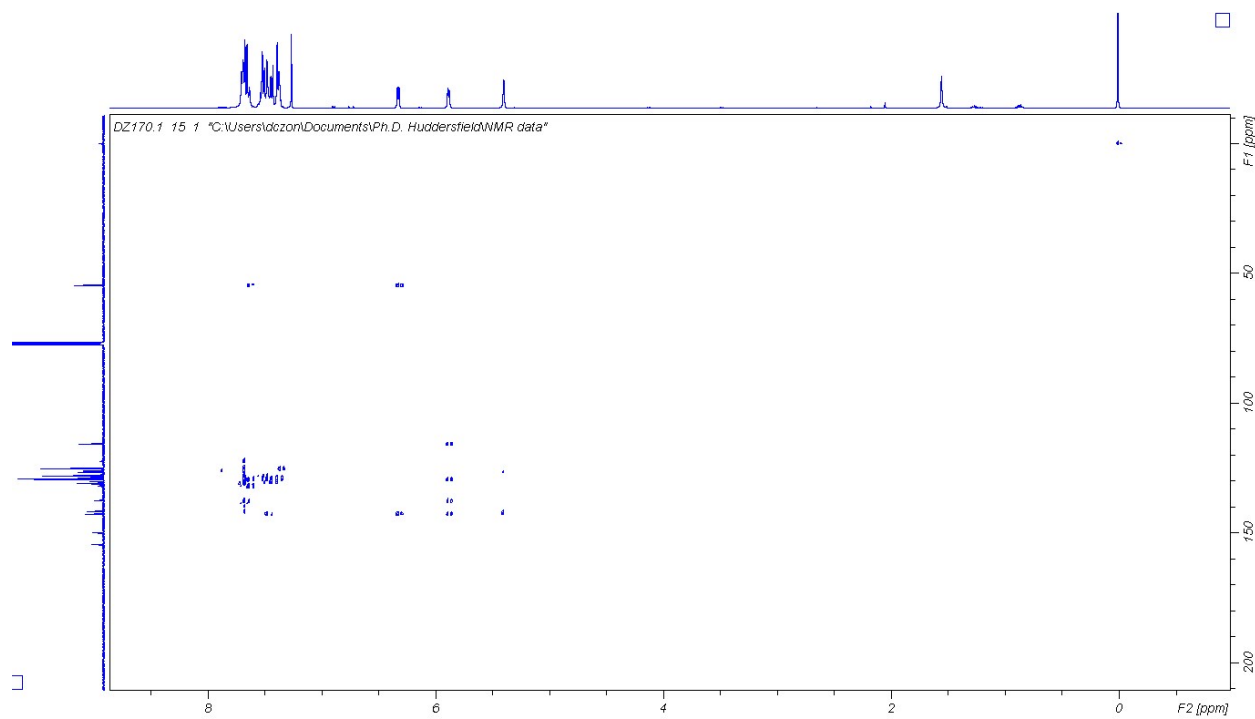



# 11c HRMS

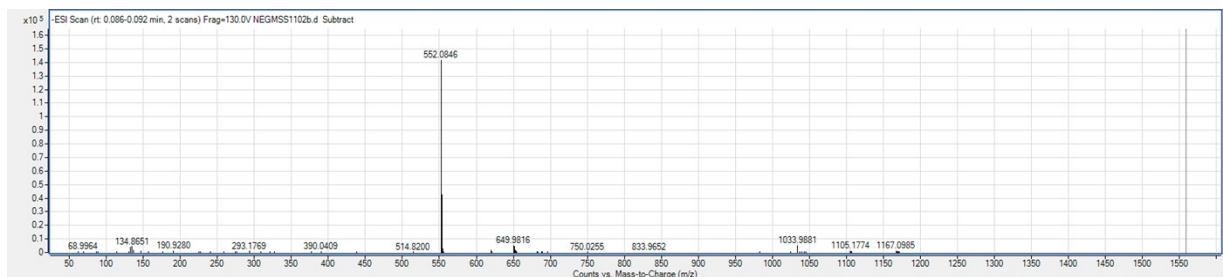

| Formula                  | Observed m/z | Proposed adduct | Charge | Observed neutral mass | Theoretical neutral mass | Mass error (ppm) |
|--------------------------|--------------|-----------------|--------|-----------------------|--------------------------|------------------|
| $C_{27}H_{18}F_3N_3O_5S$ | 552.0846     | (M-H)-          | 1      | 553.0918.1394         | 553.0919                 | 0.48             |
|                          |              |                 |        |                       |                          |                  |
|                          |              |                 |        |                       |                          |                  |

**2,5,9-Triphenyl-5,9-dihydro-1*H*-[1,2]oxathiino[5,6-*c*][1,2,4]triazolo[1,2-*a*]pyridazine-1,3(2*H*)-dione 8,8-dioxide 12a <sup>1</sup>H-NMR**

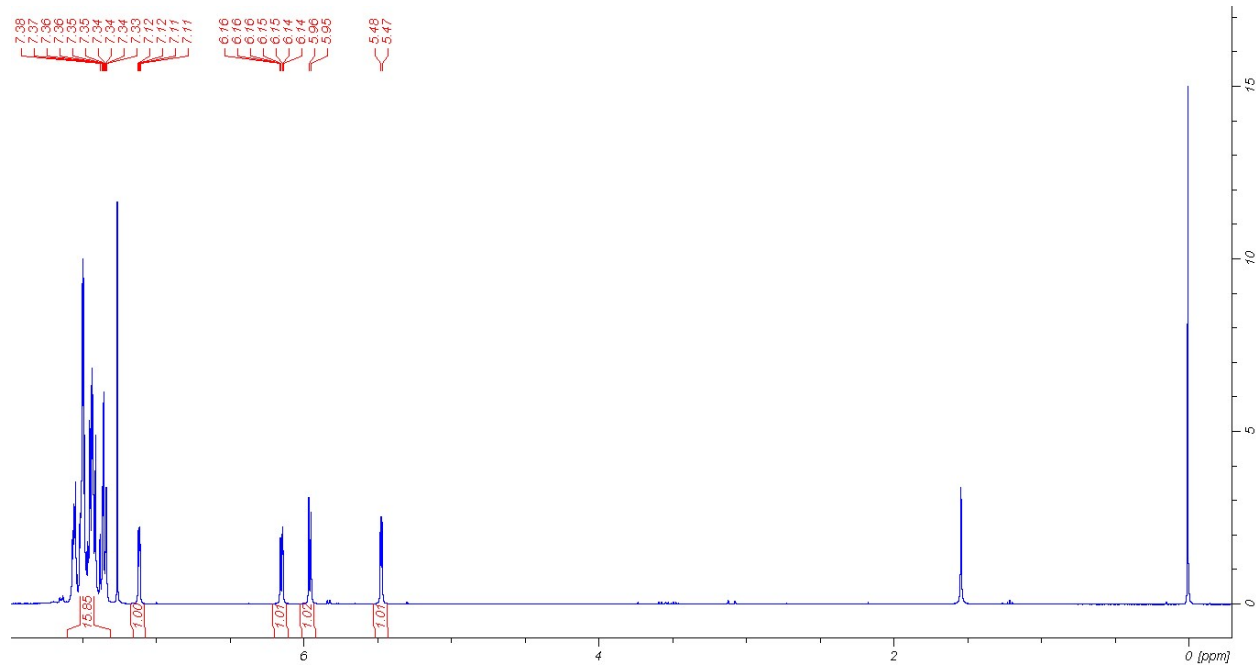

**12a <sup>1</sup>H-NMR expansion (inset showing coupling constants for protons appended to butadiene unit)**

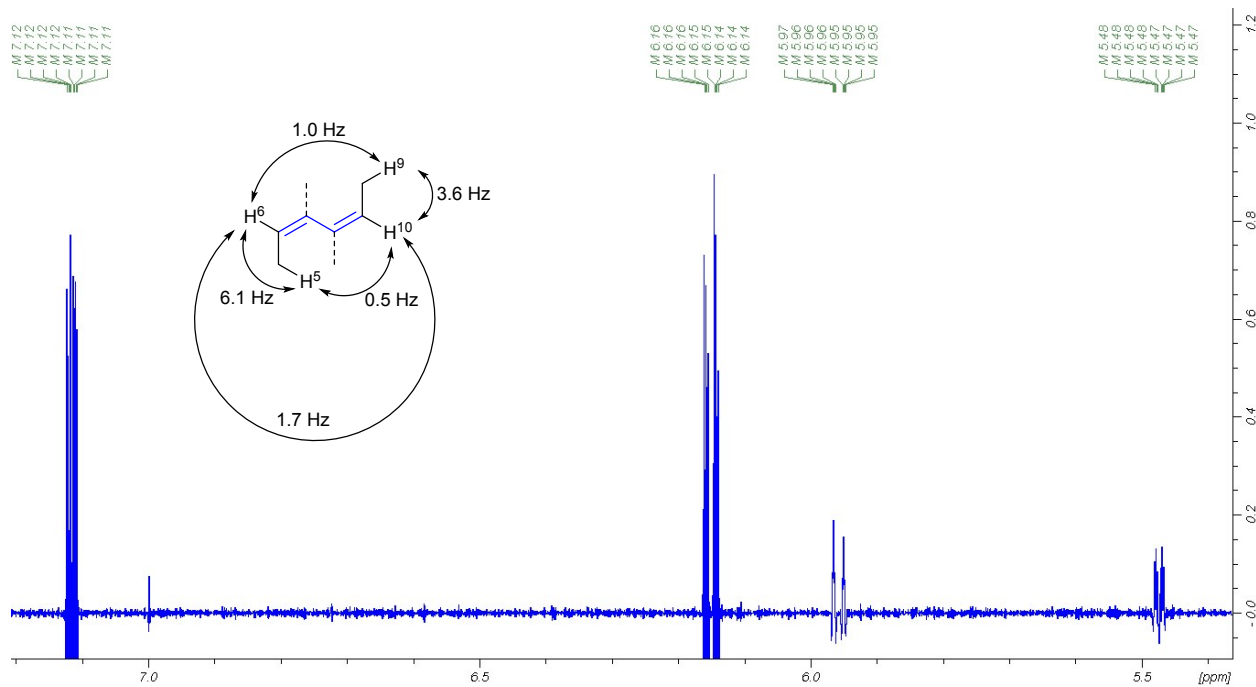

### 12a <sup>13</sup>C-NMR

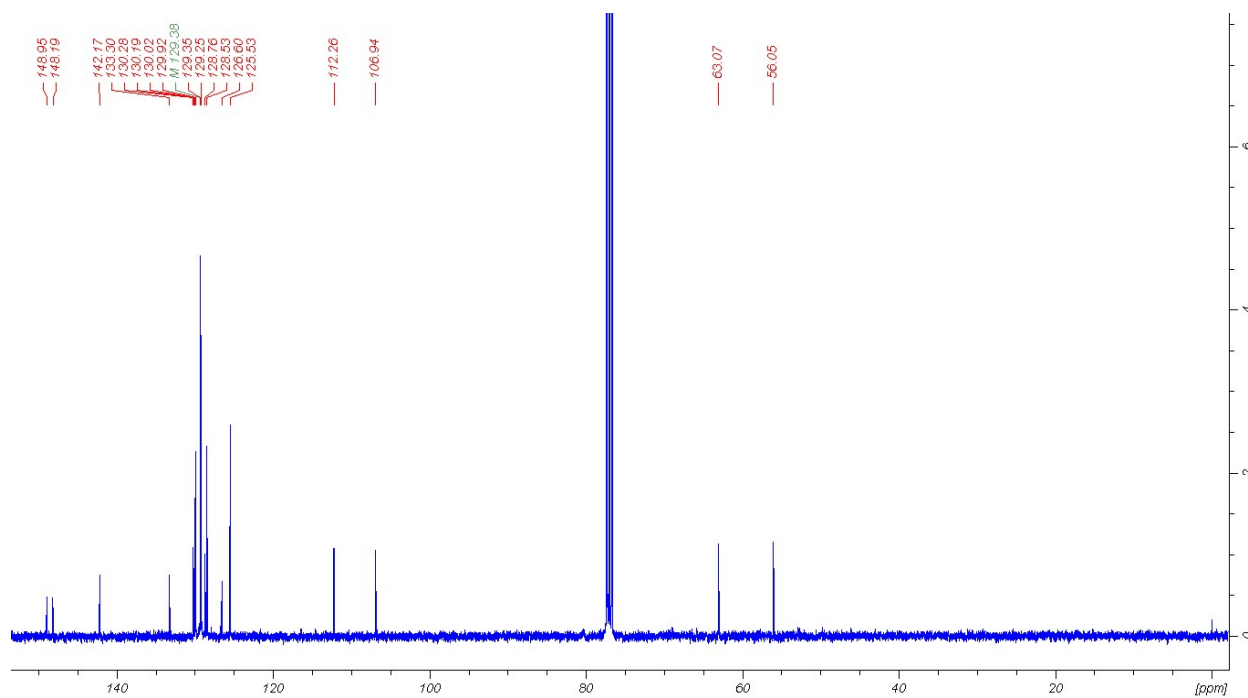

### 12a COSY-NMR

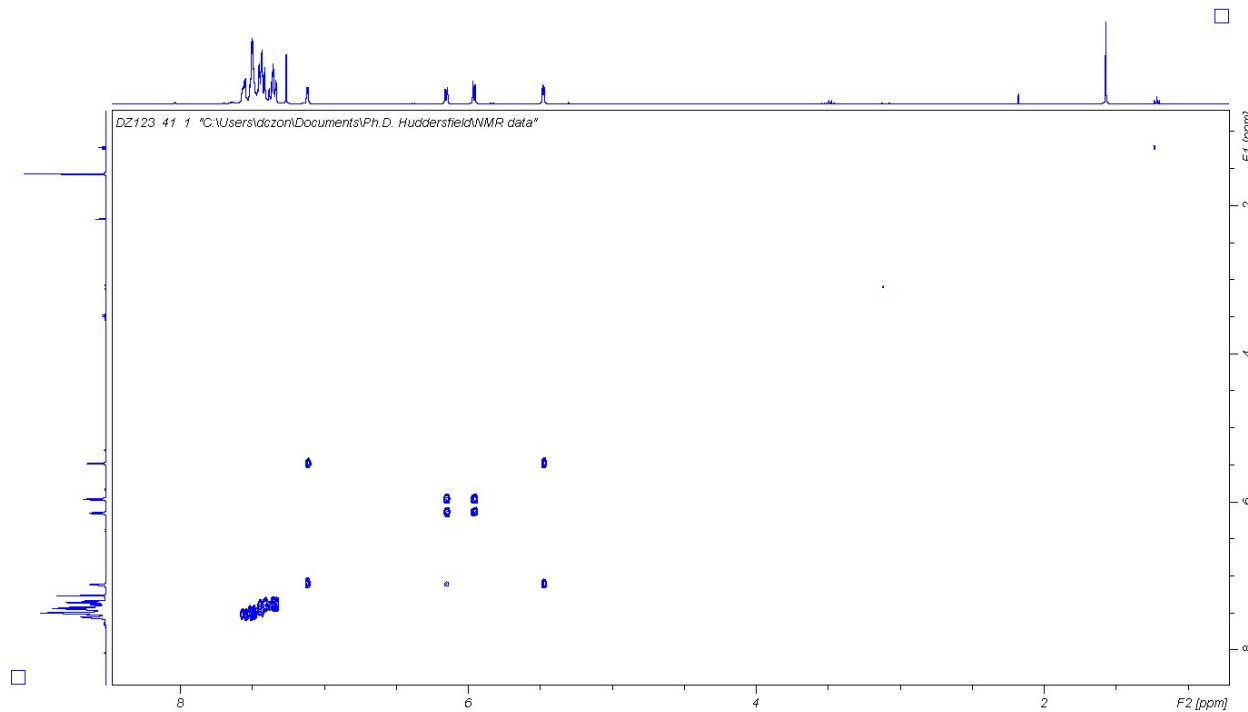

## 12a NOESY-NMR

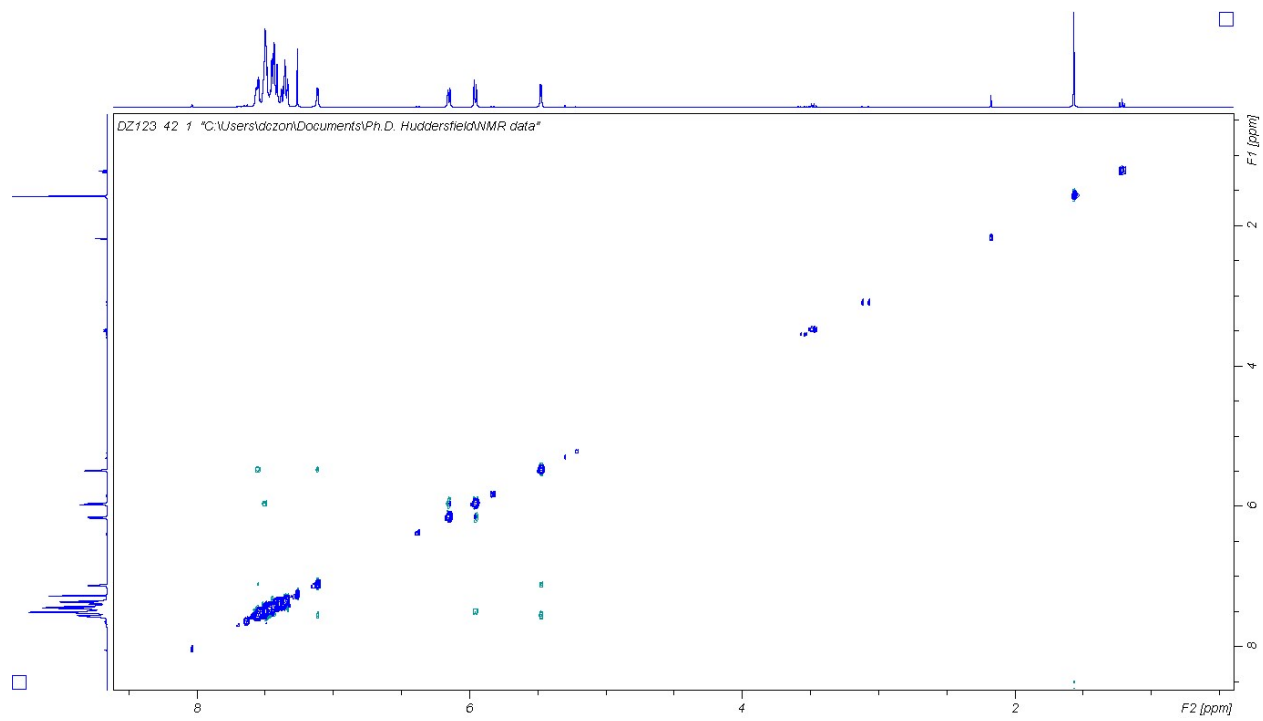

## 12a HSQC-NMR

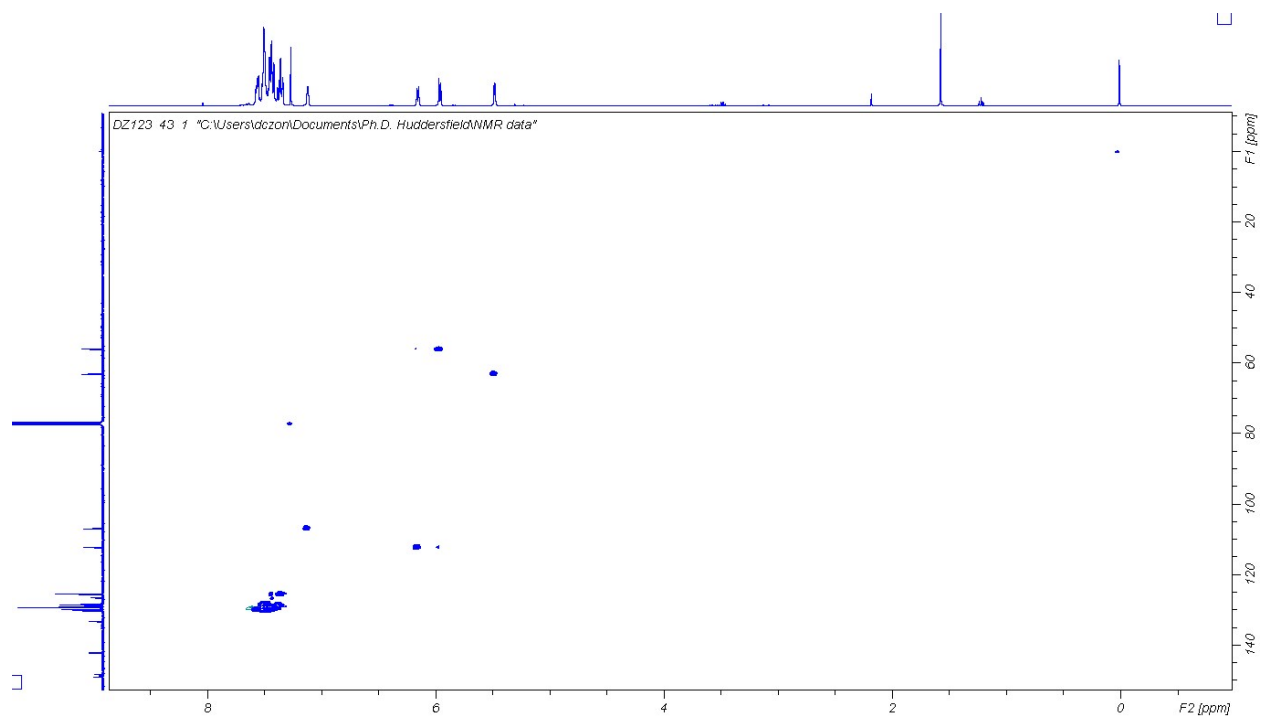

## 12a HMBC-NMR

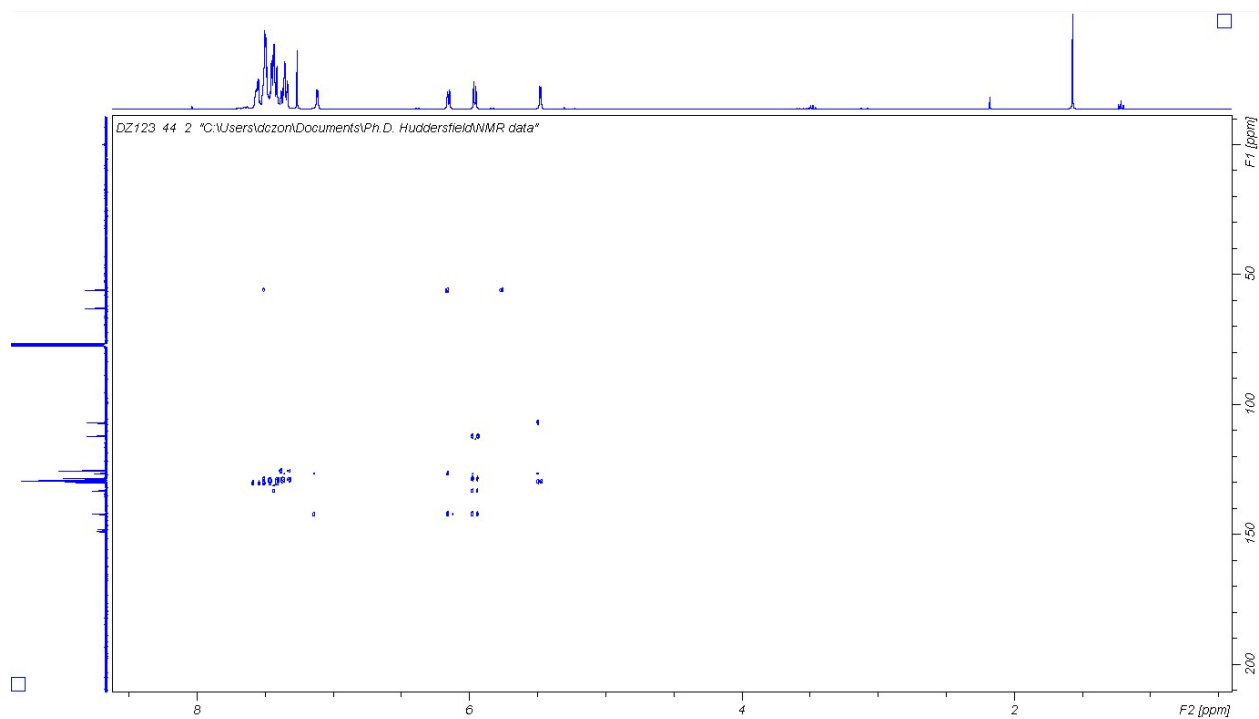

## 12a HRMS

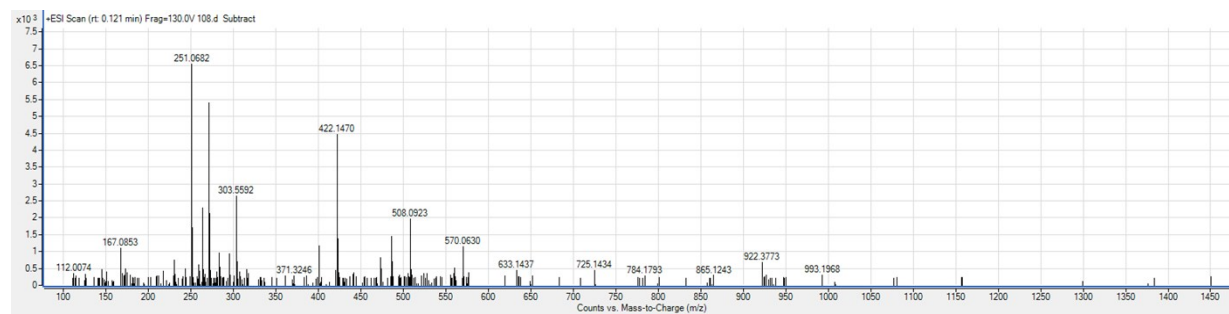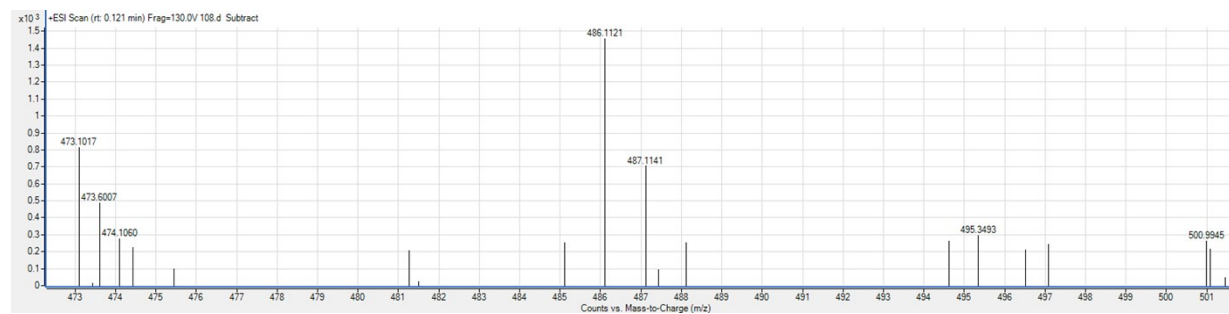

| Formula                                                         | Observed m/z | Proposed adduct | Charge         | Observed neutral mass | Theoretical neutral mass | Mass error (ppm) |
|-----------------------------------------------------------------|--------------|-----------------|----------------|-----------------------|--------------------------|------------------|
| C <sub>26</sub> H <sub>19</sub> N <sub>3</sub> O <sub>5</sub> S | 486.1121     | H <sup>+</sup>  | 1 <sup>+</sup> | 485.1048              | 485.1045                 | 0.62             |

**5-(4-Methoxyphenyl)-2,9-diphenyl-5,9-dihydro-1H-[1,2]oxathiino[5,6-c][1,2,4]triazolo[1,2-a]pyridazine-1,3(2H)-dione 8,8-dioxide 12b <sup>1</sup>H-NMR**

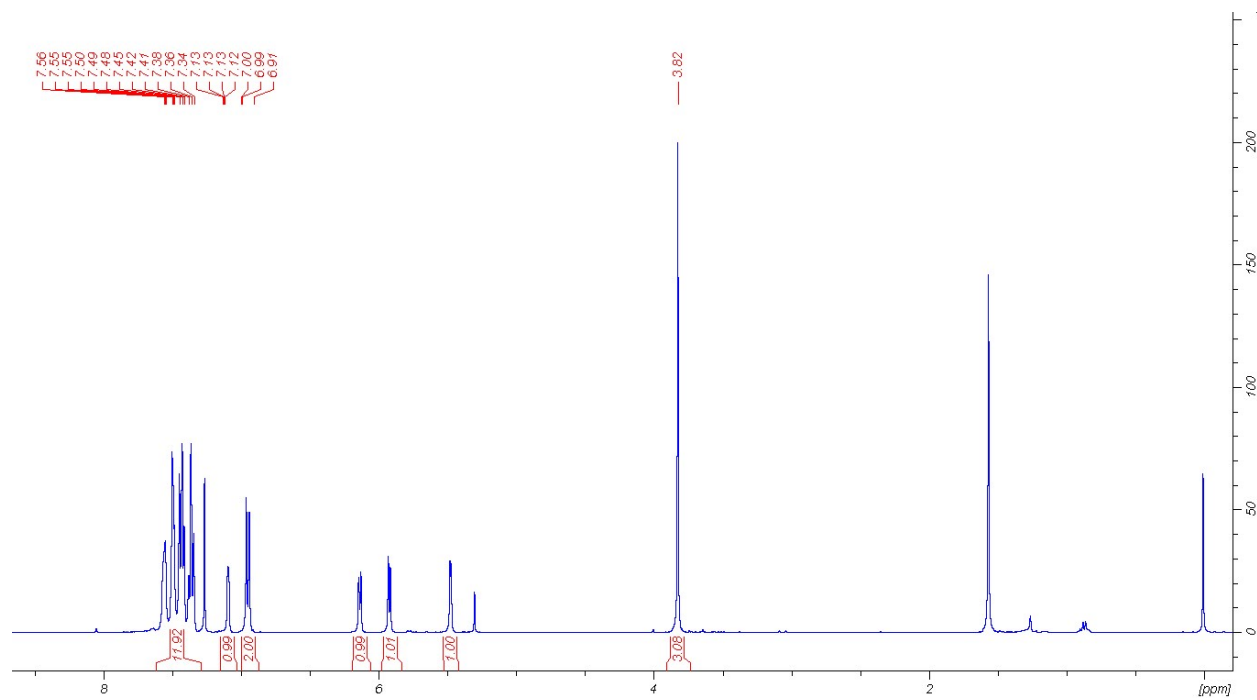

**12b <sup>1</sup>H-NMR expansion**

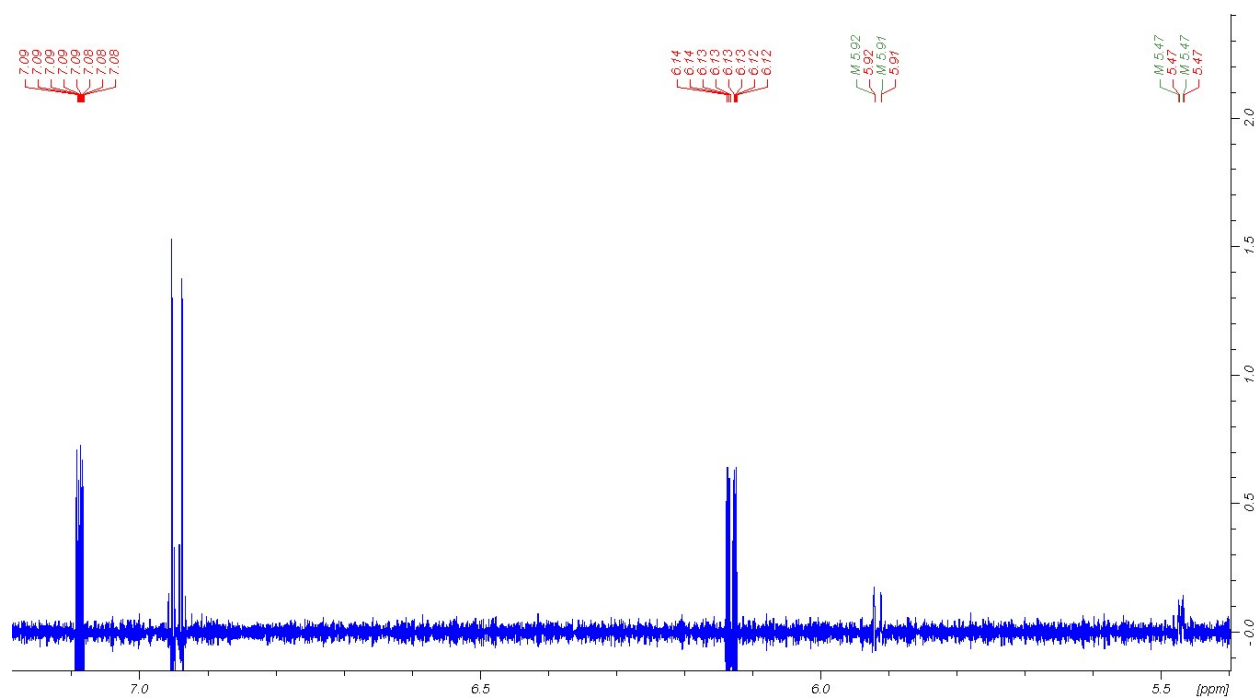

### 12b <sup>13</sup>C-NMR

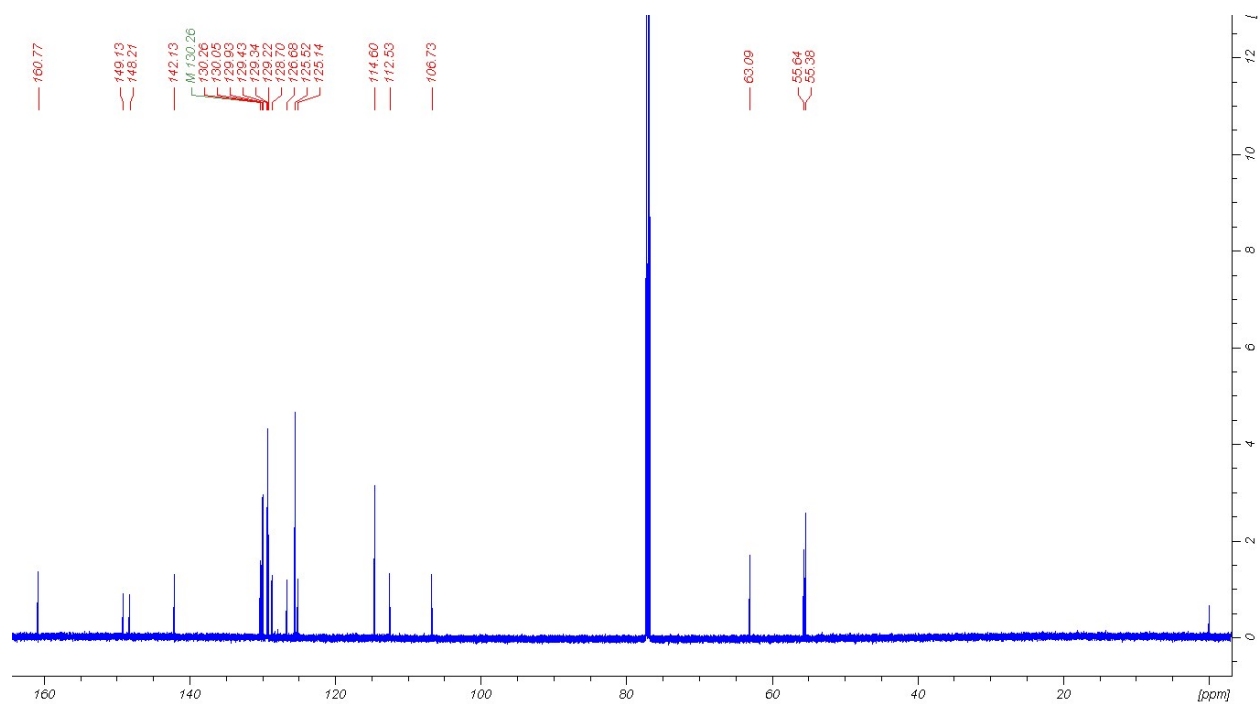

### 12b DEPT90 <sup>13</sup>C-NMR

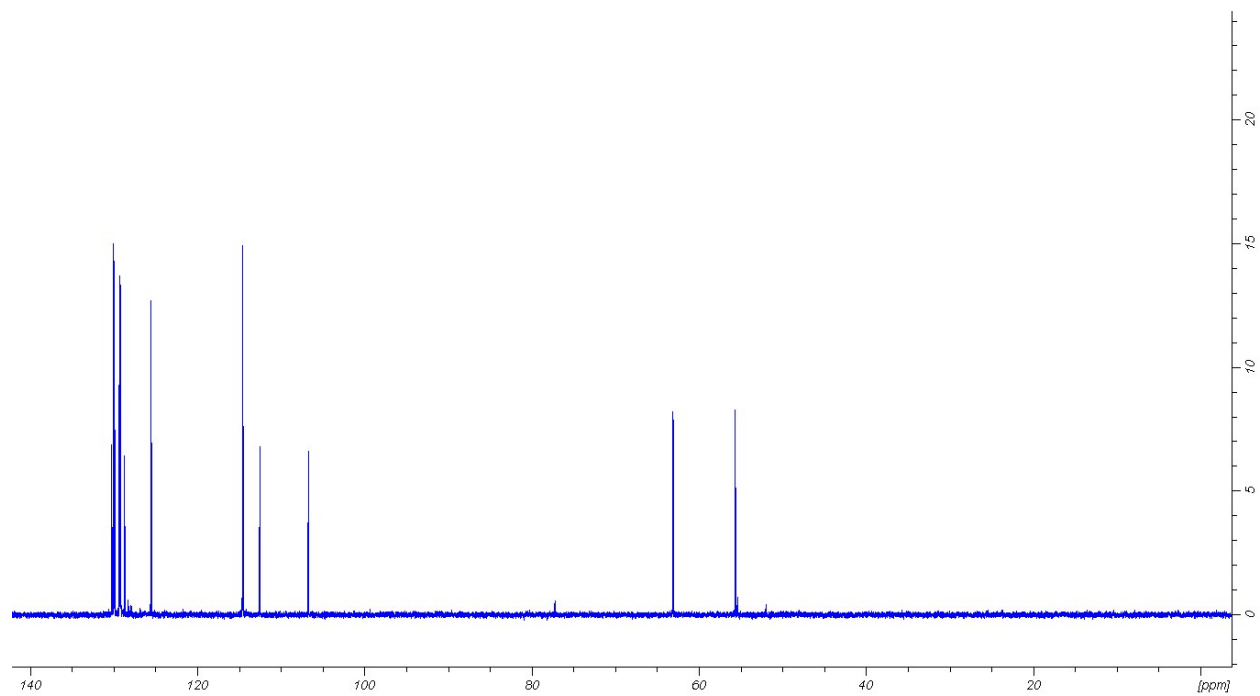

## 12b DEPT135 <sup>13</sup>C-NMR

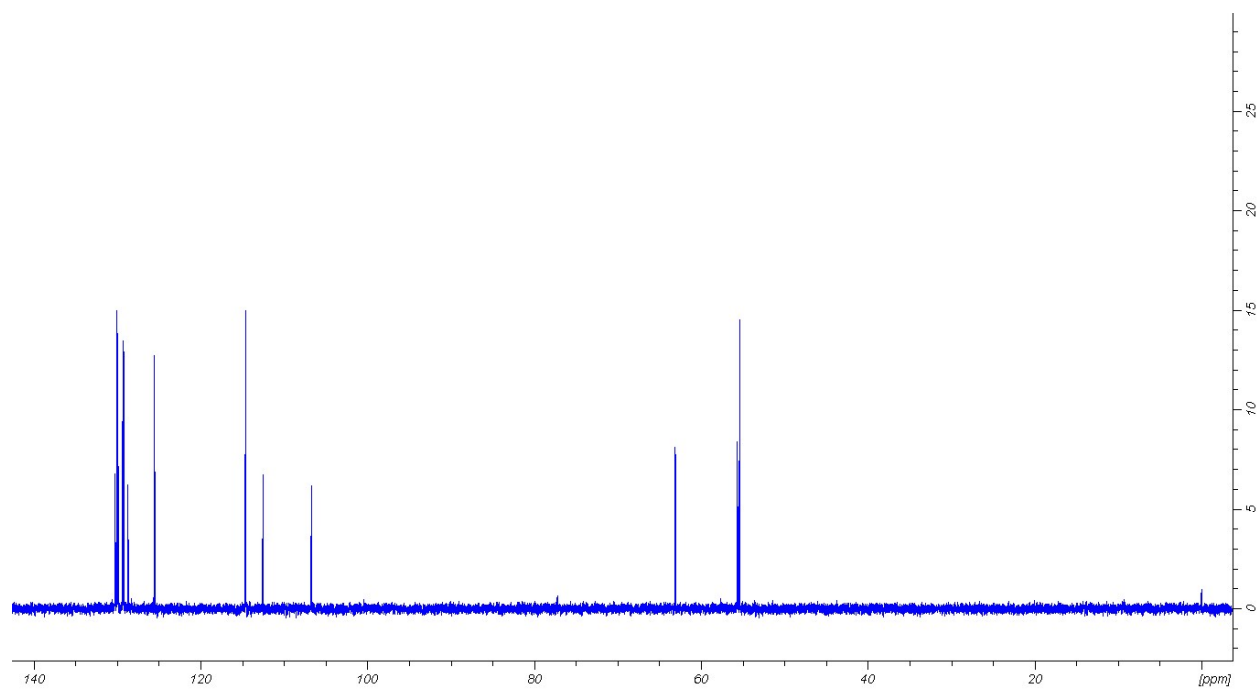

## 12b COSY-NMR

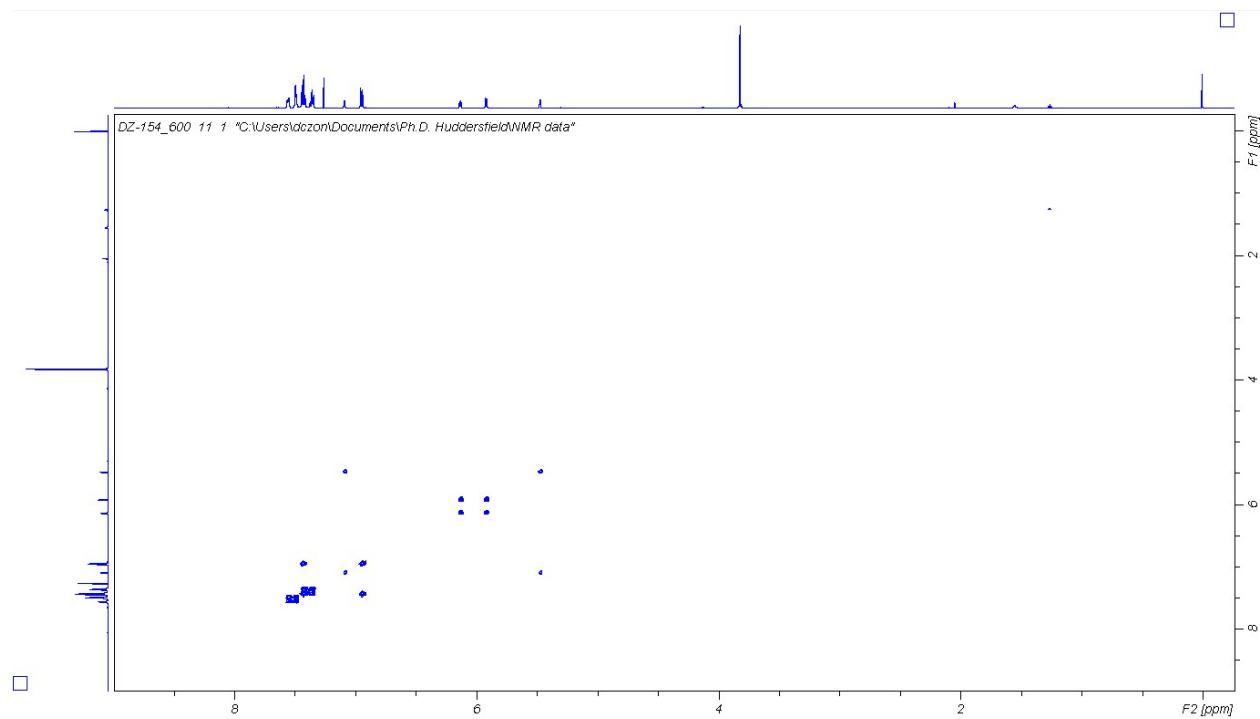



## 12b NOESY-NMR

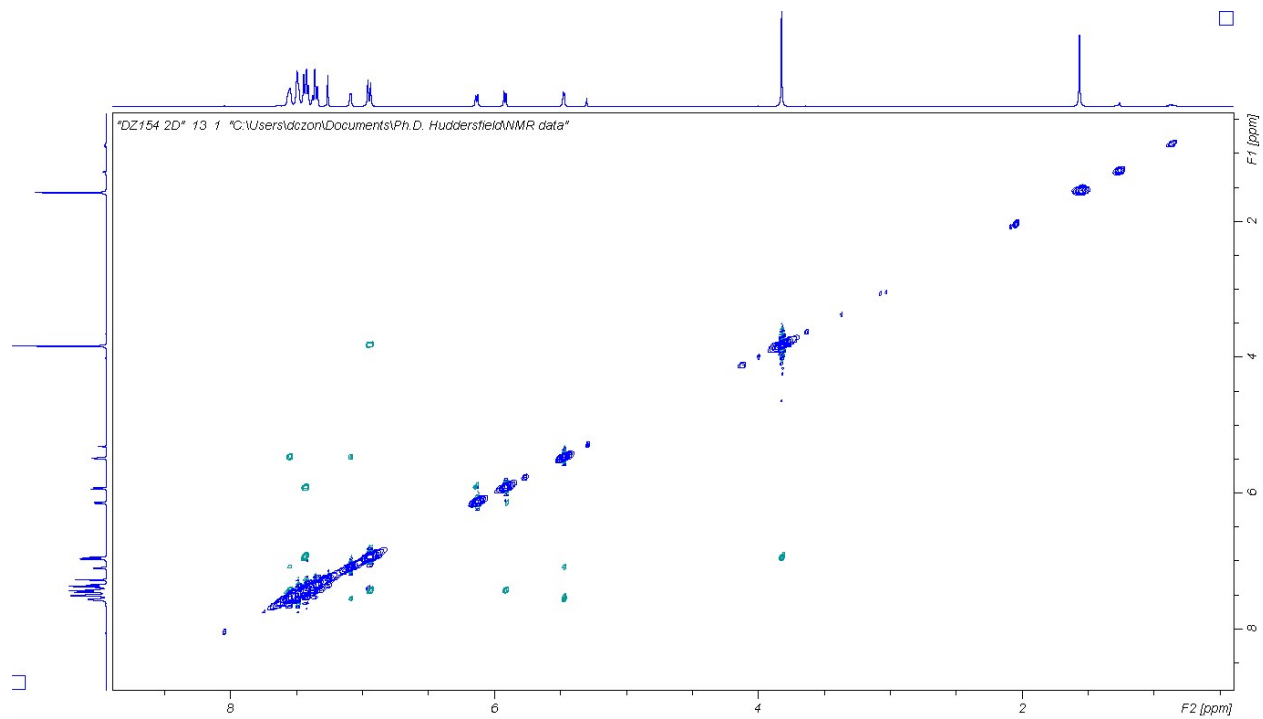

## 12b HSQC-NMR

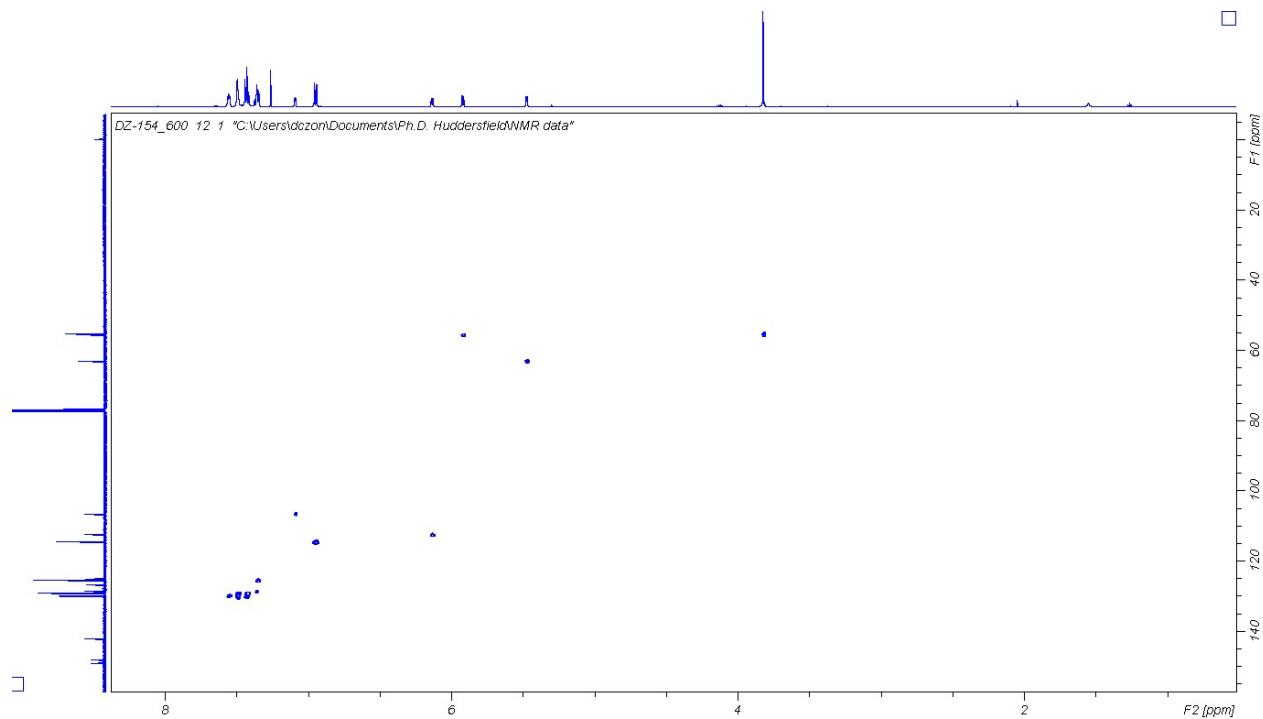

## 12b HMBC-NMR

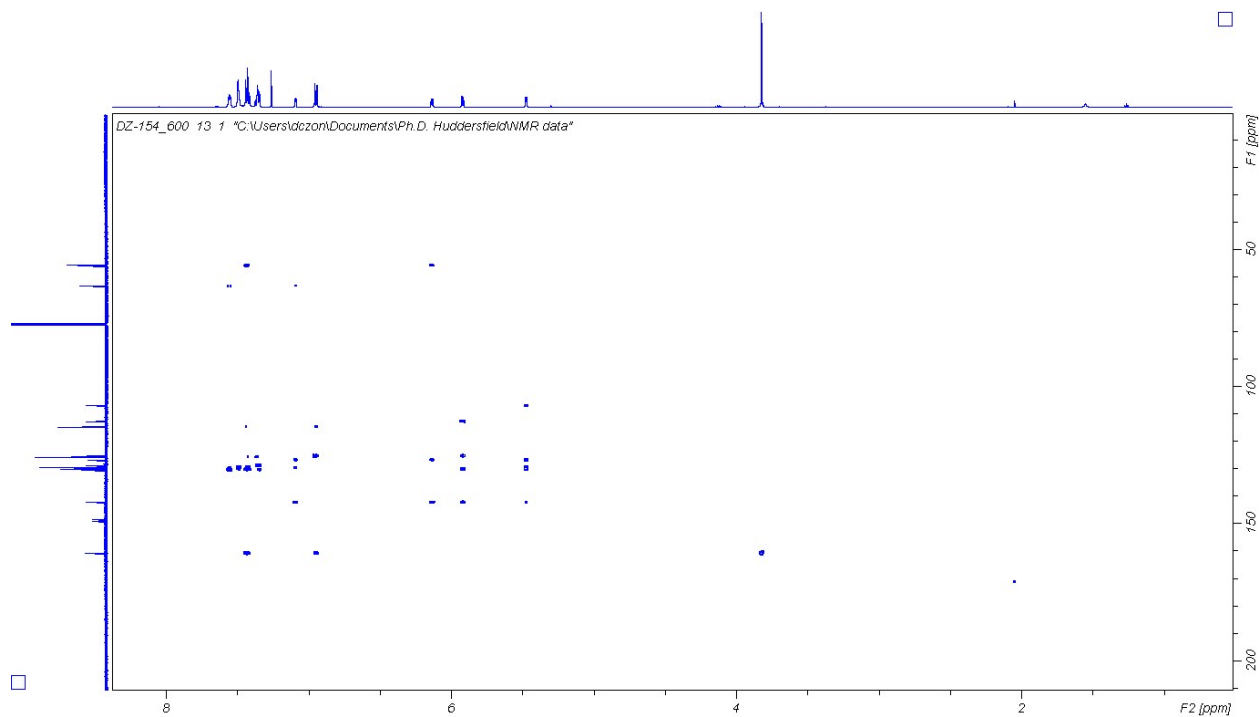

## 12b HRMS

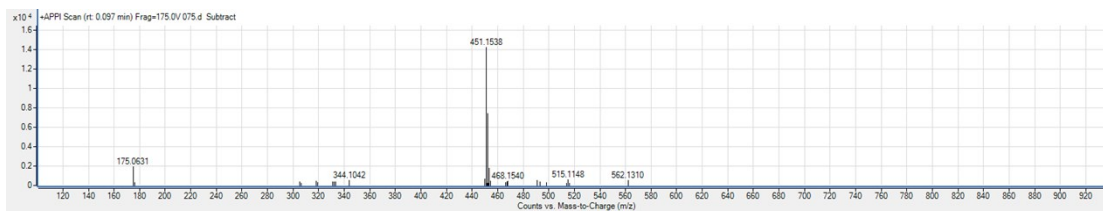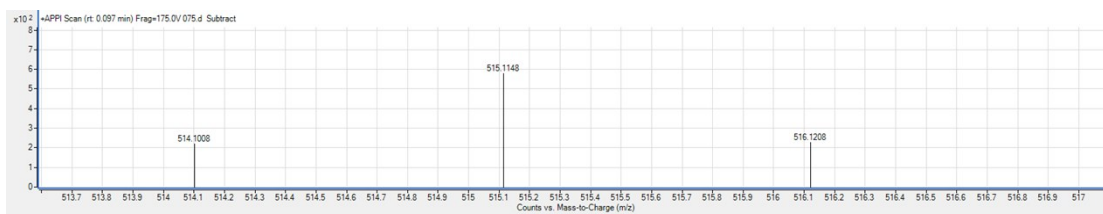

| Formula     | Observed m/z | Proposed adduct | Charge | Observed neutral mass | Theoretical neutral mass | Mass error (ppm) |
|-------------|--------------|-----------------|--------|-----------------------|--------------------------|------------------|
| C27H21N3O6S | 515.1148     | radical         | 1+     | 515.1149              | 515.1151                 | 0.39             |
|             |              |                 |        |                       |                          |                  |
|             |              |                 |        |                       |                          |                  |

**2,9-diphenyl-5-(4-(trifluoromethyl)phenyl)-5,9-dihydro-1*H*-[1,2]oxathiino[5,6-*c*][1,2,4]triazolo[1,2-*a*]pyridazine-1,3(2*H*)-dione 8,8-dioxide 12c <sup>1</sup>H-NMR**

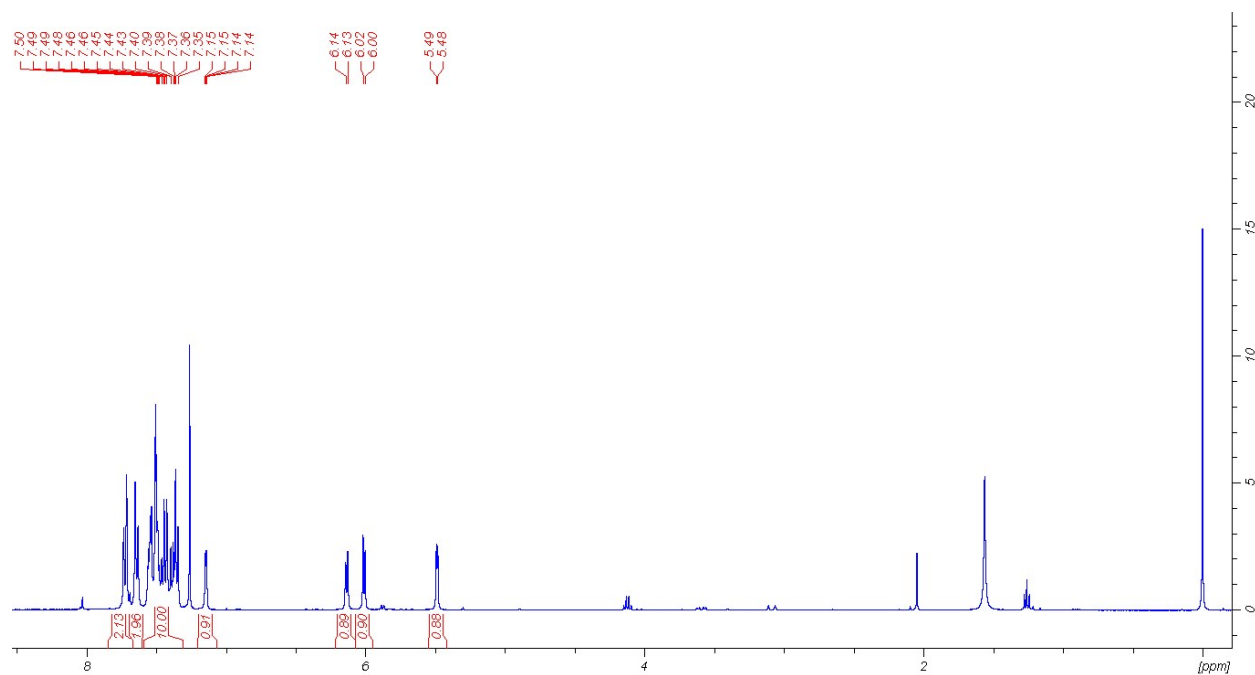

**12c <sup>13</sup>C-NMR**

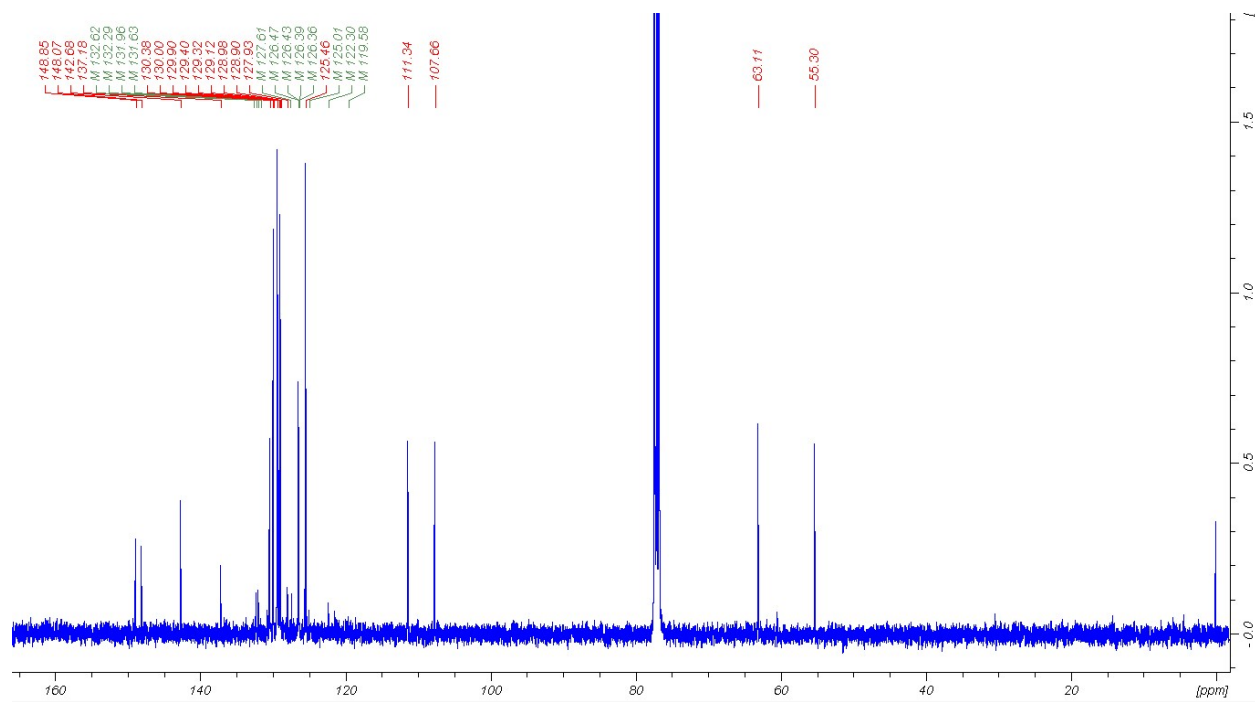

### 12c <sup>19</sup>F-NMR

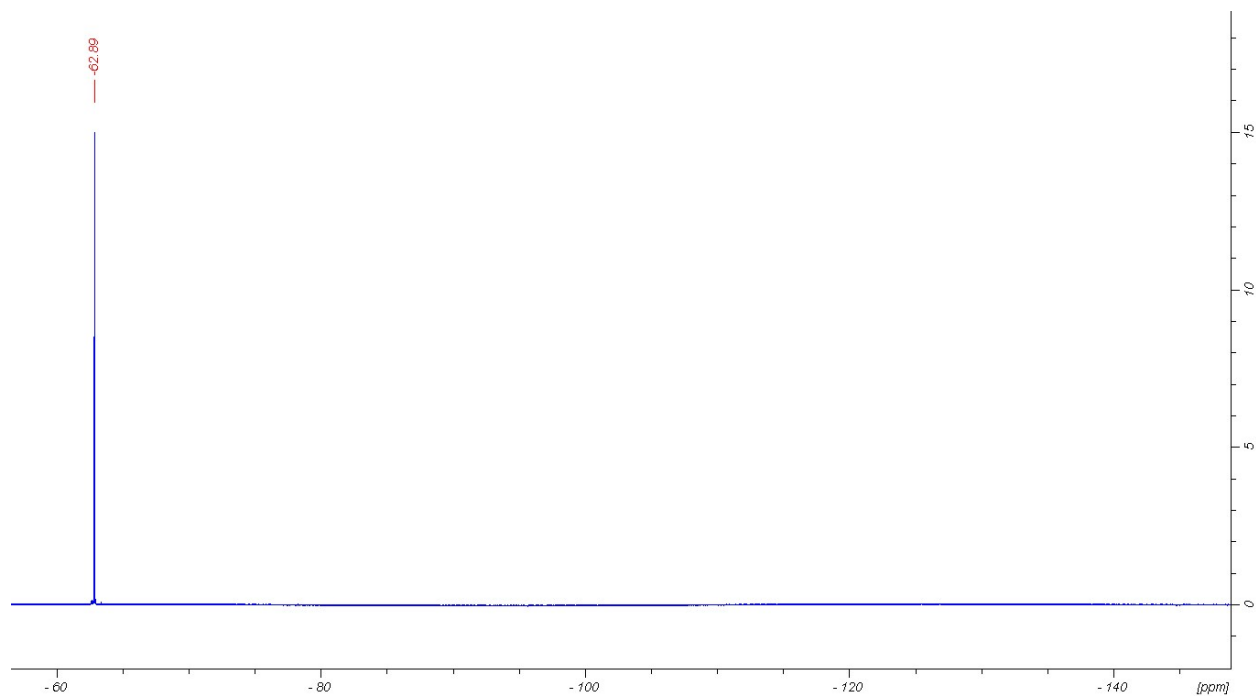

### 12c HRMS

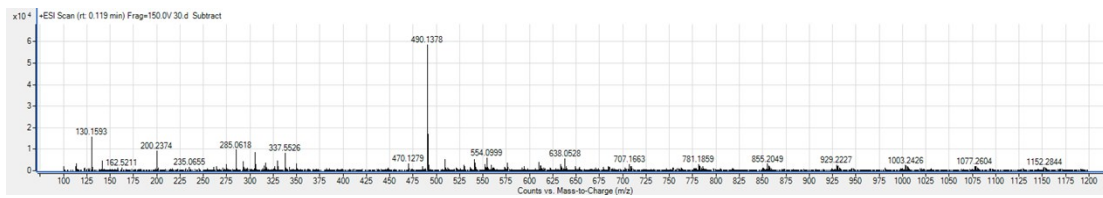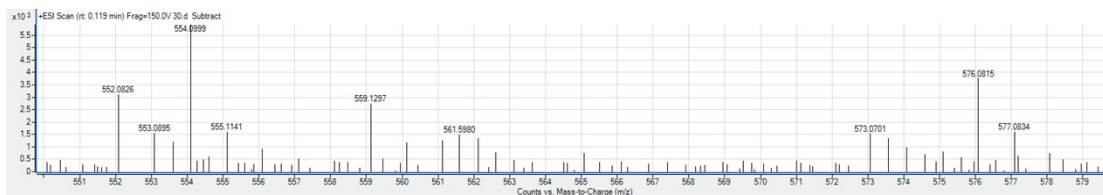

| Formula                                                                        | Observed m/z | Proposed adduct | Charge         | Observed neutral mass | Theoretical neutral mass | Mass error (ppm) |
|--------------------------------------------------------------------------------|--------------|-----------------|----------------|-----------------------|--------------------------|------------------|
| C <sub>27</sub> H <sub>18</sub> F <sub>3</sub> N <sub>3</sub> O <sub>5</sub> S | 554.0999     | H <sup>+</sup>  | 1 <sup>+</sup> | 553.0926              | 553.0919                 | 1.27             |
|                                                                                | 576.0815     | Na <sup>+</sup> | 1 <sup>+</sup> | 553.0915              |                          | 0.72             |

**2,5-Diphenyl-5,9-dihydro-1*H*-[1,2]oxathiino[5,6-*c*][1,2,4]triazolo[1,2-*a*]pyridazine-1,3(2*H*)-dione 8,8-dioxide 12e** <sup>1</sup>H-NMR

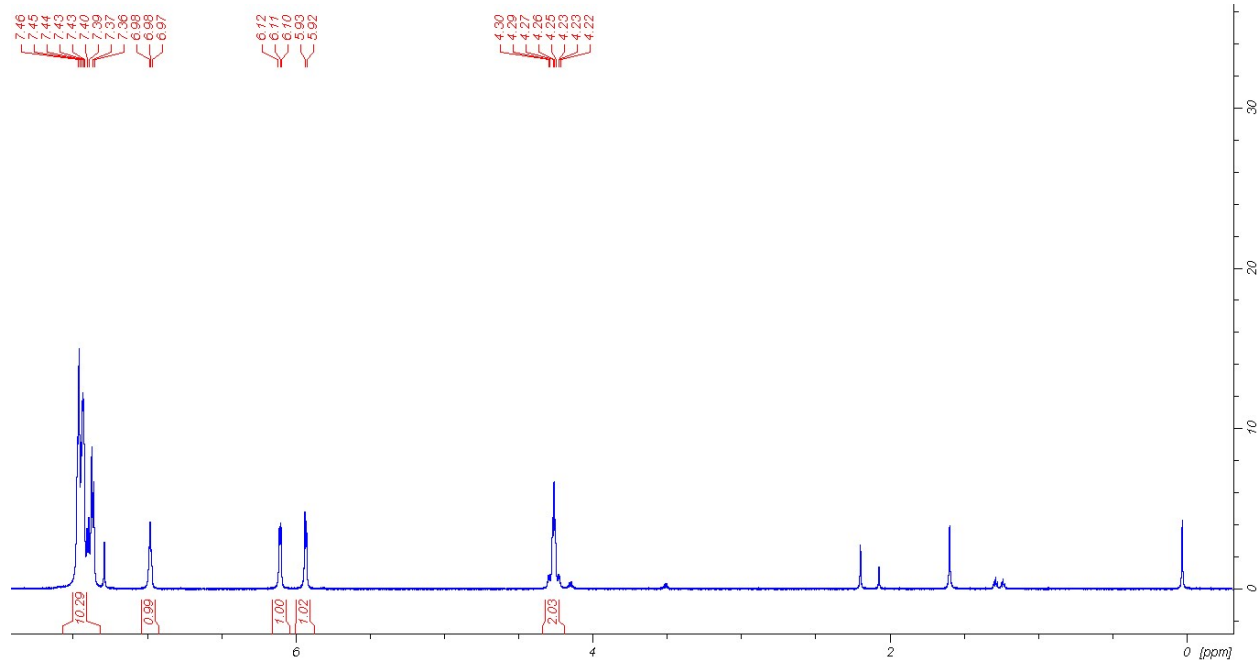

**12e** <sup>1</sup>H-NMR expansion

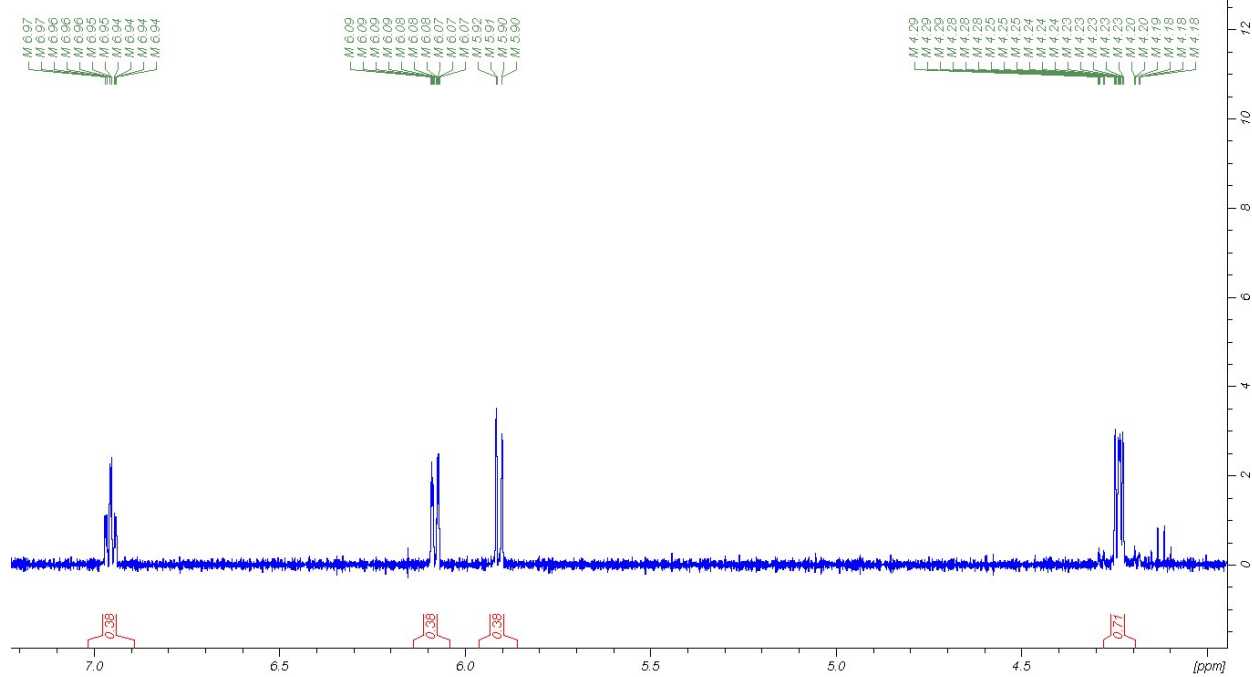

### 12e <sup>13</sup>C-NMR

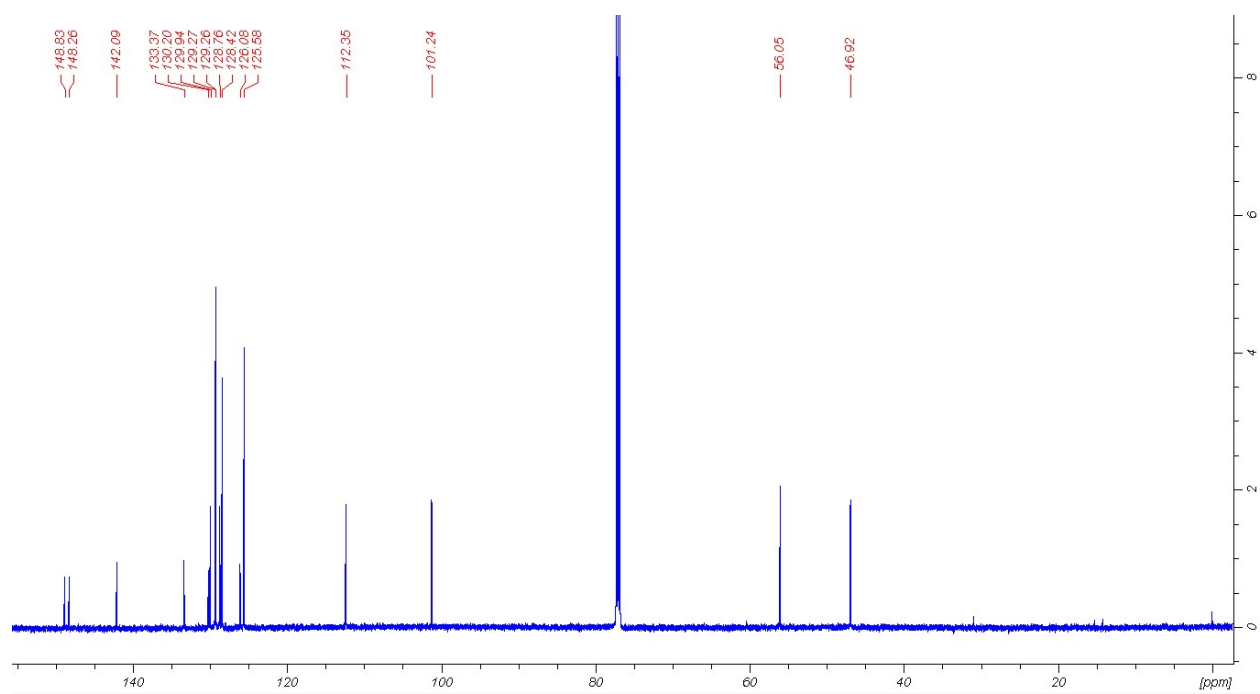

### 12e DEPT90 <sup>13</sup>C-NMR

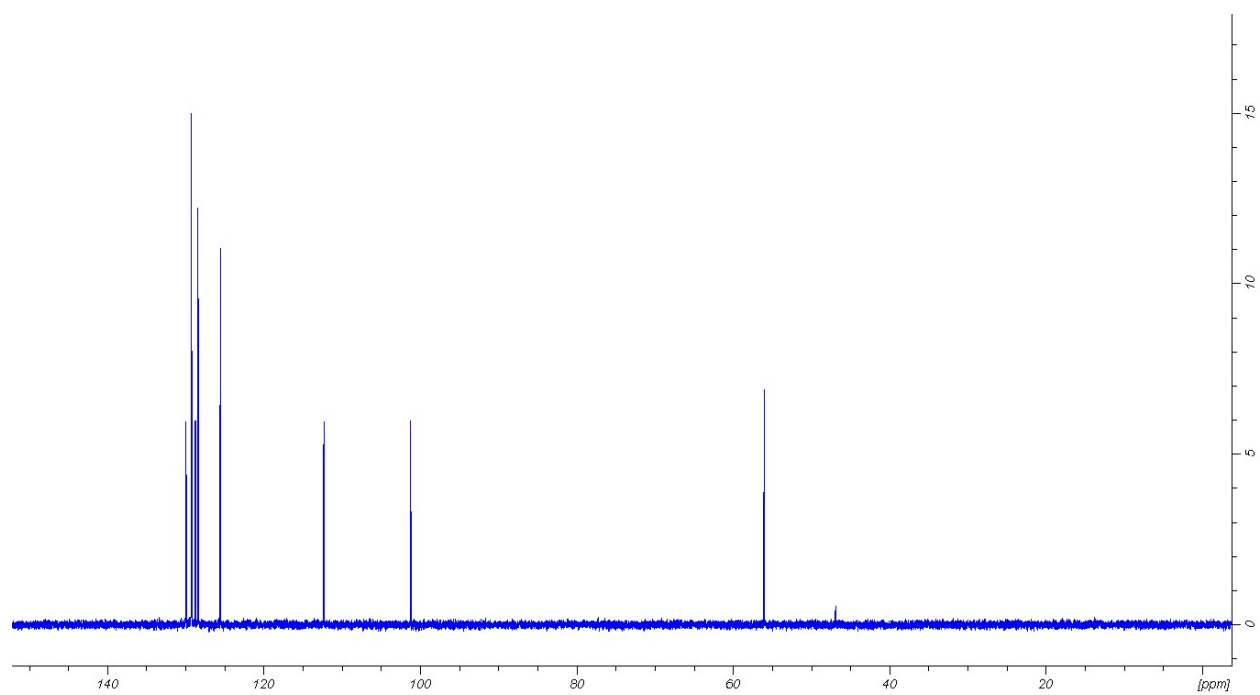

### 12e DEPT135 <sup>13</sup>C-NMR

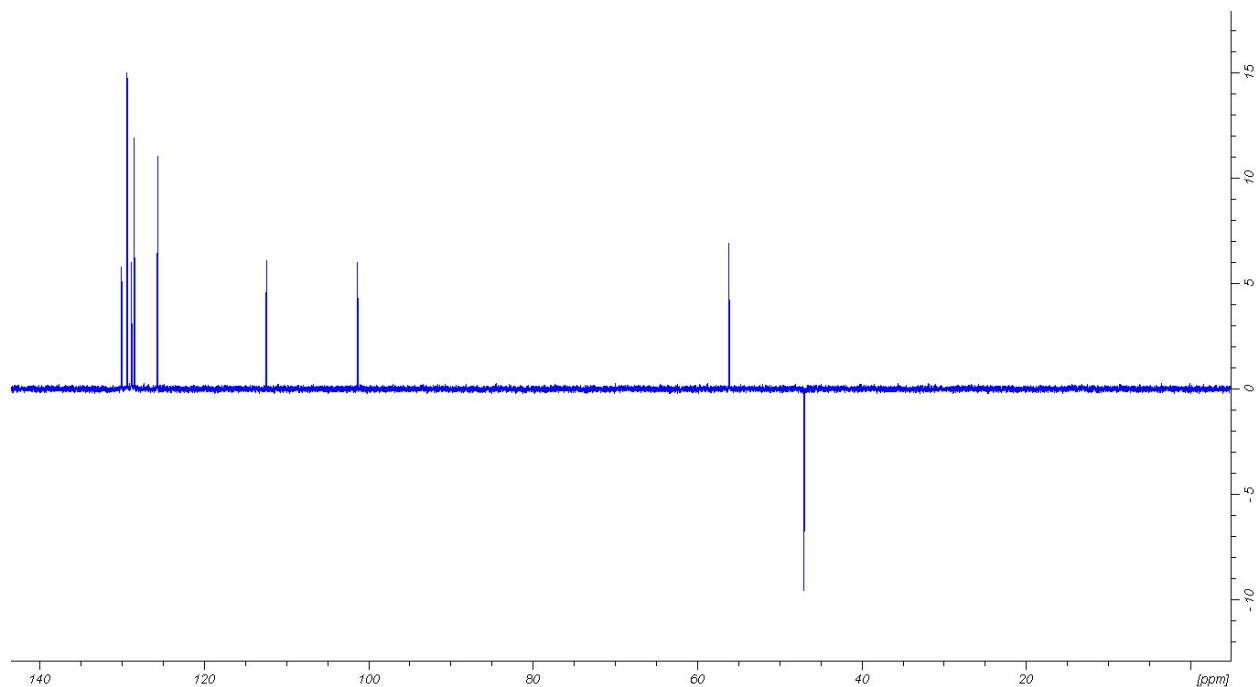

### 12e HRMS

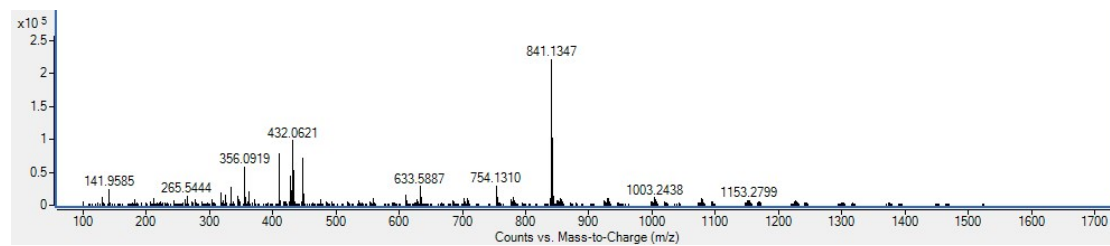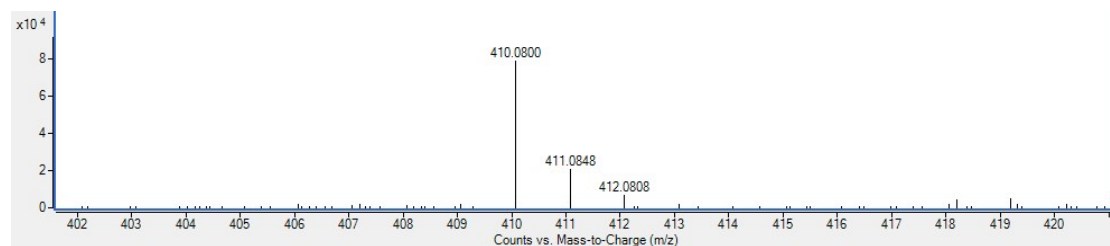

| Formula                                                         | Observed m/z | Proposed adduct | Charge | Observed neutral mass | Theoretical neutral mass | Mass error (ppm) |
|-----------------------------------------------------------------|--------------|-----------------|--------|-----------------------|--------------------------|------------------|
| C <sub>20</sub> H <sub>15</sub> N <sub>3</sub> O <sub>5</sub> S | 410.0800     | H+              | 1+     | 409.0730              | 409.0732                 | 0.49             |
|                                                                 |              |                 |        |                       |                          |                  |

**2,5-Diphenyl-9-(4-(trifluoromethyl)phenyl)-5,9-dihydro-1*H*-[1,2]oxathiino[5,6-*c*][1,2,4]triazolo[1,2-*a*]pyridazine-1,3(2*H*)-dione 8,8-dioxide 12f <sup>1</sup>H-NMR**

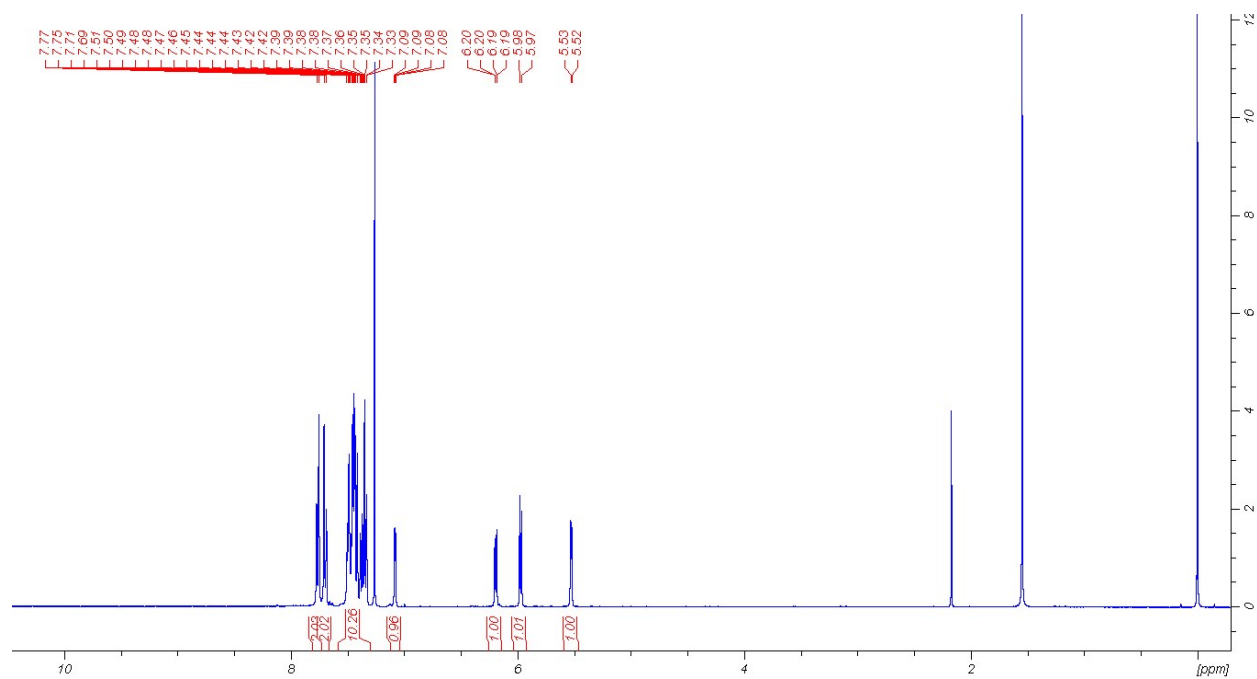

**12f <sup>1</sup>H-NMR expansion**

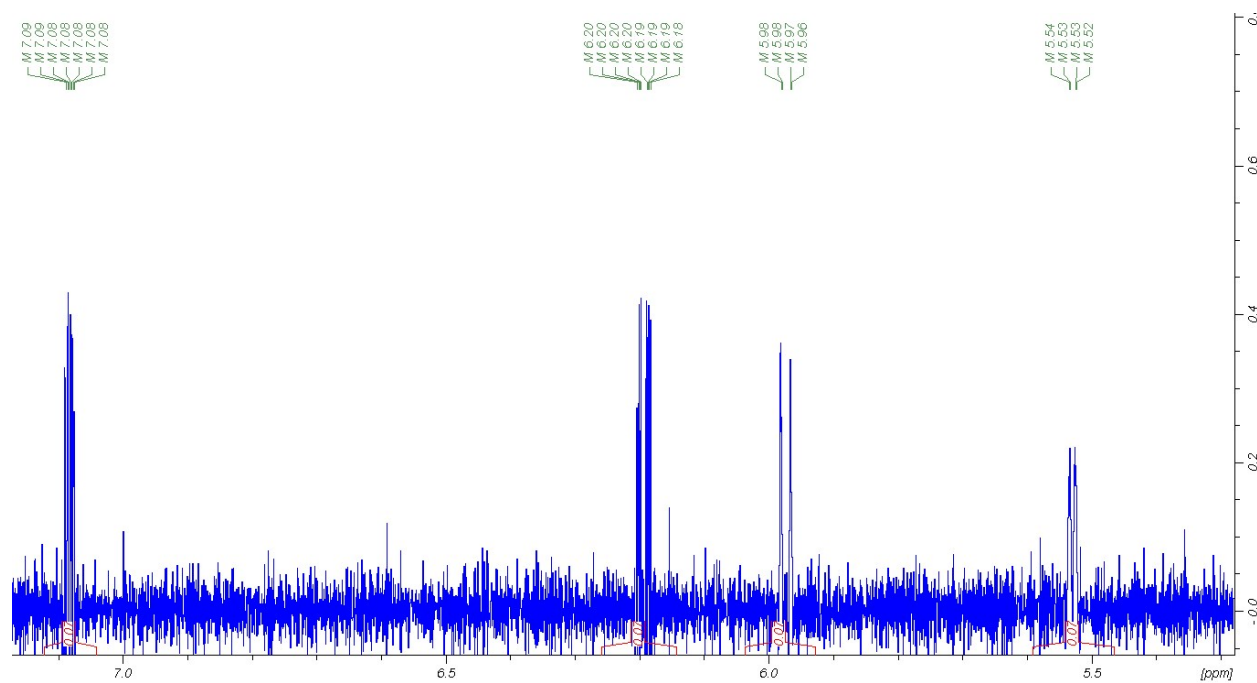



### 12f <sup>13</sup>C-NMR

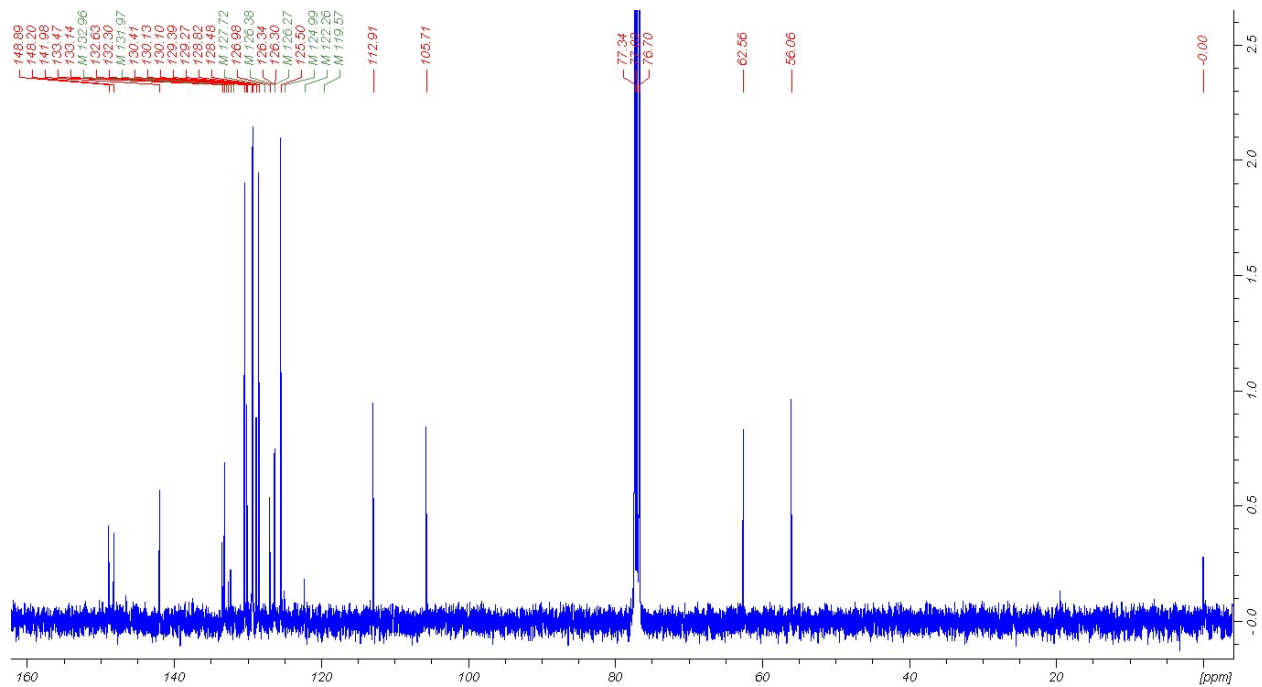

### 12f <sup>19</sup>F-NMR

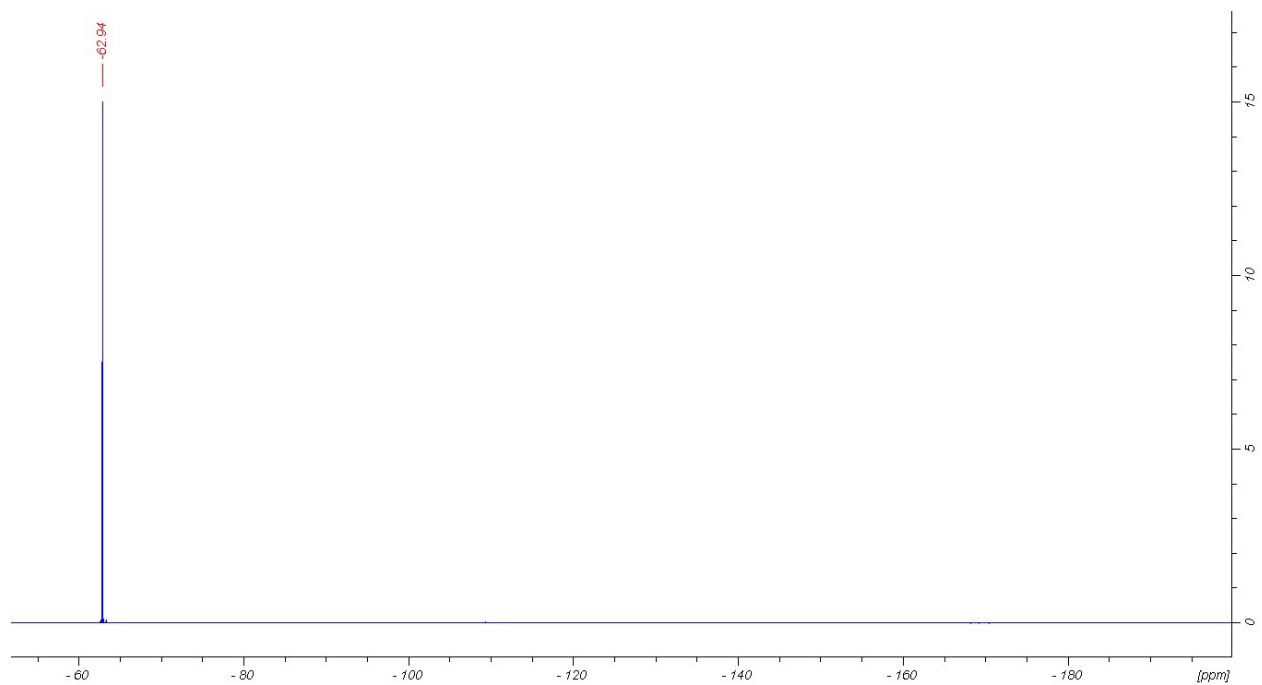

## 12f HRMS

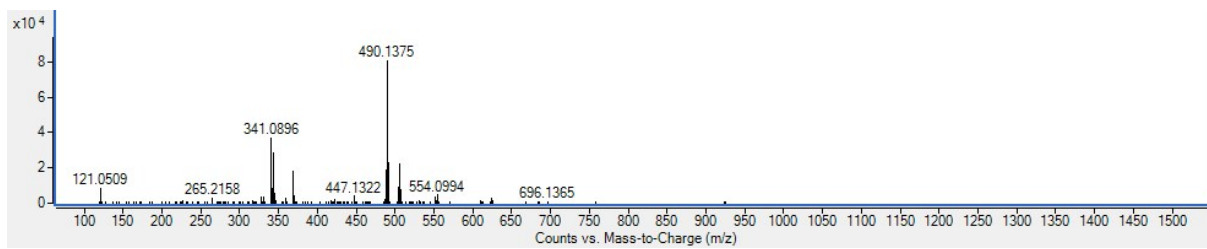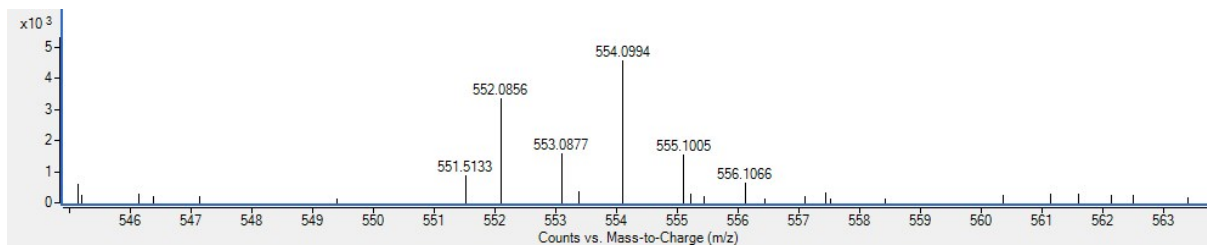

| Formula                                                                        | Observed m/z | Proposed adduct | Charge | Observed neutral mass | Theoretical neutral mass | Mass error (ppm) |
|--------------------------------------------------------------------------------|--------------|-----------------|--------|-----------------------|--------------------------|------------------|
| C <sub>27</sub> H <sub>18</sub> F <sub>3</sub> N <sub>3</sub> O <sub>5</sub> S | 554.0994     | H+              | 1+     | 553.0917              | 553.0919                 | 0.36             |
|                                                                                |              |                 |        |                       |                          |                  |
|                                                                                |              |                 |        |                       |                          |                  |

**Dimethyl 7-(4-methoxyphenyl)-3-phenylbenzo[e][1,2]oxathine-5,6-dicarboxylate 2,2-dioxide 13** <sup>1</sup>H-NMR

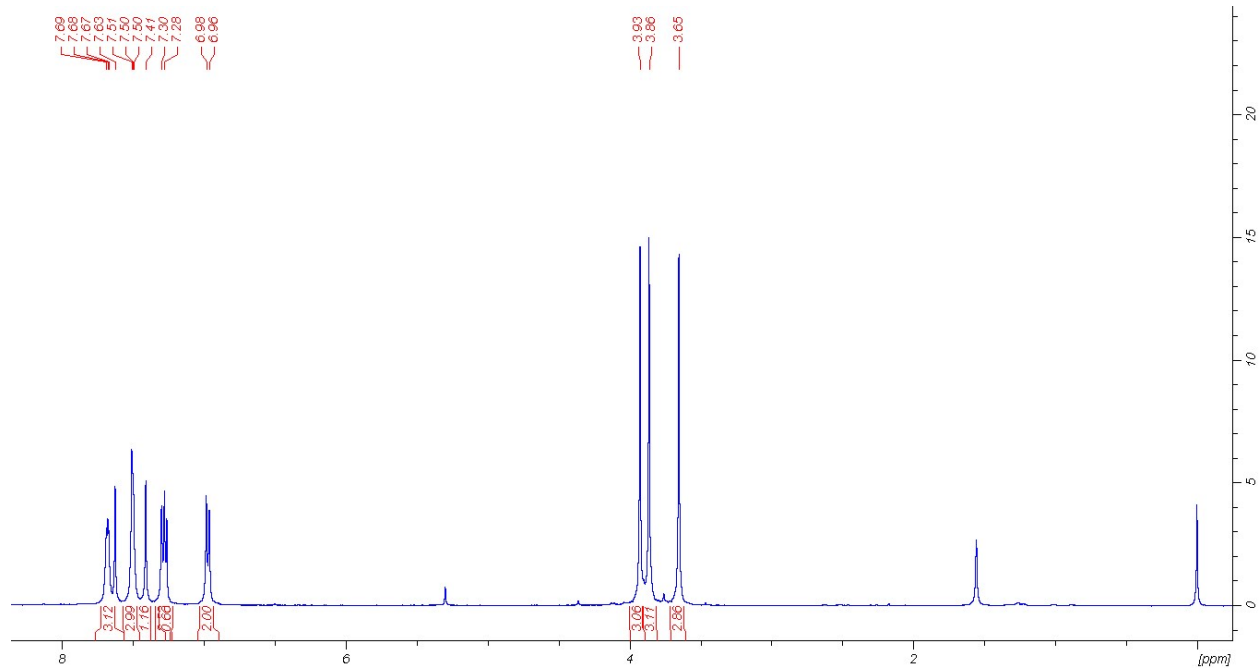

**13** <sup>13</sup>C-NMR

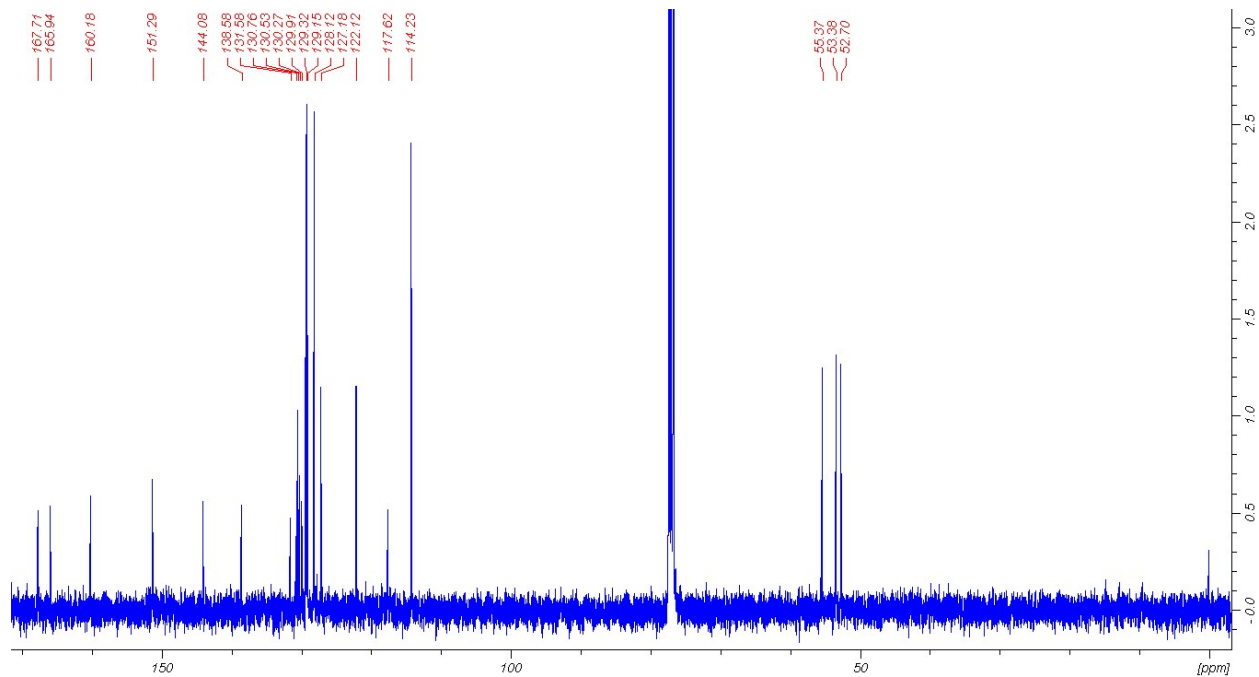

### 13 HRMS

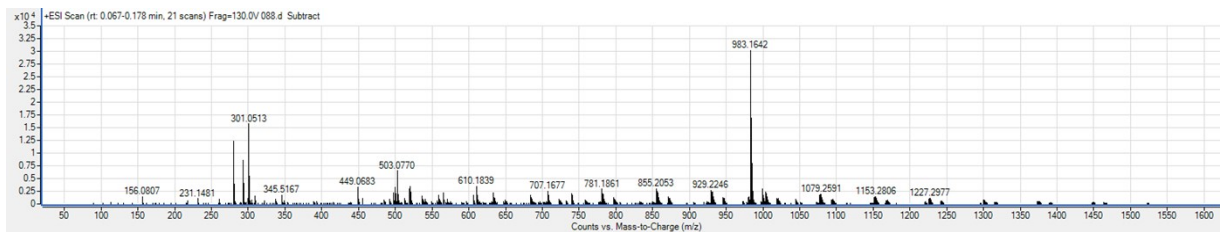

| Formula                                          | Observed m/z | Proposed adduct | Charge | Observed neutral mass | Theoretical neutral mass | Mass error (ppm) |
|--------------------------------------------------|--------------|-----------------|--------|-----------------------|--------------------------|------------------|
| C <sub>25</sub> H <sub>20</sub> O <sub>8</sub> S | 503.0770     | Na+             | 1+     | 480.0879              | 480.0879                 | 0.1              |
|                                                  |              |                 |        |                       |                          |                  |
|                                                  |              |                 |        |                       |                          |                  |

# 1,4-Diphenylnaphthalene 16 <sup>1</sup>H-NMR

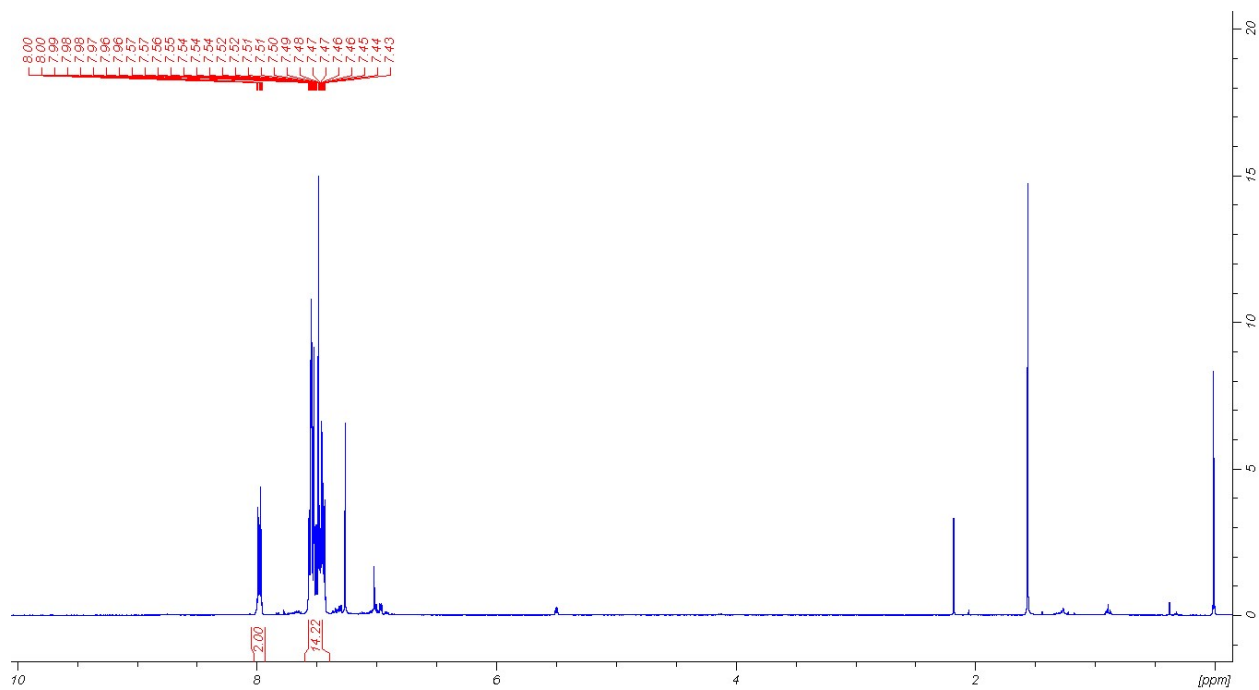

# 16 <sup>13</sup>C-NMR

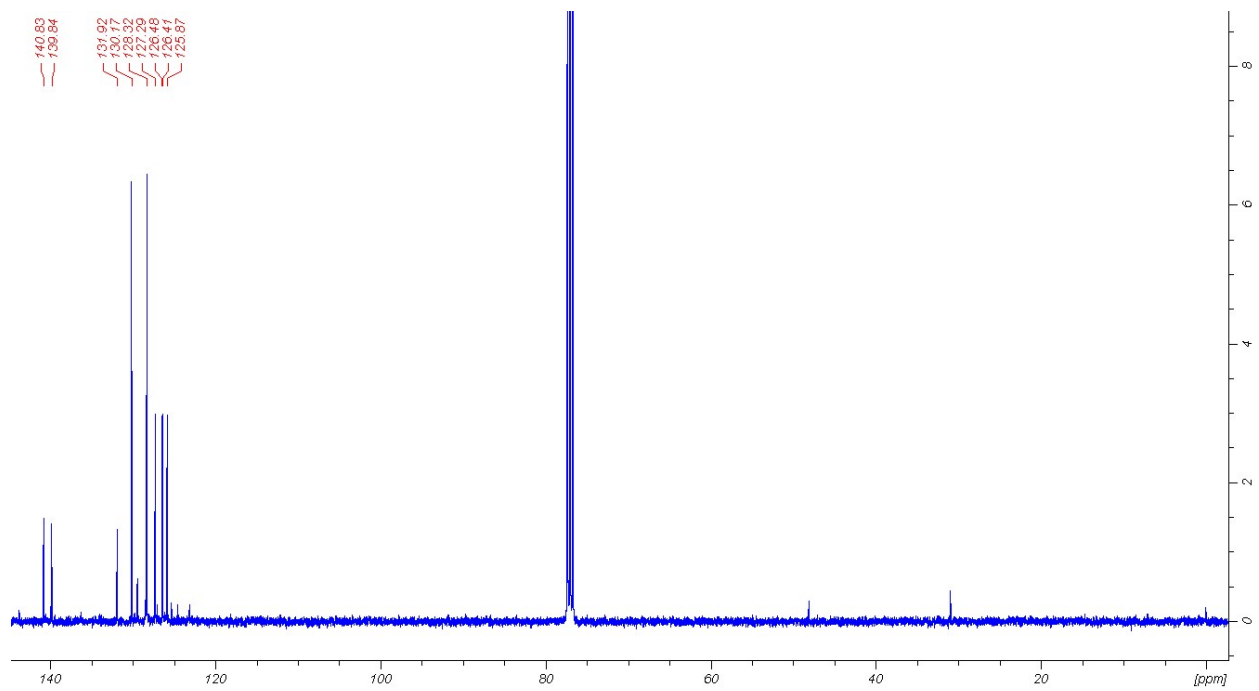

# 1-(4-Methoxyphenyl)naphthalene 17 <sup>1</sup>H-NMR

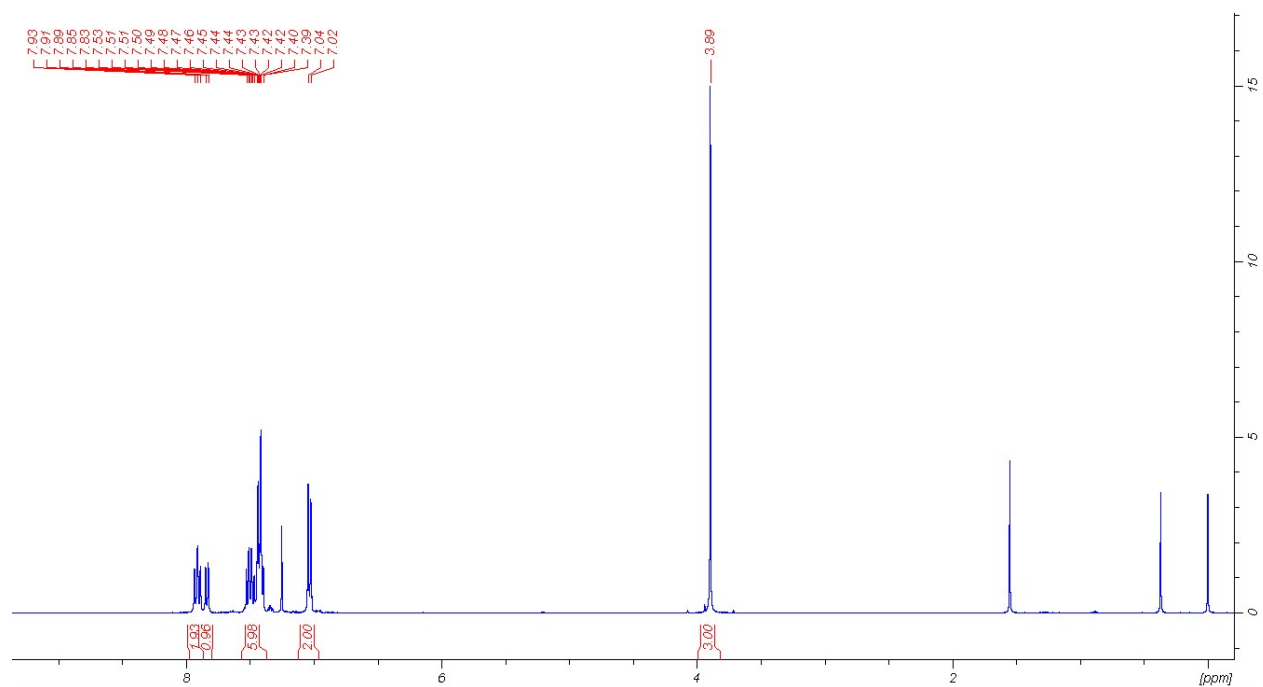

# 17 <sup>13</sup>C-NMR

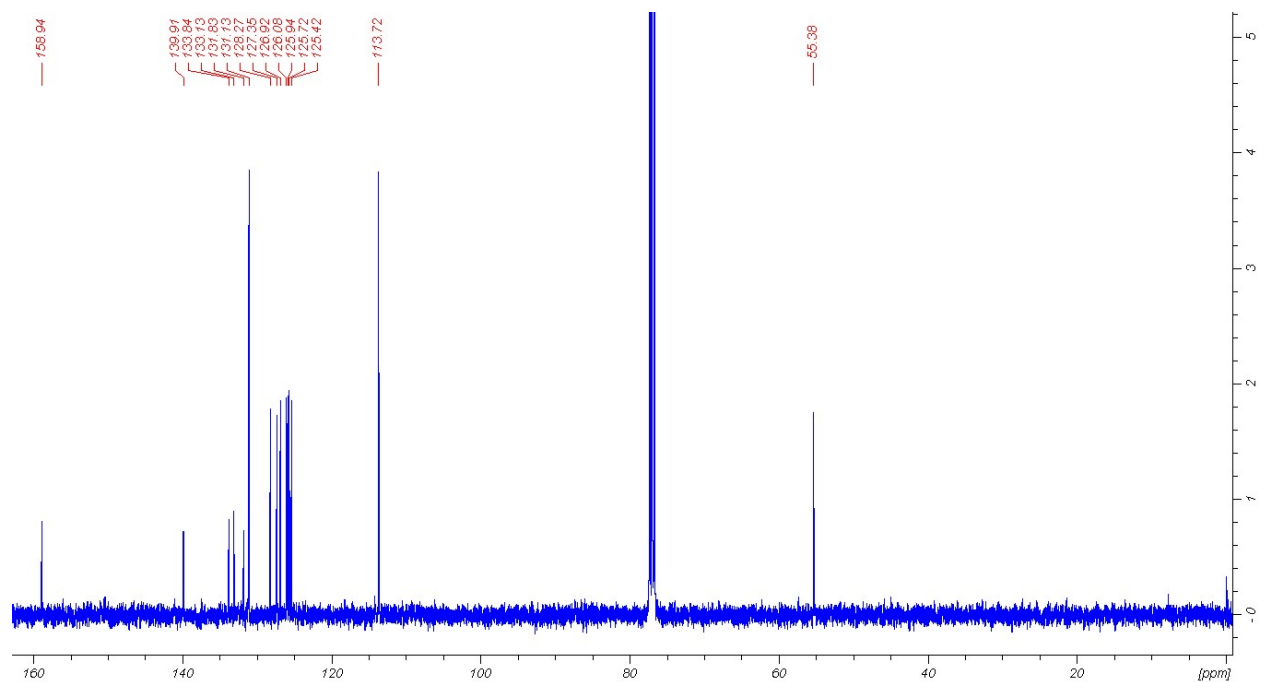

# 1,2,4-Triphenylnaphthalene 18 <sup>1</sup>H-NMR

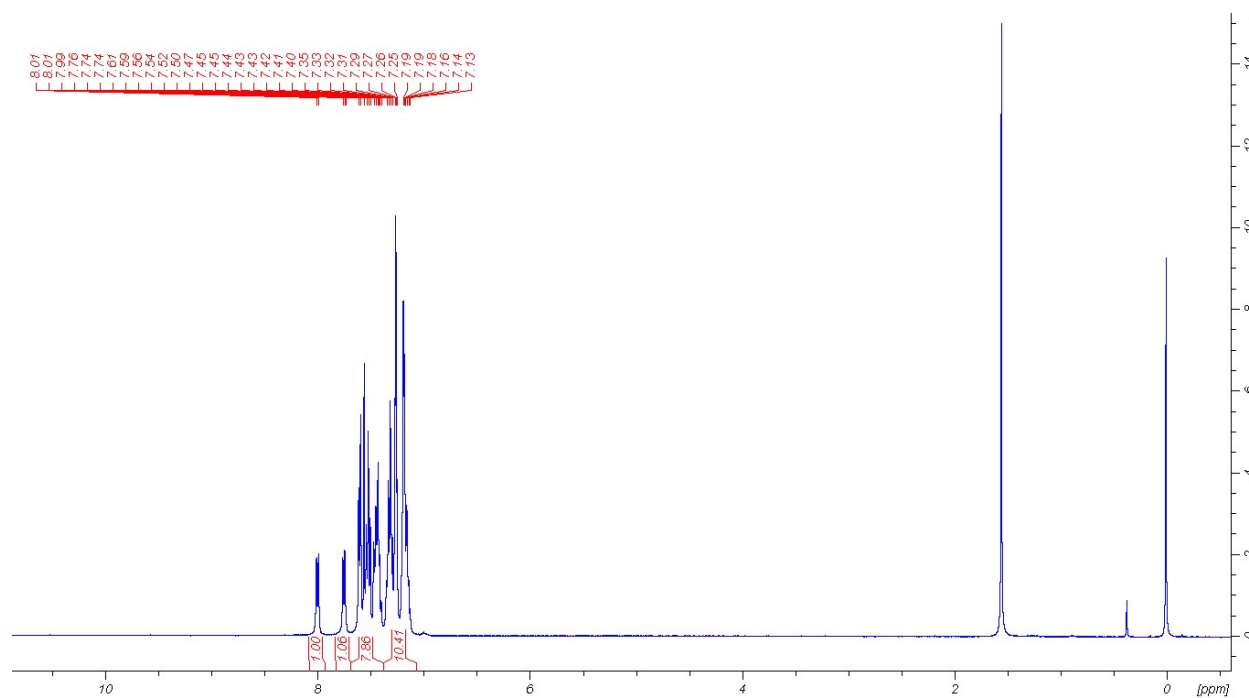

# 18 <sup>13</sup>C-NMR

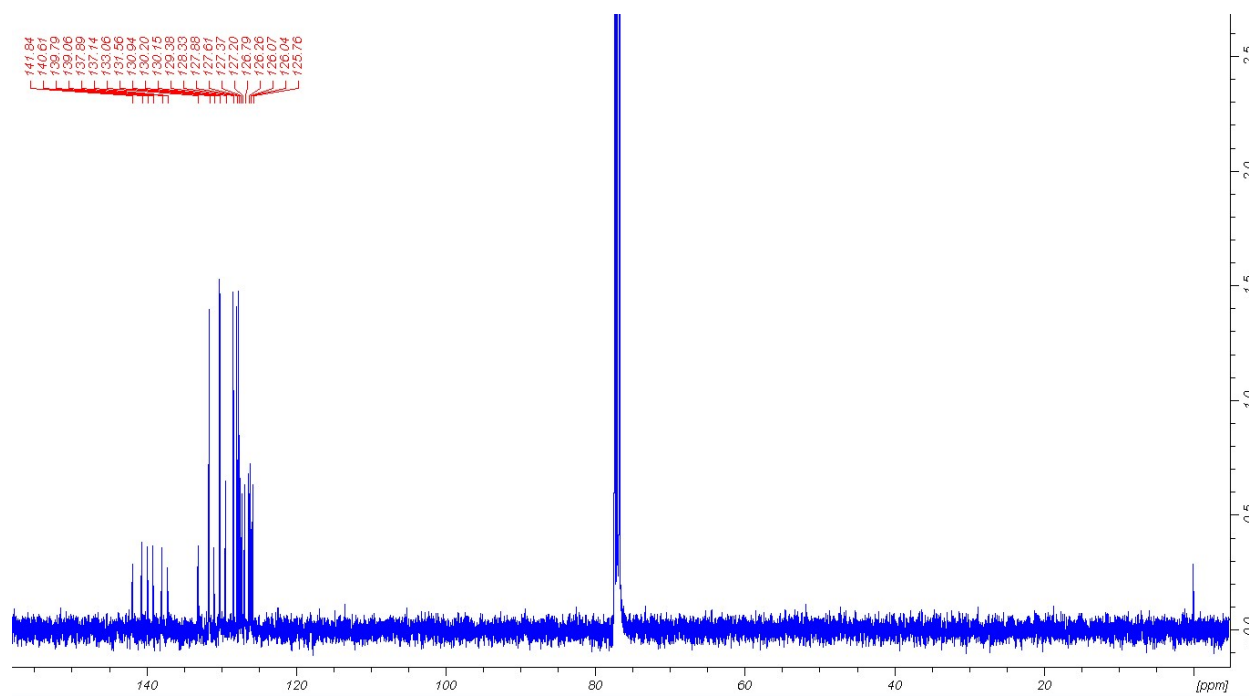

END
